# Supplementary material for: Transgenic quails reveal dynamic TCF/β-catenin signaling during avian embryonic development
Source: eLife. 2022 Jul 14;11:e72098. doi: 10.7554/eLife.72098 (PMC9395189; doi:10.7554/eLife.72098)
Supplement: Figure 1—figure supplement 1—source data 1. [file elife-72098-fig1-figsupp1-data1.xlsx]

## Sheet: Sheet1
Embryo	Condition	BFP_only	BFP_Venus	Ratio		Ave
6	16X	60	41	40.5941	68.3333
7	16X	51	62	54.8673	121.569
8	16X	53	78	59.542	147.17
9	16X	36	23	38.9831	63.8889	98.1385
10	16X	57	55	49.1071	96.4912
11	16X	58	53	47.7477	91.3793
12	DN LEF1	64	3	4.47761	4.6875
13	DN LEF1	82	9	9.89011	10.9756	10.8239
14	DN LEF1	81	10	10.989	12.3457
15	DN LEF1	153	14	8.38323	9.15033
16	Axin2	978	268	21.5088	27.4029	25.9386
17	Axin2	1788	530	22.8645	29.6421
18	Axin2	467	97	17.1986	20.7709
19	Axin2	645	353	35.3707	54.7287
