# Supplementary material for: Transgenic quails reveal dynamic TCF/β-catenin signaling during avian embryonic development
Source: eLife. 2022 Jul 14;11:e72098. doi: 10.7554/eLife.72098 (PMC9395189; doi:10.7554/eLife.72098)
Supplement: Figure 1—figure supplement 2—source data 1. [file elife-72098-fig1-figsupp2-data1.xlsx]

## Sheet: 31
BFP										TF-GFP
Embryo		Area	Mean	Min	Max	IntDen	RawIntDen			Embryo		Area	Mean	Min	Max	IntDen	RawIntDen
	1	94324	255	255	255	24052620	24052620				1	84	255	255	255	21420	21420
	2	1	255	255	255	255	255				2	1	255	255	255	255	255
	3	2	255	255	255	510	510				3	14	255	255	255	3570	3570
	4	3	255	255	255	765	765				4	566	255	255	255	144330	144330
	5	3	255	255	255	765	765				5	62	255	255	255	15810	15810
	6	1	255	255	255	255	255				6	1	255	255	255	255	255
	7	19	255	255	255	4845	4845				7	1	255	255	255	255	255
	8	12	255	255	255	3060	3060				8	1	255	255	255	255	255
	9	1	255	255	255	255	255				9	1	255	255	255	255	255
	10	133	255	255	255	33915	33915				10	1	255	255	255	255	255
	11	19	255	255	255	4845	4845				11	1	255	255	255	255	255
	12	1	255	255	255	255	255				12	11	255	255	255	2805	2805
	13	8	255	255	255	2040	2040				13	256	255	255	255	65280	65280
	14	1	255	255	255	255	255				14	2	255	255	255	510	510
	15	1	255	255	255	255	255				15	1	255	255	255	255	255
	16	20	255	255	255	5100	5100				16	1	255	255	255	255	255
	17	399	255	255	255	101745	101745				17	1	255	255	255	255	255
	18	1	255	255	255	255	255				18	1	255	255	255	255	255
	19	1	255	255	255	255	255				19	1	255	255	255	255	255
	20	1	255	255	255	255	255				20	3	255	255	255	765	765
	21	1	255	255	255	255	255				21	1	255	255	255	255	255
	22	1	255	255	255	255	255				22	1	255	255	255	255	255
	23	1	255	255	255	255	255				23	3	255	255	255	765	765
	24	1	255	255	255	255	255				24	1	255	255	255	255	255
	25	2	255	255	255	510	510				25	35	255	255	255	8925	8925
	26	1	255	255	255	255	255				26	3	255	255	255	765	765
	27	316	255	255	255	80580	80580				27	1	255	255	255	255	255
	28	1	255	255	255	255	255				28	1	255	255	255	255	255
	29	37	255	255	255	9435	9435				29	5	255	255	255	1275	1275
	30	11	255	255	255	2805	2805				30	2	255	255	255	510	510
	31	1	255	255	255	255	255				31	1	255	255	255	255	255
	32	2	255	255	255	510	510				32	1	255	255	255	255	255
	33	183	255	255	255	46665	46665				33	1	255	255	255	255	255
	34	3	255	255	255	765	765				34	1	255	255	255	255	255
	35	2	255	255	255	510	510				35	2	255	255	255	510	510
	36	3	255	255	255	765	765				36	5	255	255	255	1275	1275
	37	13	255	255	255	3315	3315				37	1	255	255	255	255	255
	38	460	255	255	255	117300	117300				38	1	255	255	255	255	255
	39	1	255	255	255	255	255				39	1	255	255	255	255	255
	40	1	255	255	255	255	255				40	1	255	255	255	255	255
	41	21	255	255	255	5355	5355				41	1	255	255	255	255	255
	42	5	255	255	255	1275	1275				42	2	255	255	255	510	510
	43	1	255	255	255	255	255				43	3	255	255	255	765	765
	44	2137	255	255	255	544935	544935				44	8	255	255	255	2040	2040
	45	485	255	255	255	123675	123675				45	1	255	255	255	255	255
	46	1	255	255	255	255	255				46	1	255	255	255	255	255
	47	354	255	255	255	90270	90270				47	1	255	255	255	255	255
	48	4	255	255	255	1020	1020				48	1	255	255	255	255	255
	49	17	255	255	255	4335	4335				49	1	255	255	255	255	255
	50	3	255	255	255	765	765				50	1	255	255	255	255	255
	51	11	255	255	255	2805	2805				51	1	255	255	255	255	255
	52	1	255	255	255	255	255				52	1	255	255	255	255	255
	1	28	255	255	255	7140	7140				53	1	255	255	255	255	255
	2	53	255	255	255	13515	13515				54	1	255	255	255	255	255
	3	136376	255	255	255	34775880	34775880				55	2	255	255	255	510	510
	4	1	255	255	255	255	255				56	12	255	255	255	3060	3060
	5	1	255	255	255	255	255				57	1	255	255	255	255	255
	6	1	255	255	255	255	255				58	1	255	255	255	255	255
	7	357	255	255	255	91035	91035				59	1	255	255	255	255	255
	8	2	255	255	255	510	510				60	1	255	255	255	255	255
	9	1	255	255	255	255	255				61	1	255	255	255	255	255
	10	405	255	255	255	103275	103275				62	6	255	255	255	1530	1530
	11	2	255	255	255	510	510				63	1	255	255	255	255	255
	12	3	255	255	255	765	765				64	10433	255	255	255	2660415	2660415
	13	1	255	255	255	255	255				65	1	255	255	255	255	255
	14	1	255	255	255	255	255				66	1	255	255	255	255	255
	15	1	255	255	255	255	255				67	1	255	255	255	255	255
	16	1	255	255	255	255	255				68	2	255	255	255	510	510
	17	1	255	255	255	255	255				69	1	255	255	255	255	255
	18	7	255	255	255	1785	1785				70	1	255	255	255	255	255
	19	1	255	255	255	255	255				71	1	255	255	255	255	255
	20	2	255	255	255	510	510				72	1	255	255	255	255	255
	21	1	255	255	255	255	255				73	1	255	255	255	255	255
	22	341	255	255	255	86955	86955				74	1	255	255	255	255	255
	23	36	255	255	255	9180	9180				75	1	255	255	255	255	255
	24	21	255	255	255	5355	5355				76	1	255	255	255	255	255
	25	3	255	255	255	765	765				77	3	255	255	255	765	765
	26	1	255	255	255	255	255				78	1	255	255	255	255	255
	27	344	255	255	255	87720	87720				79	1	255	255	255	255	255
	28	1	255	255	255	255	255				80	2	255	255	255	510	510
	29	1	255	255	255	255	255				81	1	255	255	255	255	255
	30	1	255	255	255	255	255				82	2	255	255	255	510	510
	31	2	255	255	255	510	510				83	1	255	255	255	255	255
	32	10	255	255	255	2550	2550				84	2	255	255	255	510	510
	33	1	255	255	255	255	255				85	4	255	255	255	1020	1020
	34	1	255	255	255	255	255				86	2	255	255	255	510	510
	35	2	255	255	255	510	510				87	1	255	255	255	255	255
	36	1	255	255	255	255	255				88	1	255	255	255	255	255
	37	1	255	255	255	255	255				89	1	255	255	255	255	255
	38	1	255	255	255	255	255				90	1	255	255	255	255	255
	39	1	255	255	255	255	255				91	1	255	255	255	255	255
	40	52	255	255	255	13260	13260				92	1	255	255	255	255	255
	41	2	255	255	255	510	510				93	5	255	255	255	1275	1275
	42	1	255	255	255	255	255				94	1	255	255	255	255	255
	43	3	255	255	255	765	765				95	9	255	255	255	2295	2295
	44	1	255	255	255	255	255				96	3	255	255	255	765	765
	45	1	255	255	255	255	255				97	1	255	255	255	255	255
	46	12	255	255	255	3060	3060				98	1	255	255	255	255	255
	47	1	255	255	255	255	255				99	1	255	255	255	255	255
	48	1	255	255	255	255	255				100	1	255	255	255	255	255
	49	1	255	255	255	255	255				101	4	255	255	255	1020	1020
	50	1	255	255	255	255	255				102	19	255	255	255	4845	4845
	51	3	255	255	255	765	765				103	96	255	255	255	24480	24480
	52	204	255	255	255	52020	52020				104	1	255	255	255	255	255
	53	2	255	255	255	510	510				105	1	255	255	255	255	255
	54	1	255	255	255	255	255				106	1	255	255	255	255	255
	55	1	255	255	255	255	255				107	4	255	255	255	1020	1020
	56	1	255	255	255	255	255				108	1	255	255	255	255	255
	57	1	255	255	255	255	255				109	4	255	255	255	1020	1020
	58	1	255	255	255	255	255				110	1	255	255	255	255	255
	59	36	255	255	255	9180	9180				111	2	255	255	255	510	510
	60	2	255	255	255	510	510				112	2	255	255	255	510	510
	61	1	255	255	255	255	255				113	1	255	255	255	255	255
	62	12	255	255	255	3060	3060				114	1	255	255	255	255	255
	63	1	255	255	255	255	255				115	1	255	255	255	255	255
	64	361	255	255	255	92055	92055				116	2	255	255	255	510	510
	65	1	255	255	255	255	255				117	1	255	255	255	255	255
	1	120512	255	255	255	30730560	30730560				118	1	255	255	255	255	255
	2	103	255	255	255	26265	26265				119	1	255	255	255	255	255
	3	41	255	255	255	10455	10455				120	1	255	255	255	255	255
	4	9	255	255	255	2295	2295				121	1	255	255	255	255	255
	5	408	255	255	255	104040	104040				122	1	255	255	255	255	255
	6	5	255	255	255	1275	1275				123	1	255	255	255	255	255
	7	337	255	255	255	85935	85935				124	8	255	255	255	2040	2040
	8	3	255	255	255	765	765				125	1	255	255	255	255	255
	9	101	255	255	255	25755	25755				126	1	255	255	255	255	255
	10	2	255	255	255	510	510				127	1	255	255	255	255	255
	11	16	255	255	255	4080	4080				128	1	255	255	255	255	255
	12	7	255	255	255	1785	1785				129	2	255	255	255	510	510
	13	5	255	255	255	1275	1275				130	1	255	255	255	255	255
	14	2	255	255	255	510	510				131	1	255	255	255	255	255
	15	14	255	255	255	3570	3570				132	1	255	255	255	255	255
	16	3	255	255	255	765	765				133	1	255	255	255	255	255
	17	2	255	255	255	510	510				134	1	255	255	255	255	255
	18	45	255	255	255	11475	11475				135	1	255	255	255	255	255
	19	2	255	255	255	510	510				136	1	255	255	255	255	255
	20	27	255	255	255	6885	6885				137	1	255	255	255	255	255
	21	3	255	255	255	765	765				138	1	255	255	255	255	255
	22	83	255	255	255	21165	21165				139	1	255	255	255	255	255
	23	5	255	255	255	1275	1275				140	1	255	255	255	255	255
	24	189	255	255	255	48195	48195				141	8	255	255	255	2040	2040
	25	258	255	255	255	65790	65790				142	4	255	255	255	1020	1020
	26	21	255	255	255	5355	5355				143	1	255	255	255	255	255
	27	4	255	255	255	1020	1020				144	1	255	255	255	255	255
	28	627	255	255	255	159885	159885				145	1	255	255	255	255	255
	29	25	255	255	255	6375	6375				146	1	255	255	255	255	255
	30	29	255	255	255	7395	7395				147	1	255	255	255	255	255
	31	25	255	255	255	6375	6375				148	1	255	255	255	255	255
	32	217	255	255	255	55335	55335				149	3	255	255	255	765	765
	33	4	255	255	255	1020	1020				150	1	255	255	255	255	255
	34	2	255	255	255	510	510				151	1	255	255	255	255	255
	35	4	255	255	255	1020	1020				152	6	255	255	255	1530	1530
	36	210	255	255	255	53550	53550				153	1	255	255	255	255	255
	37	179	255	255	255	45645	45645				154	50	255	255	255	12750	12750
	38	18	255	255	255	4590	4590				155	1	255	255	255	255	255
	39	2	255	255	255	510	510				156	1	255	255	255	255	255
	40	101	255	255	255	25755	25755				157	1	255	255	255	255	255
	41	2	255	255	255	510	510				158	1	255	255	255	255	255
	42	167	255	255	255	42585	42585				159	5	255	255	255	1275	1275
	43	2	255	255	255	510	510				160	1	255	255	255	255	255
	44	5	255	255	255	1275	1275				161	1	255	255	255	255	255
	45	32	255	255	255	8160	8160				162	2	255	255	255	510	510
	46	3	255	255	255	765	765				163	1	255	255	255	255	255
	47	2	255	255	255	510	510				164	2	255	255	255	510	510
	48	4	255	255	255	1020	1020				165	1	255	255	255	255	255
	49	20	255	255	255	5100	5100				166	1	255	255	255	255	255
	50	4	255	255	255	1020	1020				167	1	255	255	255	255	255
	51	6	255	255	255	1530	1530				168	1	255	255	255	255	255
	52	2	255	255	255	510	510				169	1	255	255	255	255	255
	53	216	255	255	255	55080	55080				170	1	255	255	255	255	255
	54	2	255	255	255	510	510				171	3	255	255	255	765	765
	55	2	255	255	255	510	510				172	1	255	255	255	255	255
	56	2	255	255	255	510	510				173	1	255	255	255	255	255
	57	24	255	255	255	6120	6120				174	1	255	255	255	255	255
	58	6	255	255	255	1530	1530				175	1	255	255	255	255	255
	59	2	255	255	255	510	510				176	1	255	255	255	255	255
	60	2	255	255	255	510	510				177	1	255	255	255	255	255
	61	3	255	255	255	765	765				178	2	255	255	255	510	510
	62	2	255	255	255	510	510				179	2	255	255	255	510	510
	1	106929	255	255	255	27266895	27266895				180	1	255	255	255	255	255
	2	269	255	255	255	68595	68595				181	6	255	255	255	1530	1530
	3	152	255	255	255	38760	38760				182	1	255	255	255	255	255
	4	179	255	255	255	45645	45645				183	6	255	255	255	1530	1530
	5	32	255	255	255	8160	8160				184	1	255	255	255	255	255
	6	2	255	255	255	510	510				185	1	255	255	255	255	255
	7	10	255	255	255	2550	2550				186	2	255	255	255	510	510
	8	6	255	255	255	1530	1530				187	1	255	255	255	255	255
	9	2	255	255	255	510	510				188	1	255	255	255	255	255
	10	217	255	255	255	55335	55335				189	2	255	255	255	510	510
	11	4	255	255	255	1020	1020				190	1	255	255	255	255	255
	12	2	255	255	255	510	510				191	1	255	255	255	255	255
	13	220	255	255	255	56100	56100				192	1	255	255	255	255	255
	14	79	255	255	255	20145	20145				193	1	255	255	255	255	255
	15	97	255	255	255	24735	24735				194	1	255	255	255	255	255
	16	38	255	255	255	9690	9690				195	2	255	255	255	510	510
	17	186	255	255	255	47430	47430				196	2	255	255	255	510	510
	18	40	255	255	255	10200	10200				197	1	255	255	255	255	255
	19	17	255	255	255	4335	4335				198	1	255	255	255	255	255
	20	36	255	255	255	9180	9180				199	1	255	255	255	255	255
	21	20	255	255	255	5100	5100				200	1	255	255	255	255	255
	22	11	255	255	255	2805	2805				201	1	255	255	255	255	255
	23	9	255	255	255	2295	2295				202	11	255	255	255	2805	2805
	24	89	255	255	255	22695	22695				203	29	255	255	255	7395	7395
	25	2	255	255	255	510	510				204	1	255	255	255	255	255
	26	4	255	255	255	1020	1020				205	2	255	255	255	510	510
	27	4	255	255	255	1020	1020				206	1	255	255	255	255	255
	28	2	255	255	255	510	510				207	1	255	255	255	255	255
	29	216	255	255	255	55080	55080				208	2	255	255	255	510	510
	30	3	255	255	255	765	765				209	1	255	255	255	255	255
	31	10	255	255	255	2550	2550				210	1	255	255	255	255	255
	32	16	255	255	255	4080	4080				211	1	255	255	255	255	255
	33	6	255	255	255	1530	1530				212	5	255	255	255	1275	1275
	34	434	255	255	255	110670	110670				213	1	255	255	255	255	255
	35	2	255	255	255	510	510				214	1	255	255	255	255	255
	36	2	255	255	255	510	510				215	1	255	255	255	255	255
	37	8	255	255	255	2040	2040				216	1	255	255	255	255	255
	38	2	255	255	255	510	510				217	1	255	255	255	255	255
	39	2	255	255	255	510	510				218	1	255	255	255	255	255
	40	47	255	255	255	11985	11985				219	1	255	255	255	255	255
	41	89	255	255	255	22695	22695				220	1	255	255	255	255	255
	42	10	255	255	255	2550	2550				221	1	255	255	255	255	255
	43	2	255	255	255	510	510				222	5	255	255	255	1275	1275
	44	2	255	255	255	510	510				223	1	255	255	255	255	255
	45	2	255	255	255	510	510				224	3	255	255	255	765	765
	46	23	255	255	255	5865	5865				225	1	255	255	255	255	255
	47	179	255	255	255	45645	45645				226	1	255	255	255	255	255
	48	25	255	255	255	6375	6375				227	4	255	255	255	1020	1020
	49	93	255	255	255	23715	23715				228	1	255	255	255	255	255
	50	14	255	255	255	3570	3570				229	1	255	255	255	255	255
	51	11	255	255	255	2805	2805				230	1	255	255	255	255	255
	52	2	255	255	255	510	510				231	1	255	255	255	255	255
	53	3	255	255	255	765	765				232	1	255	255	255	255	255
	54	169	255	255	255	43095	43095				233	1	255	255	255	255	255
	55	2	255	255	255	510	510				234	1	255	255	255	255	255
	56	5	255	255	255	1275	1275				235	1	255	255	255	255	255
	1	112484	255	255	255	28683420	28683420				236	1	255	255	255	255	255
	2	7	255	255	255	1785	1785				237	2	255	255	255	510	510
	3	4	255	255	255	1020	1020				238	1	255	255	255	255	255
	4	147	255	255	255	37485	37485				239	1	255	255	255	255	255
	5	16	255	255	255	4080	4080				240	2	255	255	255	510	510
	6	6	255	255	255	1530	1530				241	1	255	255	255	255	255
	7	67	255	255	255	17085	17085				242	1	255	255	255	255	255
	8	7	255	255	255	1785	1785				243	1	255	255	255	255	255
	9	222	255	255	255	56610	56610				244	1	255	255	255	255	255
	10	185	255	255	255	47175	47175				245	2	255	255	255	510	510
	11	15	255	255	255	3825	3825				246	25	255	255	255	6375	6375
	12	10	255	255	255	2550	2550				247	2	255	255	255	510	510
	13	4	255	255	255	1020	1020				248	2	255	255	255	510	510
	14	41	255	255	255	10455	10455				249	1	255	255	255	255	255
	15	27	255	255	255	6885	6885				250	1	255	255	255	255	255
	16	33	255	255	255	8415	8415				251	3	255	255	255	765	765
	17	8	255	255	255	2040	2040				252	2	255	255	255	510	510
	18	15	255	255	255	3825	3825				253	1	255	255	255	255	255
	19	196	255	255	255	49980	49980				254	1	255	255	255	255	255
	20	4	255	255	255	1020	1020				255	1	255	255	255	255	255
	21	201	255	255	255	51255	51255				256	1	255	255	255	255	255
	22	997	255	255	255	254235	254235				257	1	255	255	255	255	255
	23	2	255	255	255	510	510				258	1	255	255	255	255	255
	24	34	255	255	255	8670	8670				259	1	255	255	255	255	255
	25	298	255	255	255	75990	75990				260	48	255	255	255	12240	12240
	26	24	255	255	255	6120	6120				261	1	255	255	255	255	255
	27	3	255	255	255	765	765				262	1	255	255	255	255	255
	28	5	255	255	255	1275	1275				263	1	255	255	255	255	255
	29	9	255	255	255	2295	2295				264	1	255	255	255	255	255
	30	2	255	255	255	510	510				265	1	255	255	255	255	255
	31	16	255	255	255	4080	4080				266	1	255	255	255	255	255
	32	7	255	255	255	1785	1785				267	1	255	255	255	255	255
	33	23	255	255	255	5865	5865				268	1	255	255	255	255	255
	34	16	255	255	255	4080	4080				269	1	255	255	255	255	255
	35	23	255	255	255	5865	5865				270	2	255	255	255	510	510
	36	2	255	255	255	510	510				271	1	255	255	255	255	255
	37	5	255	255	255	1275	1275				272	1	255	255	255	255	255
	38	15	255	255	255	3825	3825				273	1	255	255	255	255	255
	39	6	255	255	255	1530	1530				274	1	255	255	255	255	255
	40	8	255	255	255	2040	2040				275	1	255	255	255	255	255
	41	9	255	255	255	2295	2295				276	2	255	255	255	510	510
	42	4	255	255	255	1020	1020				277	1	255	255	255	255	255
	43	32	255	255	255	8160	8160				278	1	255	255	255	255	255
	44	2	255	255	255	510	510				279	1	255	255	255	255	255
	45	10	255	255	255	2550	2550				280	1	255	255	255	255	255
	46	5	255	255	255	1275	1275				281	1	255	255	255	255	255
	47	25	255	255	255	6375	6375				282	1	255	255	255	255	255
	48	202	255	255	255	51510	51510				283	4	255	255	255	1020	1020
	49	2	255	255	255	510	510				284	3	255	255	255	765	765
											285	1	255	255	255	255	255
											286	2	255	255	255	510	510
											287	5	255	255	255	1275	1275
											288	1	255	255	255	255	255
											289	71	255	255	255	18105	18105
											290	1	255	255	255	255	255
											291	1	255	255	255	255	255
											292	1	255	255	255	255	255
											293	1	255	255	255	255	255
											294	1	255	255	255	255	255
											295	1	255	255	255	255	255
											296	1	255	255	255	255	255
											297	1	255	255	255	255	255
											298	1	255	255	255	255	255
											299	1	255	255	255	255	255
											300	1	255	255	255	255	255
											301	1	255	255	255	255	255
											302	1	255	255	255	255	255
											303	1	255	255	255	255	255
											304	1	255	255	255	255	255
											305	1	255	255	255	255	255
											306	1	255	255	255	255	255
											307	1	255	255	255	255	255
											308	1	255	255	255	255	255
											309	2	255	255	255	510	510
											310	1	255	255	255	255	255
											311	1	255	255	255	255	255
											312	1	255	255	255	255	255
											313	1	255	255	255	255	255
											314	1	255	255	255	255	255
											315	1	255	255	255	255	255
											316	1	255	255	255	255	255
											317	2	255	255	255	510	510
											318	1	255	255	255	255	255
											319	2	255	255	255	510	510
											320	1	255	255	255	255	255
											321	1	255	255	255	255	255
											322	1	255	255	255	255	255
											323	1	255	255	255	255	255
											324	1	255	255	255	255	255
											325	2	255	255	255	510	510
											326	1	255	255	255	255	255
											327	1	255	255	255	255	255
											328	1	255	255	255	255	255
											329	1	255	255	255	255	255
											330	249	255	255	255	63495	63495
											331	1	255	255	255	255	255
											332	1	255	255	255	255	255
											333	1	255	255	255	255	255
											334	2	255	255	255	510	510
											335	1	255	255	255	255	255
											336	1	255	255	255	255	255
											337	1	255	255	255	255	255
											338	1	255	255	255	255	255
											339	1	255	255	255	255	255
											340	7	255	255	255	1785	1785
											341	1	255	255	255	255	255
											342	3	255	255	255	765	765
											343	287	255	255	255	73185	73185
											344	1	255	255	255	255	255
											345	1	255	255	255	255	255
											346	1	255	255	255	255	255
											347	2	255	255	255	510	510
											348	1	255	255	255	255	255
											349	1	255	255	255	255	255
											350	1	255	255	255	255	255
											351	1	255	255	255	255	255
											352	1	255	255	255	255	255
											353	1	255	255	255	255	255
											354	1	255	255	255	255	255
											355	1	255	255	255	255	255
											356	1	255	255	255	255	255
											357	1	255	255	255	255	255
											358	1	255	255	255	255	255
											359	1	255	255	255	255	255
											360	1	255	255	255	255	255
											361	1	255	255	255	255	255
											362	1	255	255	255	255	255
											363	1	255	255	255	255	255
											364	1	255	255	255	255	255
											365	14	255	255	255	3570	3570
											366	2	255	255	255	510	510
											367	1	255	255	255	255	255
											368	1	255	255	255	255	255
											369	2	255	255	255	510	510
											370	1	255	255	255	255	255
											371	1	255	255	255	255	255
											372	13	255	255	255	3315	3315
											373	1	255	255	255	255	255
											374	10	255	255	255	2550	2550
											375	1	255	255	255	255	255
											376	1	255	255	255	255	255
											377	1	255	255	255	255	255
											378	1	255	255	255	255	255
											379	1	255	255	255	255	255
											380	16	255	255	255	4080	4080
											381	1	255	255	255	255	255
											382	1	255	255	255	255	255
											383	1	255	255	255	255	255
											384	1	255	255	255	255	255
											385	1	255	255	255	255	255
											386	1	255	255	255	255	255
											387	1	255	255	255	255	255
											388	69	255	255	255	17595	17595
											389	1	255	255	255	255	255
											390	5	255	255	255	1275	1275
											391	1	255	255	255	255	255
											392	1	255	255	255	255	255
											393	2	255	255	255	510	510
											394	9	255	255	255	2295	2295
											395	1	255	255	255	255	255
											396	1	255	255	255	255	255
											397	1	255	255	255	255	255
											398	1	255	255	255	255	255
											399	1	255	255	255	255	255
											400	1	255	255	255	255	255
											401	1	255	255	255	255	255
											402	1	255	255	255	255	255
											403	1	255	255	255	255	255
											404	2	255	255	255	510	510
											405	1	255	255	255	255	255
											406	1	255	255	255	255	255
											407	1	255	255	255	255	255
											408	1	255	255	255	255	255
											409	1	255	255	255	255	255
											410	1	255	255	255	255	255
											411	1	255	255	255	255	255
											412	27	255	255	255	6885	6885
											413	1	255	255	255	255	255
											414	1	255	255	255	255	255
											415	2	255	255	255	510	510
											416	3	255	255	255	765	765
											417	2	255	255	255	510	510
											418	1	255	255	255	255	255
											419	1	255	255	255	255	255
											420	2	255	255	255	510	510
											421	1	255	255	255	255	255
											422	1	255	255	255	255	255
											423	1	255	255	255	255	255
											424	2	255	255	255	510	510
											425	2	255	255	255	510	510
											426	2	255	255	255	510	510
											427	6	255	255	255	1530	1530
											428	1	255	255	255	255	255
											429	1	255	255	255	255	255
											430	1	255	255	255	255	255
											431	1	255	255	255	255	255
											432	1	255	255	255	255	255
											433	1	255	255	255	255	255
											434	1	255	255	255	255	255
											435	1	255	255	255	255	255
											436	1	255	255	255	255	255
											437	1	255	255	255	255	255
											438	1	255	255	255	255	255
											439	1	255	255	255	255	255
											440	144	255	255	255	36720	36720
											441	1	255	255	255	255	255
											442	1	255	255	255	255	255
											443	2	255	255	255	510	510
											444	1	255	255	255	255	255
											445	1	255	255	255	255	255
											446	1	255	255	255	255	255
											447	1	255	255	255	255	255
											448	1	255	255	255	255	255
											449	1	255	255	255	255	255
											450	1	255	255	255	255	255
											451	1	255	255	255	255	255
											452	1	255	255	255	255	255
											453	1	255	255	255	255	255
											454	1	255	255	255	255	255
											455	1	255	255	255	255	255
											456	1	255	255	255	255	255
											457	1	255	255	255	255	255
											458	1	255	255	255	255	255
											459	1	255	255	255	255	255
											460	1	255	255	255	255	255
											461	1	255	255	255	255	255
											462	1	255	255	255	255	255
											463	2	255	255	255	510	510
											464	1	255	255	255	255	255
											465	1	255	255	255	255	255
											466	1	255	255	255	255	255
											467	1	255	255	255	255	255
											468	2	255	255	255	510	510
											469	2	255	255	255	510	510
											470	1	255	255	255	255	255
											471	1	255	255	255	255	255
											472	1	255	255	255	255	255
											473	1	255	255	255	255	255
											474	1	255	255	255	255	255
											475	1	255	255	255	255	255
											476	18	255	255	255	4590	4590
											477	214	255	255	255	54570	54570
											478	1	255	255	255	255	255
											479	46	255	255	255	11730	11730
											480	1	255	255	255	255	255
											481	1	255	255	255	255	255
											482	1	255	255	255	255	255
											483	2	255	255	255	510	510
											484	1	255	255	255	255	255
											485	1	255	255	255	255	255
											486	1	255	255	255	255	255
											487	2	255	255	255	510	510
											488	2	255	255	255	510	510
											489	2	255	255	255	510	510
											490	11	255	255	255	2805	2805
											491	1	255	255	255	255	255
											492	1	255	255	255	255	255
											493	1	255	255	255	255	255
											494	1	255	255	255	255	255
											495	1	255	255	255	255	255
											496	1	255	255	255	255	255
											497	1	255	255	255	255	255
											498	1	255	255	255	255	255
											499	1	255	255	255	255	255
											500	1	255	255	255	255	255
											501	2	255	255	255	510	510
											502	2	255	255	255	510	510
											503	1	255	255	255	255	255
											504	1	255	255	255	255	255
											505	1	255	255	255	255	255
											506	1	255	255	255	255	255
											507	3	255	255	255	765	765
											508	1	255	255	255	255	255
											509	1	255	255	255	255	255
											510	1	255	255	255	255	255
											511	1	255	255	255	255	255
											512	1	255	255	255	255	255
											513	1	255	255	255	255	255
											514	1	255	255	255	255	255
											515	12	255	255	255	3060	3060
											516	1	255	255	255	255	255
											517	2	255	255	255	510	510
											518	1	255	255	255	255	255
											519	1	255	255	255	255	255
											520	1	255	255	255	255	255
											521	1	255	255	255	255	255
											522	1	255	255	255	255	255
											523	1	255	255	255	255	255
											524	2	255	255	255	510	510
											525	1	255	255	255	255	255
											526	1	255	255	255	255	255
											527	1	255	255	255	255	255
											528	1	255	255	255	255	255
											529	1	255	255	255	255	255
											530	1	255	255	255	255	255
											531	1	255	255	255	255	255
											532	1	255	255	255	255	255
											533	8	255	255	255	2040	2040
											534	1	255	255	255	255	255
											535	1	255	255	255	255	255
											536	1	255	255	255	255	255
											537	1	255	255	255	255	255
											538	1	255	255	255	255	255
											539	1	255	255	255	255	255
											540	1	255	255	255	255	255
											541	1	255	255	255	255	255
											542	1	255	255	255	255	255
											543	1	255	255	255	255	255
											544	1	255	255	255	255	255
											545	2	255	255	255	510	510
											546	1	255	255	255	255	255
											547	1	255	255	255	255	255
											548	1	255	255	255	255	255
											549	1	255	255	255	255	255
											550	1	255	255	255	255	255
											551	2	255	255	255	510	510
											552	3	255	255	255	765	765
											553	1	255	255	255	255	255
											554	1	255	255	255	255	255
											555	1	255	255	255	255	255
											556	1	255	255	255	255	255
											557	1	255	255	255	255	255
											558	1	255	255	255	255	255
											559	1	255	255	255	255	255
											560	1	255	255	255	255	255
											561	1	255	255	255	255	255
											562	1	255	255	255	255	255
											563	7	255	255	255	1785	1785
											564	1	255	255	255	255	255
											565	1	255	255	255	255	255
											566	1	255	255	255	255	255
											567	1	255	255	255	255	255
											568	1	255	255	255	255	255
											569	1	255	255	255	255	255
											570	1	255	255	255	255	255
											571	2	255	255	255	510	510
											572	1	255	255	255	255	255
											573	954	255	255	255	243270	243270
											574	1	255	255	255	255	255
											575	1	255	255	255	255	255
											576	1	255	255	255	255	255
											577	1	255	255	255	255	255
											578	1	255	255	255	255	255
											579	1	255	255	255	255	255
											580	1	255	255	255	255	255
											581	1	255	255	255	255	255
											582	1	255	255	255	255	255
											583	10	255	255	255	2550	2550
											584	299	255	255	255	76245	76245
											585	1	255	255	255	255	255
											586	2	255	255	255	510	510
											587	37	255	255	255	9435	9435
											588	1	255	255	255	255	255
											589	2	255	255	255	510	510
											590	1	255	255	255	255	255
											591	1	255	255	255	255	255
											592	1	255	255	255	255	255
											593	1	255	255	255	255	255
											594	1	255	255	255	255	255
											595	2	255	255	255	510	510
											596	1	255	255	255	255	255
											597	1	255	255	255	255	255
											598	1	255	255	255	255	255
											599	1	255	255	255	255	255
											600	4	255	255	255	1020	1020
											601	1	255	255	255	255	255
											602	1	255	255	255	255	255
											603	1	255	255	255	255	255
											604	1	255	255	255	255	255
											605	1	255	255	255	255	255
											606	1	255	255	255	255	255
											607	1	255	255	255	255	255
											608	3	255	255	255	765	765
											609	2	255	255	255	510	510
											610	1	255	255	255	255	255
											611	1	255	255	255	255	255
											612	4	255	255	255	1020	1020
											613	75	255	255	255	19125	19125
											614	3	255	255	255	765	765
											615	1	255	255	255	255	255
											616	1	255	255	255	255	255
											617	1	255	255	255	255	255
											618	1	255	255	255	255	255
											619	10	255	255	255	2550	2550
											620	1	255	255	255	255	255
											621	1	255	255	255	255	255
											622	1	255	255	255	255	255
											623	364	255	255	255	92820	92820
											624	1	255	255	255	255	255
											625	1	255	255	255	255	255
											626	1	255	255	255	255	255
											627	1	255	255	255	255	255
											628	16	255	255	255	4080	4080
											629	1	255	255	255	255	255
											630	1	255	255	255	255	255
											631	1	255	255	255	255	255
											632	1	255	255	255	255	255
											633	1	255	255	255	255	255
											634	1	255	255	255	255	255
											635	1	255	255	255	255	255
											636	1	255	255	255	255	255
											637	1	255	255	255	255	255
											638	1	255	255	255	255	255
											639	1	255	255	255	255	255
											640	1	255	255	255	255	255
											641	1	255	255	255	255	255
											642	1	255	255	255	255	255
											643	1	255	255	255	255	255
											644	1	255	255	255	255	255
											645	1	255	255	255	255	255
											646	2	255	255	255	510	510
											647	1	255	255	255	255	255
											648	1	255	255	255	255	255
											649	1	255	255	255	255	255
											650	1	255	255	255	255	255
											651	2	255	255	255	510	510
											652	2	255	255	255	510	510
											653	1	255	255	255	255	255
											654	1	255	255	255	255	255
											655	1	255	255	255	255	255
											656	1	255	255	255	255	255
											657	1	255	255	255	255	255
											658	1	255	255	255	255	255
											659	2	255	255	255	510	510
											660	1	255	255	255	255	255
											661	1	255	255	255	255	255
											662	1	255	255	255	255	255
											663	1	255	255	255	255	255
											664	1	255	255	255	255	255
											665	4	255	255	255	1020	1020
											666	13	255	255	255	3315	3315
											667	1	255	255	255	255	255
											668	1	255	255	255	255	255
											669	1	255	255	255	255	255
											670	3	255	255	255	765	765
											671	1	255	255	255	255	255
											672	1	255	255	255	255	255
											673	1	255	255	255	255	255
											674	1	255	255	255	255	255
											675	1	255	255	255	255	255
											676	1	255	255	255	255	255
											677	2	255	255	255	510	510
											678	66	255	255	255	16830	16830
											679	1	255	255	255	255	255
											680	2	255	255	255	510	510
											681	1	255	255	255	255	255
											682	1	255	255	255	255	255
											683	1	255	255	255	255	255
											684	1	255	255	255	255	255
											685	2	255	255	255	510	510
											686	2	255	255	255	510	510
											687	1	255	255	255	255	255
											688	1	255	255	255	255	255
											689	2	255	255	255	510	510
											690	1	255	255	255	255	255
											691	1	255	255	255	255	255
											692	1	255	255	255	255	255
											693	18	255	255	255	4590	4590
											694	1	255	255	255	255	255
											695	1	255	255	255	255	255
											696	1	255	255	255	255	255
											697	1	255	255	255	255	255
											698	1	255	255	255	255	255
											699	1	255	255	255	255	255
											700	2	255	255	255	510	510
											701	8	255	255	255	2040	2040
											702	1	255	255	255	255	255
											703	2	255	255	255	510	510
											704	1	255	255	255	255	255
											705	1	255	255	255	255	255
											706	1	255	255	255	255	255
											707	1	255	255	255	255	255
											708	2	255	255	255	510	510
											709	1	255	255	255	255	255
											710	2	255	255	255	510	510
											711	1	255	255	255	255	255
											712	3	255	255	255	765	765
											713	3	255	255	255	765	765
											714	1	255	255	255	255	255
											715	1	255	255	255	255	255
											716	4	255	255	255	1020	1020
											717	5	255	255	255	1275	1275
											718	1	255	255	255	255	255
											719	1	255	255	255	255	255
											720	1	255	255	255	255	255
											721	1	255	255	255	255	255
											722	3	255	255	255	765	765
											723	1	255	255	255	255	255
											724	1	255	255	255	255	255
											725	1	255	255	255	255	255
											726	1	255	255	255	255	255
											727	4	255	255	255	1020	1020
											728	1	255	255	255	255	255
											729	2	255	255	255	510	510
											730	6	255	255	255	1530	1530
											731	2	255	255	255	510	510
											732	1	255	255	255	255	255
											733	2	255	255	255	510	510
											734	3	255	255	255	765	765
											735	127	255	255	255	32385	32385
											736	3	255	255	255	765	765
											737	1	255	255	255	255	255
											738	2	255	255	255	510	510
											739	10	255	255	255	2550	2550
											740	1	255	255	255	255	255
											741	17	255	255	255	4335	4335
											742	1	255	255	255	255	255
											743	1	255	255	255	255	255
											744	2	255	255	255	510	510
											745	1	255	255	255	255	255
											746	1	255	255	255	255	255
											747	5	255	255	255	1275	1275
											748	1	255	255	255	255	255
											749	1	255	255	255	255	255
											750	5	255	255	255	1275	1275
											751	1	255	255	255	255	255
											752	3	255	255	255	765	765
											753	1	255	255	255	255	255
											754	109	255	255	255	27795	27795
											755	1	255	255	255	255	255
											756	1	255	255	255	255	255
											757	2	255	255	255	510	510
											758	1	255	255	255	255	255
											759	1	255	255	255	255	255
											760	3	255	255	255	765	765
											761	1	255	255	255	255	255
											762	1	255	255	255	255	255
											763	2	255	255	255	510	510
											764	1	255	255	255	255	255
											765	5	255	255	255	1275	1275
											766	1	255	255	255	255	255
											767	1	255	255	255	255	255
											768	2	255	255	255	510	510
											769	1	255	255	255	255	255
											770	1	255	255	255	255	255
											771	1	255	255	255	255	255
											772	1	255	255	255	255	255
											773	1	255	255	255	255	255
											774	1	255	255	255	255	255
											775	1	255	255	255	255	255
											776	1	255	255	255	255	255
											777	2	255	255	255	510	510
											778	7	255	255	255	1785	1785
											779	1	255	255	255	255	255
											780	4	255	255	255	1020	1020
											781	4	255	255	255	1020	1020
											782	2	255	255	255	510	510
											783	1	255	255	255	255	255
											784	1	255	255	255	255	255
											785	1	255	255	255	255	255
											786	1	255	255	255	255	255
											787	1	255	255	255	255	255
											788	1	255	255	255	255	255
											789	1	255	255	255	255	255
											790	3	255	255	255	765	765
											791	1	255	255	255	255	255
											792	1	255	255	255	255	255
											793	1	255	255	255	255	255
											794	1	255	255	255	255	255
											795	1	255	255	255	255	255
											796	1	255	255	255	255	255
											797	1	255	255	255	255	255
											798	3	255	255	255	765	765
											799	1	255	255	255	255	255
											800	1	255	255	255	255	255
											801	1	255	255	255	255	255
											802	1	255	255	255	255	255
											803	1	255	255	255	255	255
											804	1	255	255	255	255	255
											805	1	255	255	255	255	255
											806	1	255	255	255	255	255
											807	2	255	255	255	510	510
											808	1	255	255	255	255	255
											809	2	255	255	255	510	510
											810	2	255	255	255	510	510
											811	4	255	255	255	1020	1020
											812	1	255	255	255	255	255
											813	3	255	255	255	765	765
											814	3	255	255	255	765	765
											815	9	255	255	255	2295	2295
											816	2	255	255	255	510	510
											817	1	255	255	255	255	255
											818	3	255	255	255	765	765
											819	2	255	255	255	510	510
											820	3	255	255	255	765	765
											821	34	255	255	255	8670	8670
											822	1	255	255	255	255	255
											823	1	255	255	255	255	255
											824	2	255	255	255	510	510
											825	3	255	255	255	765	765
											826	1	255	255	255	255	255
											827	2	255	255	255	510	510
											828	1	255	255	255	255	255
											829	1	255	255	255	255	255
											830	5	255	255	255	1275	1275
											831	1	255	255	255	255	255
											832	6	255	255	255	1530	1530
											833	1	255	255	255	255	255
											834	5	255	255	255	1275	1275
											835	1	255	255	255	255	255
											836	1	255	255	255	255	255
											837	2	255	255	255	510	510
											838	1	255	255	255	255	255
											839	4	255	255	255	1020	1020
											840	4	255	255	255	1020	1020
											841	1	255	255	255	255	255
											842	2	255	255	255	510	510
											843	1	255	255	255	255	255
											844	1	255	255	255	255	255
											845	4	255	255	255	1020	1020
											846	1	255	255	255	255	255
											847	11	255	255	255	2805	2805
											848	1844	255	255	255	470220	470220
											849	1	255	255	255	255	255
											850	19	255	255	255	4845	4845
											851	1	255	255	255	255	255
											852	2	255	255	255	510	510
											853	3	255	255	255	765	765
											854	1	255	255	255	255	255
											855	1	255	255	255	255	255
											856	1	255	255	255	255	255
											857	1	255	255	255	255	255
											858	1	255	255	255	255	255
											859	1	255	255	255	255	255
											860	2	255	255	255	510	510
											861	3	255	255	255	765	765
											862	1	255	255	255	255	255
											863	1	255	255	255	255	255
											864	3	255	255	255	765	765
											865	3	255	255	255	765	765
											866	1	255	255	255	255	255
											867	1	255	255	255	255	255
											868	1	255	255	255	255	255
											869	2	255	255	255	510	510
											870	1	255	255	255	255	255
											871	1	255	255	255	255	255
											872	1	255	255	255	255	255
											873	1	255	255	255	255	255
											874	6	255	255	255	1530	1530
											875	1	255	255	255	255	255
											876	3	255	255	255	765	765
											877	3	255	255	255	765	765
											878	2	255	255	255	510	510
											879	1	255	255	255	255	255
											880	1	255	255	255	255	255
											881	1	255	255	255	255	255
											882	1	255	255	255	255	255
											883	1	255	255	255	255	255
											884	1	255	255	255	255	255
											885	1	255	255	255	255	255
											886	1	255	255	255	255	255
											887	5	255	255	255	1275	1275
											888	1	255	255	255	255	255
											889	1	255	255	255	255	255
											890	1	255	255	255	255	255
											891	2	255	255	255	510	510
											892	42	255	255	255	10710	10710
											893	1	255	255	255	255	255
											894	3	255	255	255	765	765
											895	2	255	255	255	510	510
											896	1	255	255	255	255	255
											897	2	255	255	255	510	510
											898	1	255	255	255	255	255
											899	2	255	255	255	510	510
											900	2	255	255	255	510	510
											901	1	255	255	255	255	255
											902	1	255	255	255	255	255
											903	3	255	255	255	765	765
											904	1	255	255	255	255	255
											905	1	255	255	255	255	255
											906	2	255	255	255	510	510
											907	1	255	255	255	255	255
											908	1	255	255	255	255	255
											909	1	255	255	255	255	255
											910	2	255	255	255	510	510
											911	1	255	255	255	255	255
											912	8	255	255	255	2040	2040
											913	1	255	255	255	255	255
											914	1	255	255	255	255	255
											915	1	255	255	255	255	255
											916	1	255	255	255	255	255
											917	1	255	255	255	255	255
											918	1	255	255	255	255	255
											919	2	255	255	255	510	510
											920	2	255	255	255	510	510
											921	1	255	255	255	255	255
											922	10	255	255	255	2550	2550
											923	1	255	255	255	255	255
											924	2	255	255	255	510	510
											925	1	255	255	255	255	255
											926	1	255	255	255	255	255
											927	1	255	255	255	255	255
											928	2	255	255	255	510	510
											929	46	255	255	255	11730	11730
											930	1	255	255	255	255	255
											931	1	255	255	255	255	255
											932	1	255	255	255	255	255
											933	1	255	255	255	255	255
											934	1	255	255	255	255	255
											935	7	255	255	255	1785	1785
											936	1	255	255	255	255	255
											937	4	255	255	255	1020	1020
											938	1	255	255	255	255	255
											939	1	255	255	255	255	255
											940	1	255	255	255	255	255
											941	1	255	255	255	255	255
											942	1	255	255	255	255	255
											943	1	255	255	255	255	255
											944	1	255	255	255	255	255
											945	1	255	255	255	255	255
											946	1	255	255	255	255	255
											947	1	255	255	255	255	255
											948	1	255	255	255	255	255
											949	342	255	255	255	87210	87210
											950	1	255	255	255	255	255
											951	1	255	255	255	255	255
											952	1	255	255	255	255	255
											953	2	255	255	255	510	510
											954	2	255	255	255	510	510
											955	4	255	255	255	1020	1020
											956	73	255	255	255	18615	18615
											957	1	255	255	255	255	255
											958	1	255	255	255	255	255
											959	1	255	255	255	255	255
											960	1	255	255	255	255	255
											961	1	255	255	255	255	255
											962	1	255	255	255	255	255
											963	1	255	255	255	255	255
											964	2	255	255	255	510	510
											965	2	255	255	255	510	510
											966	1	255	255	255	255	255
											967	1	255	255	255	255	255
											968	11	255	255	255	2805	2805
											969	1	255	255	255	255	255
											970	1	255	255	255	255	255
											971	1	255	255	255	255	255
											972	1	255	255	255	255	255
											973	1	255	255	255	255	255
											974	1	255	255	255	255	255
											975	2	255	255	255	510	510
											976	1	255	255	255	255	255
											977	1	255	255	255	255	255
											978	1	255	255	255	255	255
											979	1	255	255	255	255	255
											980	219	255	255	255	55845	55845
											981	1	255	255	255	255	255
											982	1	255	255	255	255	255
											983	2	255	255	255	510	510
											984	1	255	255	255	255	255
											985	1	255	255	255	255	255
											986	1	255	255	255	255	255
											987	1	255	255	255	255	255
											988	2	255	255	255	510	510
											989	1	255	255	255	255	255
											990	2	255	255	255	510	510
											991	1	255	255	255	255	255
											992	1	255	255	255	255	255
											993	1	255	255	255	255	255
											994	7	255	255	255	1785	1785
											995	1	255	255	255	255	255
											996	1	255	255	255	255	255
											997	1	255	255	255	255	255
											998	1	255	255	255	255	255
											999	1	255	255	255	255	255
											1000	1	255	255	255	255	255
											1001	1	255	255	255	255	255
											1002	1	255	255	255	255	255
											1003	1	255	255	255	255	255
											1004	1	255	255	255	255	255
											1005	1	255	255	255	255	255
											1006	1	255	255	255	255	255
											1007	1	255	255	255	255	255
											1008	536	255	255	255	136680	136680
											1009	1	255	255	255	255	255
											1010	1	255	255	255	255	255
											1011	1	255	255	255	255	255
											1012	1	255	255	255	255	255
											1013	1	255	255	255	255	255
											1014	7	255	255	255	1785	1785
											1015	1	255	255	255	255	255
											1016	1	255	255	255	255	255
											1017	1	255	255	255	255	255
											1018	1	255	255	255	255	255
											1019	1	255	255	255	255	255
											1020	2	255	255	255	510	510
											1021	1	255	255	255	255	255
											1022	4	255	255	255	1020	1020
											1023	1	255	255	255	255	255
											1024	1	255	255	255	255	255
											1025	1	255	255	255	255	255
											1026	1	255	255	255	255	255
											1027	1	255	255	255	255	255
											1028	3	255	255	255	765	765
											1029	1	255	255	255	255	255
											1030	3	255	255	255	765	765
											1031	1	255	255	255	255	255
											1032	1	255	255	255	255	255
											1033	1	255	255	255	255	255
											1034	1	255	255	255	255	255
											1035	1	255	255	255	255	255
											1036	1	255	255	255	255	255
											1037	1	255	255	255	255	255
											1038	12	255	255	255	3060	3060
											1039	1	255	255	255	255	255
											1040	1	255	255	255	255	255
											1041	1	255	255	255	255	255
											1042	1	255	255	255	255	255
											1043	2	255	255	255	510	510
											1044	1	255	255	255	255	255
											1045	1	255	255	255	255	255
											1046	1	255	255	255	255	255
											1047	9	255	255	255	2295	2295
											1048	11	255	255	255	2805	2805
											1049	1	255	255	255	255	255
											1050	24	255	255	255	6120	6120
											1051	1	255	255	255	255	255
											1052	1	255	255	255	255	255
											1053	2	255	255	255	510	510
											1054	2	255	255	255	510	510
											1055	1	255	255	255	255	255
											1056	1	255	255	255	255	255
											1057	34	255	255	255	8670	8670
											1058	4	255	255	255	1020	1020
											1059	1	255	255	255	255	255
											1060	1	255	255	255	255	255
											1061	1	255	255	255	255	255
											1062	2	255	255	255	510	510
											1063	1	255	255	255	255	255
											1064	1	255	255	255	255	255
											1065	70	255	255	255	17850	17850
											1066	1	255	255	255	255	255
											1067	1	255	255	255	255	255
											1068	1	255	255	255	255	255
											1069	1	255	255	255	255	255
											1070	2	255	255	255	510	510
											1071	1	255	255	255	255	255
											1072	1	255	255	255	255	255
											1073	3	255	255	255	765	765
											1074	9	255	255	255	2295	2295
											1075	1	255	255	255	255	255
											1076	1	255	255	255	255	255
											1077	1	255	255	255	255	255
											1078	1	255	255	255	255	255
											1079	1	255	255	255	255	255
											1080	2	255	255	255	510	510
											1081	2	255	255	255	510	510
											1082	1	255	255	255	255	255
											1083	2	255	255	255	510	510
											1084	1	255	255	255	255	255
											1085	8	255	255	255	2040	2040
											1086	1	255	255	255	255	255
											1087	3	255	255	255	765	765
											1088	1	255	255	255	255	255
											1089	1	255	255	255	255	255
											1090	1	255	255	255	255	255
											1091	1	255	255	255	255	255
											1092	1	255	255	255	255	255
											1093	2	255	255	255	510	510
											1094	1	255	255	255	255	255
											1095	1	255	255	255	255	255
											1096	224	255	255	255	57120	57120
											1097	1	255	255	255	255	255
											1098	1	255	255	255	255	255
											1099	2	255	255	255	510	510
											1100	1	255	255	255	255	255
											1101	1	255	255	255	255	255
											1102	2	255	255	255	510	510
											1103	8	255	255	255	2040	2040
											1104	16	255	255	255	4080	4080
											1105	3	255	255	255	765	765
											1106	9	255	255	255	2295	2295
											1107	1	255	255	255	255	255
											1108	1	255	255	255	255	255
											1109	1	255	255	255	255	255
											1110	2	255	255	255	510	510
											1111	1	255	255	255	255	255
											1112	1	255	255	255	255	255
											1113	24	255	255	255	6120	6120
											1114	1	255	255	255	255	255
											1115	1	255	255	255	255	255
											1116	1	255	255	255	255	255
											1117	1	255	255	255	255	255
											1118	1	255	255	255	255	255
											1119	1	255	255	255	255	255
											1120	1	255	255	255	255	255
											1121	1	255	255	255	255	255
											1122	1	255	255	255	255	255
											1123	4	255	255	255	1020	1020
											1124	1	255	255	255	255	255
											1125	271	255	255	255	69105	69105
											1126	1	255	255	255	255	255
											1127	1	255	255	255	255	255
											1128	2	255	255	255	510	510
											1129	1	255	255	255	255	255
											1130	2	255	255	255	510	510
											1131	1	255	255	255	255	255
											1132	1	255	255	255	255	255
											1133	2	255	255	255	510	510
											1134	1	255	255	255	255	255
											1135	1	255	255	255	255	255
											1136	1	255	255	255	255	255
											1137	1	255	255	255	255	255
											1138	8	255	255	255	2040	2040
											1139	1	255	255	255	255	255
											1140	4	255	255	255	1020	1020
											1141	2	255	255	255	510	510
											1142	4	255	255	255	1020	1020
											1143	11	255	255	255	2805	2805
											1144	2	255	255	255	510	510
											1145	1	255	255	255	255	255
											1146	1	255	255	255	255	255
											1147	1	255	255	255	255	255
											1148	1	255	255	255	255	255
											1149	1	255	255	255	255	255
											1150	1	255	255	255	255	255
											1151	2	255	255	255	510	510
											1152	1	255	255	255	255	255
											1153	1	255	255	255	255	255
											1154	1	255	255	255	255	255
											1155	1	255	255	255	255	255
											1156	1	255	255	255	255	255
											1157	2	255	255	255	510	510
											1158	1	255	255	255	255	255
											1159	1	255	255	255	255	255
											1160	3	255	255	255	765	765
											1161	2	255	255	255	510	510
											1162	4	255	255	255	1020	1020
											1163	2	255	255	255	510	510
											1164	1	255	255	255	255	255
											1165	1	255	255	255	255	255
											1166	2	255	255	255	510	510
											1167	1	255	255	255	255	255
											1168	1	255	255	255	255	255
											1169	1	255	255	255	255	255
											1170	1	255	255	255	255	255
											1171	241	255	255	255	61455	61455
											1172	1	255	255	255	255	255
											1173	1	255	255	255	255	255
											1174	1	255	255	255	255	255
											1175	1	255	255	255	255	255
											1176	1	255	255	255	255	255
											1177	1	255	255	255	255	255
											1178	1	255	255	255	255	255
											1179	2	255	255	255	510	510
											1180	1	255	255	255	255	255
											1181	1	255	255	255	255	255
											1182	1	255	255	255	255	255
											1183	1	255	255	255	255	255
											1184	2	255	255	255	510	510
											1185	1	255	255	255	255	255
											1186	1	255	255	255	255	255
											1187	1	255	255	255	255	255
											1188	1	255	255	255	255	255
											1189	1	255	255	255	255	255
											1190	1	255	255	255	255	255
											1191	1	255	255	255	255	255
											1192	1	255	255	255	255	255
											1193	1	255	255	255	255	255
											1194	257	255	255	255	65535	65535
											1195	1	255	255	255	255	255
											1196	1	255	255	255	255	255
											1197	3	255	255	255	765	765
											1198	1	255	255	255	255	255
											1199	1	255	255	255	255	255
											1200	3	255	255	255	765	765
											1201	2	255	255	255	510	510
											1202	1	255	255	255	255	255
											1203	1	255	255	255	255	255
											1204	1	255	255	255	255	255
											1205	1	255	255	255	255	255
											1206	1	255	255	255	255	255
											1207	1	255	255	255	255	255
											1208	1	255	255	255	255	255
											1209	1	255	255	255	255	255
											1210	2	255	255	255	510	510
											1211	1	255	255	255	255	255
											1212	153	255	255	255	39015	39015
											1213	1	255	255	255	255	255
											1214	1	255	255	255	255	255
											1215	1	255	255	255	255	255
											1216	65	255	255	255	16575	16575
											1217	67	255	255	255	17085	17085
											1218	2	255	255	255	510	510
											1219	15	255	255	255	3825	3825
											1220	1	255	255	255	255	255
											1221	1	255	255	255	255	255
											1222	3	255	255	255	765	765
											1223	5	255	255	255	1275	1275
											1224	4	255	255	255	1020	1020
											1225	1	255	255	255	255	255
											1226	3	255	255	255	765	765
											1227	1	255	255	255	255	255
											1228	1	255	255	255	255	255
											1	2	255	255	255	510	510
											2	1	255	255	255	255	255
											3	1	255	255	255	255	255
											4	1	255	255	255	255	255
											5	2	255	255	255	510	510
											6	1	255	255	255	255	255
											7	1	255	255	255	255	255
											8	3	255	255	255	765	765
											9	648	255	255	255	165240	165240
											10	1	255	255	255	255	255
											11	1	255	255	255	255	255
											12	4	255	255	255	1020	1020
											13	16	255	255	255	4080	4080
											14	1	255	255	255	255	255
											15	1	255	255	255	255	255
											16	1	255	255	255	255	255
											17	3	255	255	255	765	765
											18	58	255	255	255	14790	14790
											19	3	255	255	255	765	765
											20	1	255	255	255	255	255
											21	1	255	255	255	255	255
											22	2	255	255	255	510	510
											23	1	255	255	255	255	255
											24	2	255	255	255	510	510
											25	1	255	255	255	255	255
											26	1	255	255	255	255	255
											27	1	255	255	255	255	255
											28	1	255	255	255	255	255
											29	1	255	255	255	255	255
											30	1	255	255	255	255	255
											31	2	255	255	255	510	510
											32	1	255	255	255	255	255
											33	1	255	255	255	255	255
											34	1	255	255	255	255	255
											35	2	255	255	255	510	510
											36	1	255	255	255	255	255
											37	1	255	255	255	255	255
											38	1	255	255	255	255	255
											39	3	255	255	255	765	765
											40	1	255	255	255	255	255
											41	1	255	255	255	255	255
											42	1	255	255	255	255	255
											43	1	255	255	255	255	255
											44	25	255	255	255	6375	6375
											45	1	255	255	255	255	255
											46	1	255	255	255	255	255
											47	1	255	255	255	255	255
											48	3	255	255	255	765	765
											49	1	255	255	255	255	255
											50	1	255	255	255	255	255
											51	1	255	255	255	255	255
											52	2	255	255	255	510	510
											53	1	255	255	255	255	255
											54	229	255	255	255	58395	58395
											55	1	255	255	255	255	255
											56	35	255	255	255	8925	8925
											57	1	255	255	255	255	255
											58	1	255	255	255	255	255
											59	2	255	255	255	510	510
											60	2	255	255	255	510	510
											61	1	255	255	255	255	255
											62	2	255	255	255	510	510
											63	1	255	255	255	255	255
											64	1	255	255	255	255	255
											65	1	255	255	255	255	255
											66	1	255	255	255	255	255
											67	1	255	255	255	255	255
											68	1	255	255	255	255	255
											69	2	255	255	255	510	510
											70	1	255	255	255	255	255
											71	1	255	255	255	255	255
											72	1	255	255	255	255	255
											73	1	255	255	255	255	255
											74	2	255	255	255	510	510
											75	1	255	255	255	255	255
											76	3	255	255	255	765	765
											77	2	255	255	255	510	510
											78	1	255	255	255	255	255
											79	1	255	255	255	255	255
											80	1	255	255	255	255	255
											81	1	255	255	255	255	255
											82	1	255	255	255	255	255
											83	1	255	255	255	255	255
											84	2	255	255	255	510	510
											85	1	255	255	255	255	255
											86	1	255	255	255	255	255
											87	1	255	255	255	255	255
											88	1	255	255	255	255	255
											89	5	255	255	255	1275	1275
											90	1	255	255	255	255	255
											91	1	255	255	255	255	255
											92	1	255	255	255	255	255
											93	6	255	255	255	1530	1530
											94	1	255	255	255	255	255
											95	1	255	255	255	255	255
											96	1	255	255	255	255	255
											97	1	255	255	255	255	255
											98	1	255	255	255	255	255
											99	106	255	255	255	27030	27030
											100	1	255	255	255	255	255
											101	1	255	255	255	255	255
											102	6	255	255	255	1530	1530
											103	1	255	255	255	255	255
											104	3	255	255	255	765	765
											105	2	255	255	255	510	510
											106	7	255	255	255	1785	1785
											107	1	255	255	255	255	255
											108	1	255	255	255	255	255
											109	11	255	255	255	2805	2805
											110	4	255	255	255	1020	1020
											111	1	255	255	255	255	255
											112	1	255	255	255	255	255
											113	2	255	255	255	510	510
											114	25	255	255	255	6375	6375
											115	1	255	255	255	255	255
											116	2	255	255	255	510	510
											117	4	255	255	255	1020	1020
											118	2	255	255	255	510	510
											119	1	255	255	255	255	255
											120	1	255	255	255	255	255
											121	2	255	255	255	510	510
											122	1	255	255	255	255	255
											123	1	255	255	255	255	255
											124	1	255	255	255	255	255
											125	2	255	255	255	510	510
											126	1	255	255	255	255	255
											127	1	255	255	255	255	255
											128	1	255	255	255	255	255
											129	2	255	255	255	510	510
											130	5	255	255	255	1275	1275
											131	1	255	255	255	255	255
											132	1	255	255	255	255	255
											133	1	255	255	255	255	255
											134	2	255	255	255	510	510
											135	2	255	255	255	510	510
											136	2	255	255	255	510	510
											137	165	255	255	255	42075	42075
											138	1	255	255	255	255	255
											139	1	255	255	255	255	255
											140	1	255	255	255	255	255
											141	1	255	255	255	255	255
											142	1	255	255	255	255	255
											143	1	255	255	255	255	255
											144	1	255	255	255	255	255
											145	2	255	255	255	510	510
											146	1	255	255	255	255	255
											147	3	255	255	255	765	765
											148	2	255	255	255	510	510
											149	1	255	255	255	255	255
											150	4	255	255	255	1020	1020
											151	1	255	255	255	255	255
											152	2	255	255	255	510	510
											153	1	255	255	255	255	255
											154	2	255	255	255	510	510
											155	1	255	255	255	255	255
											156	1	255	255	255	255	255
											157	3	255	255	255	765	765
											158	177	255	255	255	45135	45135
											159	1	255	255	255	255	255
											160	1	255	255	255	255	255
											161	2	255	255	255	510	510
											162	1	255	255	255	255	255
											163	1	255	255	255	255	255
											164	21	255	255	255	5355	5355
											165	3	255	255	255	765	765
											166	1	255	255	255	255	255
											167	1	255	255	255	255	255
											168	1	255	255	255	255	255
											169	1	255	255	255	255	255
											170	1	255	255	255	255	255
											171	1	255	255	255	255	255
											172	2	255	255	255	510	510
											173	1	255	255	255	255	255
											174	1	255	255	255	255	255
											175	11	255	255	255	2805	2805
											176	1	255	255	255	255	255
											177	2	255	255	255	510	510
											178	1	255	255	255	255	255
											179	1	255	255	255	255	255
											180	1	255	255	255	255	255
											181	1	255	255	255	255	255
											182	1	255	255	255	255	255
											183	1	255	255	255	255	255
											184	2	255	255	255	510	510
											185	1	255	255	255	255	255
											186	1	255	255	255	255	255
											187	1	255	255	255	255	255
											188	1	255	255	255	255	255
											189	1	255	255	255	255	255
											190	3	255	255	255	765	765
											191	1	255	255	255	255	255
											192	2258	255	255	255	575790	575790
											193	2	255	255	255	510	510
											194	1	255	255	255	255	255
											195	174	255	255	255	44370	44370
											196	2	255	255	255	510	510
											197	1	255	255	255	255	255
											198	18	255	255	255	4590	4590
											199	1	255	255	255	255	255
											200	1	255	255	255	255	255
											201	1	255	255	255	255	255
											202	1	255	255	255	255	255
											203	30	255	255	255	7650	7650
											204	13	255	255	255	3315	3315
											205	2	255	255	255	510	510
											206	12	255	255	255	3060	3060
											207	1	255	255	255	255	255
											208	1	255	255	255	255	255
											209	6	255	255	255	1530	1530
											210	1	255	255	255	255	255
											211	1	255	255	255	255	255
											212	2	255	255	255	510	510
											213	1	255	255	255	255	255
											214	1	255	255	255	255	255
											215	6	255	255	255	1530	1530
											216	1	255	255	255	255	255
											217	1	255	255	255	255	255
											218	1	255	255	255	255	255
											219	1	255	255	255	255	255
											220	1	255	255	255	255	255
											221	2	255	255	255	510	510
											222	1	255	255	255	255	255
											223	1	255	255	255	255	255
											224	1	255	255	255	255	255
											225	1	255	255	255	255	255
											226	2	255	255	255	510	510
											227	1	255	255	255	255	255
											228	1	255	255	255	255	255
											229	1	255	255	255	255	255
											230	2	255	255	255	510	510
											231	1	255	255	255	255	255
											232	1	255	255	255	255	255
											233	1	255	255	255	255	255
											234	27	255	255	255	6885	6885
											235	1	255	255	255	255	255
											236	1	255	255	255	255	255
											237	1	255	255	255	255	255
											238	1	255	255	255	255	255
											239	2	255	255	255	510	510
											240	1	255	255	255	255	255
											241	1	255	255	255	255	255
											242	2	255	255	255	510	510
											243	1	255	255	255	255	255
											244	1	255	255	255	255	255
											245	1	255	255	255	255	255
											246	2	255	255	255	510	510
											247	2	255	255	255	510	510
											248	1	255	255	255	255	255
											249	4	255	255	255	1020	1020
											250	8	255	255	255	2040	2040
											251	1	255	255	255	255	255
											252	1	255	255	255	255	255
											253	1	255	255	255	255	255
											254	1	255	255	255	255	255
											255	1	255	255	255	255	255
											256	1	255	255	255	255	255
											257	2	255	255	255	510	510
											258	1	255	255	255	255	255
											259	1	255	255	255	255	255
											260	1	255	255	255	255	255
											261	1	255	255	255	255	255
											262	1	255	255	255	255	255
											263	1	255	255	255	255	255
											264	3	255	255	255	765	765
											265	3	255	255	255	765	765
											266	2	255	255	255	510	510
											267	1	255	255	255	255	255
											268	4	255	255	255	1020	1020
											269	2	255	255	255	510	510
											270	1	255	255	255	255	255
											271	1	255	255	255	255	255
											272	1	255	255	255	255	255
											273	1	255	255	255	255	255
											274	1	255	255	255	255	255
											275	2	255	255	255	510	510
											276	1	255	255	255	255	255
											277	1	255	255	255	255	255
											278	4	255	255	255	1020	1020
											279	1	255	255	255	255	255
											280	1	255	255	255	255	255
											281	1	255	255	255	255	255
											282	1	255	255	255	255	255
											283	1	255	255	255	255	255
											284	1	255	255	255	255	255
											285	1	255	255	255	255	255
											286	4	255	255	255	1020	1020
											287	1	255	255	255	255	255
											288	1	255	255	255	255	255
											289	2	255	255	255	510	510
											290	2	255	255	255	510	510
											291	1	255	255	255	255	255
											292	2	255	255	255	510	510
											293	2	255	255	255	510	510
											294	3	255	255	255	765	765
											295	1	255	255	255	255	255
											296	1	255	255	255	255	255
											297	1	255	255	255	255	255
											298	1	255	255	255	255	255
											299	1	255	255	255	255	255
											300	1	255	255	255	255	255
											301	9	255	255	255	2295	2295
											302	3	255	255	255	765	765
											303	2	255	255	255	510	510
											304	1	255	255	255	255	255
											305	1	255	255	255	255	255
											306	1	255	255	255	255	255
											307	1	255	255	255	255	255
											308	3	255	255	255	765	765
											309	1	255	255	255	255	255
											310	1	255	255	255	255	255
											311	2	255	255	255	510	510
											312	1	255	255	255	255	255
											313	1	255	255	255	255	255
											314	1	255	255	255	255	255
											315	1	255	255	255	255	255
											316	1	255	255	255	255	255
											317	1	255	255	255	255	255
											318	1	255	255	255	255	255
											319	1	255	255	255	255	255
											320	1	255	255	255	255	255
											321	1	255	255	255	255	255
											322	3	255	255	255	765	765
											323	1	255	255	255	255	255
											324	1	255	255	255	255	255
											325	1	255	255	255	255	255
											326	1	255	255	255	255	255
											327	1	255	255	255	255	255
											328	1	255	255	255	255	255
											329	1	255	255	255	255	255
											330	1	255	255	255	255	255
											331	1	255	255	255	255	255
											332	595	255	255	255	151725	151725
											333	1	255	255	255	255	255
											334	3	255	255	255	765	765
											335	2	255	255	255	510	510
											336	1	255	255	255	255	255
											337	1	255	255	255	255	255
											338	1	255	255	255	255	255
											339	1	255	255	255	255	255
											340	1	255	255	255	255	255
											341	1	255	255	255	255	255
											342	1	255	255	255	255	255
											343	1	255	255	255	255	255
											344	1	255	255	255	255	255
											345	1	255	255	255	255	255
											346	1	255	255	255	255	255
											347	1	255	255	255	255	255
											348	2	255	255	255	510	510
											349	3	255	255	255	765	765
											350	1	255	255	255	255	255
											351	239	255	255	255	60945	60945
											352	3	255	255	255	765	765
											353	1	255	255	255	255	255
											354	1	255	255	255	255	255
											355	2	255	255	255	510	510
											356	1	255	255	255	255	255
											357	1	255	255	255	255	255
											358	1	255	255	255	255	255
											359	3	255	255	255	765	765
											360	1	255	255	255	255	255
											361	1	255	255	255	255	255
											362	1	255	255	255	255	255
											363	1	255	255	255	255	255
											364	1	255	255	255	255	255
											365	1	255	255	255	255	255
											366	1	255	255	255	255	255
											367	1	255	255	255	255	255
											368	1	255	255	255	255	255
											369	1	255	255	255	255	255
											370	1	255	255	255	255	255
											371	1	255	255	255	255	255
											372	2	255	255	255	510	510
											373	1	255	255	255	255	255
											374	1	255	255	255	255	255
											375	1	255	255	255	255	255
											376	7	255	255	255	1785	1785
											377	1	255	255	255	255	255
											378	1	255	255	255	255	255
											379	2	255	255	255	510	510
											380	1	255	255	255	255	255
											381	1	255	255	255	255	255
											382	1	255	255	255	255	255
											383	1	255	255	255	255	255
											384	1	255	255	255	255	255
											385	1	255	255	255	255	255
											386	2	255	255	255	510	510
											387	1	255	255	255	255	255
											388	5	255	255	255	1275	1275
											389	1	255	255	255	255	255
											390	1	255	255	255	255	255
											391	1	255	255	255	255	255
											392	1	255	255	255	255	255
											393	1	255	255	255	255	255
											394	1	255	255	255	255	255
											395	1	255	255	255	255	255
											396	1	255	255	255	255	255
											397	1	255	255	255	255	255
											398	1	255	255	255	255	255
											399	2	255	255	255	510	510
											400	1	255	255	255	255	255
											401	1	255	255	255	255	255
											402	1	255	255	255	255	255
											403	1	255	255	255	255	255
											404	1	255	255	255	255	255
											405	3	255	255	255	765	765
											406	1	255	255	255	255	255
											407	1	255	255	255	255	255
											408	1	255	255	255	255	255
											409	1	255	255	255	255	255
											410	1	255	255	255	255	255
											411	1	255	255	255	255	255
											412	1	255	255	255	255	255
											413	4	255	255	255	1020	1020
											414	1	255	255	255	255	255
											415	1	255	255	255	255	255
											416	1	255	255	255	255	255
											417	1	255	255	255	255	255
											418	1	255	255	255	255	255
											419	1	255	255	255	255	255
											420	1	255	255	255	255	255
											421	1	255	255	255	255	255
											422	1	255	255	255	255	255
											423	1	255	255	255	255	255
											424	1	255	255	255	255	255
											425	1	255	255	255	255	255
											426	1	255	255	255	255	255
											427	2	255	255	255	510	510
											428	1	255	255	255	255	255
											429	1	255	255	255	255	255
											430	1	255	255	255	255	255
											431	1	255	255	255	255	255
											432	2	255	255	255	510	510
											433	2	255	255	255	510	510
											434	1	255	255	255	255	255
											435	1	255	255	255	255	255
											436	1	255	255	255	255	255
											437	1	255	255	255	255	255
											438	1	255	255	255	255	255
											439	1	255	255	255	255	255
											440	4	255	255	255	1020	1020
											441	1	255	255	255	255	255
											442	1	255	255	255	255	255
											443	1	255	255	255	255	255
											444	1	255	255	255	255	255
											445	2	255	255	255	510	510
											446	1	255	255	255	255	255
											447	1	255	255	255	255	255
											448	1	255	255	255	255	255
											449	8	255	255	255	2040	2040
											450	5	255	255	255	1275	1275
											451	7	255	255	255	1785	1785
											452	2	255	255	255	510	510
											453	1	255	255	255	255	255
											454	1	255	255	255	255	255
											455	1	255	255	255	255	255
											456	1	255	255	255	255	255
											457	1	255	255	255	255	255
											458	1	255	255	255	255	255
											459	1	255	255	255	255	255
											460	1	255	255	255	255	255
											461	1	255	255	255	255	255
											462	2	255	255	255	510	510
											463	1	255	255	255	255	255
											464	1	255	255	255	255	255
											465	1	255	255	255	255	255
											466	1	255	255	255	255	255
											467	1	255	255	255	255	255
											468	1	255	255	255	255	255
											469	1	255	255	255	255	255
											470	1	255	255	255	255	255
											471	1	255	255	255	255	255
											472	1	255	255	255	255	255
											473	1	255	255	255	255	255
											474	159	255	255	255	40545	40545
											475	1	255	255	255	255	255
											476	1	255	255	255	255	255
											477	2	255	255	255	510	510
											478	5	255	255	255	1275	1275
											479	5	255	255	255	1275	1275
											480	1	255	255	255	255	255
											481	2	255	255	255	510	510
											482	205	255	255	255	52275	52275
											483	2	255	255	255	510	510
											484	2	255	255	255	510	510
											485	1	255	255	255	255	255
											486	1	255	255	255	255	255
											487	1	255	255	255	255	255
											488	2	255	255	255	510	510
											489	1	255	255	255	255	255
											490	2	255	255	255	510	510
											491	1	255	255	255	255	255
											492	3	255	255	255	765	765
											493	1	255	255	255	255	255
											494	1	255	255	255	255	255
											495	687	255	255	255	175185	175185
											496	1	255	255	255	255	255
											497	1	255	255	255	255	255
											498	1	255	255	255	255	255
											499	28	255	255	255	7140	7140
											500	1	255	255	255	255	255
											501	5	255	255	255	1275	1275
											502	1	255	255	255	255	255
											503	17	255	255	255	4335	4335
											504	3	255	255	255	765	765
											505	1	255	255	255	255	255
											506	1	255	255	255	255	255
											507	1	255	255	255	255	255
											508	1	255	255	255	255	255
											509	1	255	255	255	255	255
											510	3	255	255	255	765	765
											511	1	255	255	255	255	255
											512	2	255	255	255	510	510
											513	2	255	255	255	510	510
											514	1	255	255	255	255	255
											515	1	255	255	255	255	255
											516	2	255	255	255	510	510
											517	1	255	255	255	255	255
											518	1	255	255	255	255	255
											519	19	255	255	255	4845	4845
											520	6	255	255	255	1530	1530
											521	1	255	255	255	255	255
											522	1	255	255	255	255	255
											523	1	255	255	255	255	255
											524	3	255	255	255	765	765
											525	2	255	255	255	510	510
											526	7	255	255	255	1785	1785
											527	2	255	255	255	510	510
											528	2	255	255	255	510	510
											529	2	255	255	255	510	510
											530	1	255	255	255	255	255
											531	1	255	255	255	255	255
											532	1	255	255	255	255	255
											533	6	255	255	255	1530	1530
											534	1	255	255	255	255	255
											535	1	255	255	255	255	255
											536	4	255	255	255	1020	1020
											537	1	255	255	255	255	255
											538	1	255	255	255	255	255
											539	1	255	255	255	255	255
											540	2	255	255	255	510	510
											541	1	255	255	255	255	255
											542	1	255	255	255	255	255
											543	3	255	255	255	765	765
											544	1	255	255	255	255	255
											545	5	255	255	255	1275	1275
											546	1	255	255	255	255	255
											547	109	255	255	255	27795	27795
											548	1	255	255	255	255	255
											549	1	255	255	255	255	255
											550	1	255	255	255	255	255
											551	1	255	255	255	255	255
											552	1	255	255	255	255	255
											553	1	255	255	255	255	255
											554	1	255	255	255	255	255
											555	2	255	255	255	510	510
											556	2	255	255	255	510	510
											557	6	255	255	255	1530	1530
											558	1	255	255	255	255	255
											559	1	255	255	255	255	255
											560	2	255	255	255	510	510
											561	1	255	255	255	255	255
											562	1	255	255	255	255	255
											563	1	255	255	255	255	255
											564	2	255	255	255	510	510
											565	13	255	255	255	3315	3315
											566	5	255	255	255	1275	1275
											567	1	255	255	255	255	255
											568	1	255	255	255	255	255
											569	1	255	255	255	255	255
											570	1	255	255	255	255	255
											571	1	255	255	255	255	255
											572	198	255	255	255	50490	50490
											573	1	255	255	255	255	255
											574	1	255	255	255	255	255
											575	1	255	255	255	255	255
											576	33	255	255	255	8415	8415
											577	1	255	255	255	255	255
											578	1	255	255	255	255	255
											579	1	255	255	255	255	255
											580	2	255	255	255	510	510
											581	1	255	255	255	255	255
											582	2	255	255	255	510	510
											583	1	255	255	255	255	255
											584	1	255	255	255	255	255
											585	1	255	255	255	255	255
											586	1	255	255	255	255	255
											587	1	255	255	255	255	255
											588	1	255	255	255	255	255
											589	1	255	255	255	255	255
											590	1	255	255	255	255	255
											591	73	255	255	255	18615	18615
											592	1	255	255	255	255	255
											593	2	255	255	255	510	510
											594	156	255	255	255	39780	39780
											595	1	255	255	255	255	255
											596	1	255	255	255	255	255
											597	1	255	255	255	255	255
											598	1	255	255	255	255	255
											599	1	255	255	255	255	255
											600	1	255	255	255	255	255
											601	2	255	255	255	510	510
											602	2	255	255	255	510	510
											603	1	255	255	255	255	255
											604	4	255	255	255	1020	1020
											605	1	255	255	255	255	255
											606	2	255	255	255	510	510
											607	4	255	255	255	1020	1020
											608	1	255	255	255	255	255
											609	1	255	255	255	255	255
											610	1	255	255	255	255	255
											611	1	255	255	255	255	255
											612	1	255	255	255	255	255
											613	1	255	255	255	255	255
											614	1	255	255	255	255	255
											615	1	255	255	255	255	255
											616	2	255	255	255	510	510
											617	1	255	255	255	255	255
											618	1	255	255	255	255	255
											619	1	255	255	255	255	255
											620	1	255	255	255	255	255
											621	1	255	255	255	255	255
											622	1	255	255	255	255	255
											623	1	255	255	255	255	255
											624	1	255	255	255	255	255
											625	2	255	255	255	510	510
											626	1	255	255	255	255	255
											627	1	255	255	255	255	255
											628	7	255	255	255	1785	1785
											629	2	255	255	255	510	510
											630	1	255	255	255	255	255
											631	1	255	255	255	255	255
											632	1	255	255	255	255	255
											633	1	255	255	255	255	255
											634	1	255	255	255	255	255
											635	6	255	255	255	1530	1530
											636	1	255	255	255	255	255
											637	2	255	255	255	510	510
											638	1	255	255	255	255	255
											639	1	255	255	255	255	255
											640	1	255	255	255	255	255
											641	1	255	255	255	255	255
											642	1	255	255	255	255	255
											643	1	255	255	255	255	255
											644	1	255	255	255	255	255
											645	1	255	255	255	255	255
											646	1	255	255	255	255	255
											647	1	255	255	255	255	255
											648	2	255	255	255	510	510
											649	1	255	255	255	255	255
											650	1	255	255	255	255	255
											651	1	255	255	255	255	255
											652	2	255	255	255	510	510
											653	1	255	255	255	255	255
											654	1	255	255	255	255	255
											655	1	255	255	255	255	255
											656	1	255	255	255	255	255
											657	1	255	255	255	255	255
											658	2	255	255	255	510	510
											659	1	255	255	255	255	255
											660	1	255	255	255	255	255
											661	1	255	255	255	255	255
											662	1	255	255	255	255	255
											663	2	255	255	255	510	510
											664	2	255	255	255	510	510
											665	2	255	255	255	510	510
											666	1	255	255	255	255	255
											667	1	255	255	255	255	255
											668	1	255	255	255	255	255
											669	1	255	255	255	255	255
											670	2	255	255	255	510	510
											671	1	255	255	255	255	255
											672	1	255	255	255	255	255
											673	1	255	255	255	255	255
											674	1	255	255	255	255	255
											675	1	255	255	255	255	255
											676	1	255	255	255	255	255
											677	1	255	255	255	255	255
											678	2	255	255	255	510	510
											679	1	255	255	255	255	255
											680	1	255	255	255	255	255
											681	1	255	255	255	255	255
											682	2	255	255	255	510	510
											683	1	255	255	255	255	255
											684	1	255	255	255	255	255
											685	1	255	255	255	255	255
											686	1	255	255	255	255	255
											687	1	255	255	255	255	255
											688	3	255	255	255	765	765
											689	45	255	255	255	11475	11475
											690	1	255	255	255	255	255
											691	1	255	255	255	255	255
											692	1	255	255	255	255	255
											693	3	255	255	255	765	765
											694	7	255	255	255	1785	1785
											695	1	255	255	255	255	255
											696	1	255	255	255	255	255
											697	1	255	255	255	255	255
											698	1	255	255	255	255	255
											699	2	255	255	255	510	510
											700	1	255	255	255	255	255
											701	1	255	255	255	255	255
											702	1	255	255	255	255	255
											703	1	255	255	255	255	255
											704	1	255	255	255	255	255
											705	1	255	255	255	255	255
											706	4	255	255	255	1020	1020
											707	1	255	255	255	255	255
											708	2	255	255	255	510	510
											709	1	255	255	255	255	255
											710	2	255	255	255	510	510
											711	1	255	255	255	255	255
											712	3	255	255	255	765	765
											713	2	255	255	255	510	510
											714	1	255	255	255	255	255
											715	1	255	255	255	255	255
											716	1	255	255	255	255	255
											717	4	255	255	255	1020	1020
											718	1	255	255	255	255	255
											719	1	255	255	255	255	255
											720	1	255	255	255	255	255
											721	1	255	255	255	255	255
											722	1	255	255	255	255	255
											723	1	255	255	255	255	255
											724	1	255	255	255	255	255
											725	4	255	255	255	1020	1020
											726	1	255	255	255	255	255
											727	1	255	255	255	255	255
											728	1	255	255	255	255	255
											729	1	255	255	255	255	255
											730	1	255	255	255	255	255
											731	1	255	255	255	255	255
											732	1	255	255	255	255	255
											733	4	255	255	255	1020	1020
											734	1	255	255	255	255	255
											735	1	255	255	255	255	255
											736	1	255	255	255	255	255
											737	1	255	255	255	255	255
											738	1	255	255	255	255	255
											739	5	255	255	255	1275	1275
											740	1	255	255	255	255	255
											741	1	255	255	255	255	255
											742	1	255	255	255	255	255
											743	1	255	255	255	255	255
											744	2	255	255	255	510	510
											745	1	255	255	255	255	255
											746	1	255	255	255	255	255
											747	84	255	255	255	21420	21420
											748	1	255	255	255	255	255
											749	3	255	255	255	765	765
											750	1	255	255	255	255	255
											751	1	255	255	255	255	255
											752	1	255	255	255	255	255
											753	1	255	255	255	255	255
											754	1	255	255	255	255	255
											755	1	255	255	255	255	255
											756	1	255	255	255	255	255
											757	2	255	255	255	510	510
											758	1	255	255	255	255	255
											759	1	255	255	255	255	255
											760	1	255	255	255	255	255
											761	1	255	255	255	255	255
											762	2	255	255	255	510	510
											763	1	255	255	255	255	255
											764	13	255	255	255	3315	3315
											765	1	255	255	255	255	255
											766	3	255	255	255	765	765
											767	1	255	255	255	255	255
											768	92	255	255	255	23460	23460
											769	2	255	255	255	510	510
											770	1	255	255	255	255	255
[truncated: 2,637 more rows]

## Sheet: 31 - summary
BFP									TF-GFP
	Count	Total Area	Ave. Size	% Area	Mean	IntDen				Count	Total Area	Ave. Size	% Area	Mean	IntDen		TF normalised to BFP	%	Average
MAX_20211015_E35_TN_1_31.lif - Series002 - C=0	52	99032	1904.46	37.778	255	485638			MAX_20211015_E35_TN_1_31.lif - Series002 - C=1	1228	21496	17.505	8.2	255	4463.75		0.00919151	0.919151	1.01726
MAX_20211015_E35_TN_1_31.lif - Series004 - C=0	65	138719	2134.14	52.917	255	544205			MAX_20211015_E35_TN_1_31.lif - Series004 - C=1	2500	23669	9.468	9.029	255	2414.24		0.00443626	0.443626
MAX_20211015_E35_TN_1_31.lif - Series006 - C=0	62	124160	2002.58	47.363	255	510658			MAX_20211015_E35_TN_1_31.lif - Series006 - C=1	197	4847	24.604	1.849	255	6274.04		0.0122862	1.22862
MAX_20211015_E35_TN_1_31.lif - Series008 - C=0	56	110037	1964.95	41.976	255	501061			MAX_20211015_E35_TN_1_31.lif - Series008 - C=1	301	5779	19.199	2.205	255	4895.83		0.00977092	0.977092
MAX_20211015_E35_TN_1_31.lif - Series010 - C=0	49	115485	2356.84	44.054	255	600993			MAX_20211015_E35_TN_1_31.lif - Series010 - C=1	409	14631	35.773	5.581	255	9122.02		0.0151782	1.51782

## Sheet: 419
BFP										TF-GFP
Embryo		Area	Mean	Min	Max	IntDen	RawIntDen			Embryo		Area	Mean	Min	Max	IntDen	RawIntDen
	1	111993	255	255	255	28558215	28558215				1	197	255	255	255	50235	50235
	2	5	255	255	255	1275	1275				2	35	255	255	255	8925	8925
	3	39	255	255	255	9945	9945				3	2	255	255	255	510	510
	4	2	255	255	255	510	510				4	7	255	255	255	1785	1785
	5	2	255	255	255	510	510				5	2	255	255	255	510	510
	6	44	255	255	255	11220	11220				6	818	255	255	255	208590	208590
	7	2	255	255	255	510	510				7	6	255	255	255	1530	1530
	8	2	255	255	255	510	510				8	189	255	255	255	48195	48195
	9	2	255	255	255	510	510				9	52	255	255	255	13260	13260
	10	94	255	255	255	23970	23970				10	4	255	255	255	1020	1020
	11	2	255	255	255	510	510				11	2	255	255	255	510	510
	12	2	255	255	255	510	510				12	2	255	255	255	510	510
	13	2	255	255	255	510	510				13	2	255	255	255	510	510
	14	4	255	255	255	1020	1020				14	3	255	255	255	765	765
	15	3	255	255	255	765	765				15	2	255	255	255	510	510
	16	6	255	255	255	1530	1530				16	220	255	255	255	56100	56100
	17	3	255	255	255	765	765				17	104	255	255	255	26520	26520
	18	2	255	255	255	510	510				18	2	255	255	255	510	510
	19	2	255	255	255	510	510				19	2	255	255	255	510	510
	20	2	255	255	255	510	510				20	2	255	255	255	510	510
	21	48	255	255	255	12240	12240				21	115	255	255	255	29325	29325
	22	137	255	255	255	34935	34935				22	3	255	255	255	765	765
	23	4	255	255	255	1020	1020				23	20	255	255	255	5100	5100
	24	3	255	255	255	765	765				24	18	255	255	255	4590	4590
	25	2	255	255	255	510	510				25	3	255	255	255	765	765
	26	2	255	255	255	510	510				26	3	255	255	255	765	765
	27	2	255	255	255	510	510				27	2	255	255	255	510	510
	28	2	255	255	255	510	510				28	6	255	255	255	1530	1530
	29	2	255	255	255	510	510				29	2	255	255	255	510	510
	30	2	255	255	255	510	510				30	2	255	255	255	510	510
	31	3	255	255	255	765	765				31	131	255	255	255	33405	33405
	32	16	255	255	255	4080	4080				32	2	255	255	255	510	510
	33	61	255	255	255	15555	15555				33	10	255	255	255	2550	2550
	34	9	255	255	255	2295	2295				34	2	255	255	255	510	510
	35	352	255	255	255	89760	89760				35	5	255	255	255	1275	1275
	36	2	255	255	255	510	510				36	3	255	255	255	765	765
	37	3	255	255	255	765	765				37	126	255	255	255	32130	32130
	38	362	255	255	255	92310	92310				38	2	255	255	255	510	510
	39	2	255	255	255	510	510				39	2	255	255	255	510	510
	40	2	255	255	255	510	510				40	2	255	255	255	510	510
	41	6	255	255	255	1530	1530				41	16	255	255	255	4080	4080
	42	2	255	255	255	510	510				42	596	255	255	255	151980	151980
	43	2	255	255	255	510	510				43	6	255	255	255	1530	1530
	44	2	255	255	255	510	510				44	2	255	255	255	510	510
	45	6	255	255	255	1530	1530				45	3	255	255	255	765	765
	46	15	255	255	255	3825	3825				46	30	255	255	255	7650	7650
	47	4	255	255	255	1020	1020				47	5	255	255	255	1275	1275
	48	111	255	255	255	28305	28305				48	27	255	255	255	6885	6885
	49	2	255	255	255	510	510				49	44	255	255	255	11220	11220
	50	253	255	255	255	64515	64515				50	5	255	255	255	1275	1275
	51	3	255	255	255	765	765				51	29	255	255	255	7395	7395
	52	2	255	255	255	510	510				52	2	255	255	255	510	510
	53	3	255	255	255	765	765				53	18	255	255	255	4590	4590
	54	42	255	255	255	10710	10710				54	901	255	255	255	229755	229755
	55	3	255	255	255	765	765				55	49	255	255	255	12495	12495
	56	5	255	255	255	1275	1275				56	3	255	255	255	765	765
	57	172	255	255	255	43860	43860				57	4	255	255	255	1020	1020
	58	90	255	255	255	22950	22950				58	3	255	255	255	765	765
	59	2	255	255	255	510	510				59	2	255	255	255	510	510
	60	3	255	255	255	765	765				60	6	255	255	255	1530	1530
	61	5	255	255	255	1275	1275				61	3	255	255	255	765	765
	62	92	255	255	255	23460	23460				62	4	255	255	255	1020	1020
	63	2	255	255	255	510	510				63	10	255	255	255	2550	2550
	64	96	255	255	255	24480	24480				64	75	255	255	255	19125	19125
	65	2	255	255	255	510	510				65	96	255	255	255	24480	24480
	66	13	255	255	255	3315	3315				66	85	255	255	255	21675	21675
	67	10	255	255	255	2550	2550				67	3	255	255	255	765	765
	68	140	255	255	255	35700	35700				68	56	255	255	255	14280	14280
	69	2	255	255	255	510	510				69	498	255	255	255	126990	126990
	70	385	255	255	255	98175	98175				70	2	255	255	255	510	510
	71	6	255	255	255	1530	1530				71	11	255	255	255	2805	2805
	72	5	255	255	255	1275	1275				72	2	255	255	255	510	510
	73	33	255	255	255	8415	8415				73	2	255	255	255	510	510
	74	2	255	255	255	510	510				74	2	255	255	255	510	510
	75	2	255	255	255	510	510				75	21	255	255	255	5355	5355
	76	2	255	255	255	510	510				76	2	255	255	255	510	510
	77	105	255	255	255	26775	26775				77	2	255	255	255	510	510
	78	5	255	255	255	1275	1275				78	189	255	255	255	48195	48195
	79	2	255	255	255	510	510				79	21	255	255	255	5355	5355
	80	6	255	255	255	1530	1530				80	5	255	255	255	1275	1275
	81	2	255	255	255	510	510				81	86	255	255	255	21930	21930
	82	2	255	255	255	510	510				82	2	255	255	255	510	510
	83	570	255	255	255	145350	145350				83	9	255	255	255	2295	2295
	84	2	255	255	255	510	510				84	2	255	255	255	510	510
	85	2	255	255	255	510	510				85	2	255	255	255	510	510
	86	111	255	255	255	28305	28305				86	22	255	255	255	5610	5610
	87	2	255	255	255	510	510				87	5	255	255	255	1275	1275
	88	2	255	255	255	510	510				88	11	255	255	255	2805	2805
	89	3	255	255	255	765	765				89	3	255	255	255	765	765
	90	4	255	255	255	1020	1020				90	2	255	255	255	510	510
	91	2	255	255	255	510	510				91	4	255	255	255	1020	1020
	92	2	255	255	255	510	510				92	177	255	255	255	45135	45135
	93	522	255	255	255	133110	133110				93	4	255	255	255	1020	1020
	94	2	255	255	255	510	510				94	2	255	255	255	510	510
	95	288	255	255	255	73440	73440				95	57	255	255	255	14535	14535
	96	6	255	255	255	1530	1530				96	2	255	255	255	510	510
	97	4	255	255	255	1020	1020				97	2	255	255	255	510	510
	98	3	255	255	255	765	765				98	2	255	255	255	510	510
	99	2	255	255	255	510	510				99	100	255	255	255	25500	25500
	100	2	255	255	255	510	510				100	8	255	255	255	2040	2040
	101	13	255	255	255	3315	3315				101	6	255	255	255	1530	1530
	102	2	255	255	255	510	510				102	2	255	255	255	510	510
	103	3	255	255	255	765	765				103	2	255	255	255	510	510
	104	2	255	255	255	510	510				104	4	255	255	255	1020	1020
	105	3	255	255	255	765	765				105	3	255	255	255	765	765
	106	7	255	255	255	1785	1785				106	61	255	255	255	15555	15555
	107	2	255	255	255	510	510				107	2	255	255	255	510	510
	108	2	255	255	255	510	510				108	3	255	255	255	765	765
	109	97	255	255	255	24735	24735				109	3	255	255	255	765	765
	110	2	255	255	255	510	510				110	2	255	255	255	510	510
	111	89	255	255	255	22695	22695				111	70	255	255	255	17850	17850
	112	7	255	255	255	1785	1785				112	2	255	255	255	510	510
	113	2	255	255	255	510	510				113	4	255	255	255	1020	1020
	114	2	255	255	255	510	510				114	2	255	255	255	510	510
	115	46	255	255	255	11730	11730				115	623	255	255	255	158865	158865
	116	2	255	255	255	510	510				116	257	255	255	255	65535	65535
	117	2	255	255	255	510	510				117	103	255	255	255	26265	26265
	118	5	255	255	255	1275	1275				118	4	255	255	255	1020	1020
	119	43	255	255	255	10965	10965				119	444	255	255	255	113220	113220
	120	2	255	255	255	510	510				120	11	255	255	255	2805	2805
	1	61	255	255	255	15555	15555				121	2	255	255	255	510	510
	2	76378	255	255	255	19476390	19476390				122	211	255	255	255	53805	53805
	3	4	255	255	255	1020	1020				123	3	255	255	255	765	765
	4	26	255	255	255	6630	6630				124	2	255	255	255	510	510
	5	2	255	255	255	510	510				125	2	255	255	255	510	510
	6	2	255	255	255	510	510				126	9	255	255	255	2295	2295
	7	4	255	255	255	1020	1020				127	4	255	255	255	1020	1020
	8	43	255	255	255	10965	10965				128	2	255	255	255	510	510
	9	2	255	255	255	510	510				129	183	255	255	255	46665	46665
	10	5	255	255	255	1275	1275				130	2	255	255	255	510	510
	11	116	255	255	255	29580	29580				131	3	255	255	255	765	765
	12	14	255	255	255	3570	3570				132	177	255	255	255	45135	45135
	13	7	255	255	255	1785	1785				133	2	255	255	255	510	510
	14	3	255	255	255	765	765				134	2	255	255	255	510	510
	15	8	255	255	255	2040	2040				135	2	255	255	255	510	510
	16	6	255	255	255	1530	1530				136	2	255	255	255	510	510
	17	3	255	255	255	765	765				137	2	255	255	255	510	510
	18	3	255	255	255	765	765				138	5	255	255	255	1275	1275
	19	35	255	255	255	8925	8925				139	41	255	255	255	10455	10455
	20	5	255	255	255	1275	1275				140	3	255	255	255	765	765
	21	4	255	255	255	1020	1020				141	4	255	255	255	1020	1020
	22	9	255	255	255	2295	2295				142	8	255	255	255	2040	2040
	23	2	255	255	255	510	510				143	2	255	255	255	510	510
	24	8	255	255	255	2040	2040				144	24	255	255	255	6120	6120
	25	2	255	255	255	510	510				145	5	255	255	255	1275	1275
	26	5	255	255	255	1275	1275				146	659	255	255	255	168045	168045
	27	2	255	255	255	510	510				147	2	255	255	255	510	510
	28	2	255	255	255	510	510				148	136	255	255	255	34680	34680
	29	3	255	255	255	765	765				149	18	255	255	255	4590	4590
	30	7	255	255	255	1785	1785				150	2	255	255	255	510	510
	31	4	255	255	255	1020	1020				151	3	255	255	255	765	765
	32	8	255	255	255	2040	2040				152	46	255	255	255	11730	11730
	33	94	255	255	255	23970	23970				153	2	255	255	255	510	510
	34	5	255	255	255	1275	1275				154	2	255	255	255	510	510
	35	9	255	255	255	2295	2295				155	3	255	255	255	765	765
	36	4	255	255	255	1020	1020				156	2	255	255	255	510	510
	37	9	255	255	255	2295	2295				157	3	255	255	255	765	765
	38	2	255	255	255	510	510				158	2	255	255	255	510	510
	39	4	255	255	255	1020	1020				159	2	255	255	255	510	510
	40	4	255	255	255	1020	1020				160	2	255	255	255	510	510
	41	3	255	255	255	765	765				161	115	255	255	255	29325	29325
	42	3	255	255	255	765	765				162	2	255	255	255	510	510
	43	151	255	255	255	38505	38505				163	792	255	255	255	201960	201960
	44	2	255	255	255	510	510				164	2	255	255	255	510	510
	45	67	255	255	255	17085	17085				165	37	255	255	255	9435	9435
	46	4	255	255	255	1020	1020				166	2	255	255	255	510	510
	47	24	255	255	255	6120	6120				167	3	255	255	255	765	765
	48	243	255	255	255	61965	61965				168	2	255	255	255	510	510
	49	2	255	255	255	510	510				169	10	255	255	255	2550	2550
	50	34	255	255	255	8670	8670				170	2	255	255	255	510	510
	51	2	255	255	255	510	510				171	2	255	255	255	510	510
	52	3	255	255	255	765	765				172	2	255	255	255	510	510
	53	2	255	255	255	510	510				173	3	255	255	255	765	765
	54	482	255	255	255	122910	122910				174	2	255	255	255	510	510
	55	5	255	255	255	1275	1275				175	2	255	255	255	510	510
	56	3	255	255	255	765	765				176	71	255	255	255	18105	18105
	57	3	255	255	255	765	765				177	6	255	255	255	1530	1530
	58	39	255	255	255	9945	9945				178	80	255	255	255	20400	20400
	59	2	255	255	255	510	510				179	2	255	255	255	510	510
	60	5	255	255	255	1275	1275				180	2	255	255	255	510	510
	61	47	255	255	255	11985	11985				181	2	255	255	255	510	510
	62	44	255	255	255	11220	11220				182	323	255	255	255	82365	82365
	63	6	255	255	255	1530	1530				183	130	255	255	255	33150	33150
	64	3	255	255	255	765	765				184	5	255	255	255	1275	1275
	65	2	255	255	255	510	510				185	3	255	255	255	765	765
	66	2	255	255	255	510	510				186	4	255	255	255	1020	1020
	67	3	255	255	255	765	765				187	2	255	255	255	510	510
	68	4	255	255	255	1020	1020				188	14	255	255	255	3570	3570
	69	2	255	255	255	510	510				189	57	255	255	255	14535	14535
	70	2	255	255	255	510	510				190	8	255	255	255	2040	2040
	1	60	255	255	255	15300	15300				191	2	255	255	255	510	510
	2	5	255	255	255	1275	1275				192	2	255	255	255	510	510
	3	77113	255	255	255	19663815	19663815				193	2	255	255	255	510	510
	4	982	255	255	255	250410	250410				194	2	255	255	255	510	510
	5	3	255	255	255	765	765				195	115	255	255	255	29325	29325
	6	19	255	255	255	4845	4845				196	12	255	255	255	3060	3060
	7	332	255	255	255	84660	84660				197	2	255	255	255	510	510
	8	10	255	255	255	2550	2550				198	3	255	255	255	765	765
	9	2	255	255	255	510	510				199	4	255	255	255	1020	1020
	10	102	255	255	255	26010	26010				200	9	255	255	255	2295	2295
	11	3	255	255	255	765	765				201	19	255	255	255	4845	4845
	12	2	255	255	255	510	510				202	7	255	255	255	1785	1785
	13	2	255	255	255	510	510				203	370	255	255	255	94350	94350
	14	8	255	255	255	2040	2040				204	27	255	255	255	6885	6885
	15	2	255	255	255	510	510				205	53	255	255	255	13515	13515
	16	48	255	255	255	12240	12240				206	2	255	255	255	510	510
	17	112	255	255	255	28560	28560				207	59	255	255	255	15045	15045
	18	7	255	255	255	1785	1785				208	221	255	255	255	56355	56355
	19	5	255	255	255	1275	1275				209	7	255	255	255	1785	1785
	20	2	255	255	255	510	510				210	2	255	255	255	510	510
	21	141	255	255	255	35955	35955				211	2	255	255	255	510	510
	22	2	255	255	255	510	510				212	3	255	255	255	765	765
	23	2	255	255	255	510	510				213	42	255	255	255	10710	10710
	24	231	255	255	255	58905	58905				214	19	255	255	255	4845	4845
	25	2	255	255	255	510	510				215	10	255	255	255	2550	2550
	26	2	255	255	255	510	510				216	370	255	255	255	94350	94350
	27	73	255	255	255	18615	18615				217	12	255	255	255	3060	3060
	28	7	255	255	255	1785	1785				218	3	255	255	255	765	765
	29	4	255	255	255	1020	1020				219	16	255	255	255	4080	4080
	30	3	255	255	255	765	765				220	3	255	255	255	765	765
	31	51	255	255	255	13005	13005				221	3	255	255	255	765	765
	32	2	255	255	255	510	510				222	2	255	255	255	510	510
	33	18	255	255	255	4590	4590				223	25	255	255	255	6375	6375
	34	18	255	255	255	4590	4590				224	8	255	255	255	2040	2040
	35	2	255	255	255	510	510				225	3	255	255	255	765	765
	36	25	255	255	255	6375	6375				226	35	255	255	255	8925	8925
	37	98	255	255	255	24990	24990				227	222	255	255	255	56610	56610
	38	2	255	255	255	510	510				228	27	255	255	255	6885	6885
	39	3	255	255	255	765	765				229	4	255	255	255	1020	1020
	40	7	255	255	255	1785	1785				230	17	255	255	255	4335	4335
	41	2	255	255	255	510	510				231	7	255	255	255	1785	1785
	42	26	255	255	255	6630	6630				232	3	255	255	255	765	765
	43	68	255	255	255	17340	17340				233	51	255	255	255	13005	13005
	44	3	255	255	255	765	765				234	37	255	255	255	9435	9435
	45	2	255	255	255	510	510				235	38	255	255	255	9690	9690
	46	4	255	255	255	1020	1020				236	82	255	255	255	20910	20910
	47	203	255	255	255	51765	51765				237	2	255	255	255	510	510
	48	2	255	255	255	510	510				238	2	255	255	255	510	510
	49	31	255	255	255	7905	7905				239	2	255	255	255	510	510
	50	4	255	255	255	1020	1020				240	2	255	255	255	510	510
	51	6	255	255	255	1530	1530				241	3	255	255	255	765	765
	52	11	255	255	255	2805	2805				242	52	255	255	255	13260	13260
	53	2	255	255	255	510	510				243	3	255	255	255	765	765
	54	3	255	255	255	765	765				244	8	255	255	255	2040	2040
	55	2	255	255	255	510	510				245	118	255	255	255	30090	30090
	56	4	255	255	255	1020	1020				246	171	255	255	255	43605	43605
	57	3	255	255	255	765	765				247	212	255	255	255	54060	54060
	58	2	255	255	255	510	510				248	3	255	255	255	765	765
	59	230	255	255	255	58650	58650				249	3	255	255	255	765	765
	60	113	255	255	255	28815	28815				250	3	255	255	255	765	765
	61	201	255	255	255	51255	51255				251	4	255	255	255	1020	1020
	62	12	255	255	255	3060	3060				252	3	255	255	255	765	765
	63	5	255	255	255	1275	1275				253	41	255	255	255	10455	10455
	64	5	255	255	255	1275	1275				254	2	255	255	255	510	510
	65	3	255	255	255	765	765				255	51	255	255	255	13005	13005
	66	4	255	255	255	1020	1020				256	57	255	255	255	14535	14535
	67	8	255	255	255	2040	2040				257	59	255	255	255	15045	15045
	68	228	255	255	255	58140	58140				258	47	255	255	255	11985	11985
	69	5	255	255	255	1275	1275				259	93	255	255	255	23715	23715
	70	2	255	255	255	510	510				260	5	255	255	255	1275	1275
	71	131	255	255	255	33405	33405				261	4	255	255	255	1020	1020
	72	3	255	255	255	765	765				262	2	255	255	255	510	510
	73	5	255	255	255	1275	1275				263	2	255	255	255	510	510
	74	2	255	255	255	510	510				264	2	255	255	255	510	510
	75	469	255	255	255	119595	119595				265	2	255	255	255	510	510
	76	2	255	255	255	510	510				266	133	255	255	255	33915	33915
	77	2	255	255	255	510	510				267	4	255	255	255	1020	1020
	78	2	255	255	255	510	510				268	2	255	255	255	510	510
	79	2	255	255	255	510	510				269	2	255	255	255	510	510
	80	486	255	255	255	123930	123930				270	35	255	255	255	8925	8925
	81	365	255	255	255	93075	93075				271	12	255	255	255	3060	3060
	82	195	255	255	255	49725	49725				272	3	255	255	255	765	765
	83	83	255	255	255	21165	21165				273	5	255	255	255	1275	1275
	84	2	255	255	255	510	510				274	7	255	255	255	1785	1785
	85	3	255	255	255	765	765				275	3	255	255	255	765	765
	86	4	255	255	255	1020	1020				276	3	255	255	255	765	765
	87	2	255	255	255	510	510				277	9	255	255	255	2295	2295
	88	3	255	255	255	765	765				278	152	255	255	255	38760	38760
	89	2	255	255	255	510	510				279	2	255	255	255	510	510
	90	9	255	255	255	2295	2295				280	5	255	255	255	1275	1275
	91	14	255	255	255	3570	3570				281	2	255	255	255	510	510
	92	397	255	255	255	101235	101235				282	66	255	255	255	16830	16830
	93	3	255	255	255	765	765				283	2	255	255	255	510	510
	94	2	255	255	255	510	510				284	190	255	255	255	48450	48450
	95	5	255	255	255	1275	1275				285	341	255	255	255	86955	86955
	96	219	255	255	255	55845	55845				286	2	255	255	255	510	510
	97	2	255	255	255	510	510				287	4	255	255	255	1020	1020
	98	5	255	255	255	1275	1275				288	4	255	255	255	1020	1020
	99	133	255	255	255	33915	33915				289	19	255	255	255	4845	4845
	100	2	255	255	255	510	510				290	18	255	255	255	4590	4590
	101	4	255	255	255	1020	1020				291	2	255	255	255	510	510
	102	5	255	255	255	1275	1275				292	7	255	255	255	1785	1785
	103	21	255	255	255	5355	5355				293	140	255	255	255	35700	35700
	104	6	255	255	255	1530	1530				294	2	255	255	255	510	510
	105	2	255	255	255	510	510				295	3	255	255	255	765	765
	106	3	255	255	255	765	765				296	4	255	255	255	1020	1020
	107	12	255	255	255	3060	3060				297	3	255	255	255	765	765
	108	6	255	255	255	1530	1530				298	79	255	255	255	20145	20145
	109	201	255	255	255	51255	51255				299	56	255	255	255	14280	14280
	110	2	255	255	255	510	510				300	876	255	255	255	223380	223380
	111	8	255	255	255	2040	2040				301	2	255	255	255	510	510
	112	4	255	255	255	1020	1020				302	74	255	255	255	18870	18870
	113	2	255	255	255	510	510				303	2	255	255	255	510	510
	114	2	255	255	255	510	510				304	2	255	255	255	510	510
	115	16	255	255	255	4080	4080				305	8	255	255	255	2040	2040
	116	22	255	255	255	5610	5610				306	2	255	255	255	510	510
	117	2	255	255	255	510	510				307	35	255	255	255	8925	8925
	118	265	255	255	255	67575	67575				308	7	255	255	255	1785	1785
	119	2	255	255	255	510	510				309	2	255	255	255	510	510
	120	2	255	255	255	510	510				310	4	255	255	255	1020	1020
	121	6	255	255	255	1530	1530				311	2	255	255	255	510	510
	122	8	255	255	255	2040	2040				312	2	255	255	255	510	510
	123	3	255	255	255	765	765				313	19	255	255	255	4845	4845
	124	13	255	255	255	3315	3315				314	2	255	255	255	510	510
	125	4	255	255	255	1020	1020				315	60	255	255	255	15300	15300
	126	9	255	255	255	2295	2295				316	2	255	255	255	510	510
	127	2	255	255	255	510	510				317	200	255	255	255	51000	51000
	128	3	255	255	255	765	765				318	28	255	255	255	7140	7140
	129	3	255	255	255	765	765				319	484	255	255	255	123420	123420
	130	2	255	255	255	510	510				320	2	255	255	255	510	510
	131	111	255	255	255	28305	28305				321	13	255	255	255	3315	3315
	132	2	255	255	255	510	510				322	487	255	255	255	124185	124185
	133	4	255	255	255	1020	1020				323	5	255	255	255	1275	1275
	134	60	255	255	255	15300	15300				324	3	255	255	255	765	765
	135	28	255	255	255	7140	7140				325	3	255	255	255	765	765
	136	41	255	255	255	10455	10455				326	2	255	255	255	510	510
	137	2	255	255	255	510	510				327	52	255	255	255	13260	13260
	138	12	255	255	255	3060	3060				328	2	255	255	255	510	510
	139	6	255	255	255	1530	1530				329	260	255	255	255	66300	66300
	140	2	255	255	255	510	510				330	2	255	255	255	510	510
	141	7	255	255	255	1785	1785				331	3	255	255	255	765	765
	142	92	255	255	255	23460	23460				332	1118	255	255	255	285090	285090
	143	2	255	255	255	510	510				333	48	255	255	255	12240	12240
	144	3	255	255	255	765	765				334	2	255	255	255	510	510
	1	123476	255	255	255	31486380	31486380				335	193	255	255	255	49215	49215
	2	4	255	255	255	1020	1020				336	3	255	255	255	765	765
	3	13	255	255	255	3315	3315				337	56	255	255	255	14280	14280
	4	2	255	255	255	510	510				338	2	255	255	255	510	510
	5	2	255	255	255	510	510				339	51	255	255	255	13005	13005
	6	195	255	255	255	49725	49725				340	94	255	255	255	23970	23970
	7	12	255	255	255	3060	3060				341	2	255	255	255	510	510
	8	2	255	255	255	510	510				342	2	255	255	255	510	510
	9	2	255	255	255	510	510				343	93	255	255	255	23715	23715
	10	3	255	255	255	765	765				344	29	255	255	255	7395	7395
	11	18	255	255	255	4590	4590				345	2	255	255	255	510	510
	12	3	255	255	255	765	765				346	2	255	255	255	510	510
	13	137	255	255	255	34935	34935				347	160	255	255	255	40800	40800
	14	7	255	255	255	1785	1785				348	2	255	255	255	510	510
	15	2	255	255	255	510	510				349	2	255	255	255	510	510
	16	33	255	255	255	8415	8415				350	3	255	255	255	765	765
	17	2	255	255	255	510	510				351	6	255	255	255	1530	1530
	18	5	255	255	255	1275	1275				352	2	255	255	255	510	510
	19	2	255	255	255	510	510				353	88	255	255	255	22440	22440
	20	31	255	255	255	7905	7905				354	2	255	255	255	510	510
	21	88	255	255	255	22440	22440				355	3	255	255	255	765	765
	22	2	255	255	255	510	510				356	3	255	255	255	765	765
	23	4	255	255	255	1020	1020				357	2	255	255	255	510	510
	24	7	255	255	255	1785	1785				358	4	255	255	255	1020	1020
	25	3	255	255	255	765	765				359	179	255	255	255	45645	45645
	26	6	255	255	255	1530	1530				360	7	255	255	255	1785	1785
	27	2	255	255	255	510	510				361	2	255	255	255	510	510
	28	26	255	255	255	6630	6630				362	2	255	255	255	510	510
	29	3	255	255	255	765	765				363	54	255	255	255	13770	13770
	30	2	255	255	255	510	510				364	91	255	255	255	23205	23205
	31	188	255	255	255	47940	47940				365	2	255	255	255	510	510
	32	2	255	255	255	510	510				366	2	255	255	255	510	510
	33	10	255	255	255	2550	2550				367	86	255	255	255	21930	21930
	34	12	255	255	255	3060	3060				368	308	255	255	255	78540	78540
	35	4	255	255	255	1020	1020				369	132	255	255	255	33660	33660
	36	14	255	255	255	3570	3570				370	34	255	255	255	8670	8670
	37	2	255	255	255	510	510				371	2	255	255	255	510	510
	38	915	255	255	255	233325	233325				372	2	255	255	255	510	510
	39	2	255	255	255	510	510				373	176	255	255	255	44880	44880
	40	71	255	255	255	18105	18105				374	2	255	255	255	510	510
	41	7	255	255	255	1785	1785				375	15	255	255	255	3825	3825
	42	5	255	255	255	1275	1275				376	3	255	255	255	765	765
	43	4	255	255	255	1020	1020				377	3	255	255	255	765	765
	44	124	255	255	255	31620	31620				378	23	255	255	255	5865	5865
	45	2	255	255	255	510	510				379	63	255	255	255	16065	16065
	46	126	255	255	255	32130	32130				380	5	255	255	255	1275	1275
	47	9	255	255	255	2295	2295				381	4	255	255	255	1020	1020
	48	42	255	255	255	10710	10710				382	16	255	255	255	4080	4080
	49	103	255	255	255	26265	26265				383	2	255	255	255	510	510
	50	245	255	255	255	62475	62475				384	1001	255	255	255	255255	255255
	51	3	255	255	255	765	765				385	3	255	255	255	765	765
	52	18	255	255	255	4590	4590				386	2	255	255	255	510	510
	53	91	255	255	255	23205	23205				387	19	255	255	255	4845	4845
	54	6	255	255	255	1530	1530				388	140	255	255	255	35700	35700
	55	91	255	255	255	23205	23205				389	151	255	255	255	38505	38505
	56	2	255	255	255	510	510				390	117	255	255	255	29835	29835
	57	17	255	255	255	4335	4335				391	3	255	255	255	765	765
	58	2	255	255	255	510	510				392	3	255	255	255	765	765
	59	4	255	255	255	1020	1020				393	2	255	255	255	510	510
	60	2	255	255	255	510	510				394	2	255	255	255	510	510
	61	7	255	255	255	1785	1785				395	2	255	255	255	510	510
	62	2	255	255	255	510	510				396	2	255	255	255	510	510
	63	2	255	255	255	510	510				397	42	255	255	255	10710	10710
	64	16	255	255	255	4080	4080				398	3	255	255	255	765	765
	65	14	255	255	255	3570	3570				399	4	255	255	255	1020	1020
	66	2	255	255	255	510	510				400	3	255	255	255	765	765
	67	3	255	255	255	765	765				401	13	255	255	255	3315	3315
	68	5	255	255	255	1275	1275				402	2	255	255	255	510	510
	69	2	255	255	255	510	510				403	2	255	255	255	510	510
	70	5	255	255	255	1275	1275				404	3	255	255	255	765	765
	71	5	255	255	255	1275	1275				405	2	255	255	255	510	510
	72	526	255	255	255	134130	134130				406	1100	255	255	255	280500	280500
	73	2	255	255	255	510	510				407	2	255	255	255	510	510
	74	2	255	255	255	510	510				408	11	255	255	255	2805	2805
	75	6	255	255	255	1530	1530				409	2	255	255	255	510	510
	76	2	255	255	255	510	510				410	23	255	255	255	5865	5865
	77	10	255	255	255	2550	2550				411	3	255	255	255	765	765
	78	7	255	255	255	1785	1785				412	5	255	255	255	1275	1275
	79	2	255	255	255	510	510				413	3	255	255	255	765	765
	80	43	255	255	255	10965	10965				414	5	255	255	255	1275	1275
	81	3	255	255	255	765	765				415	4	255	255	255	1020	1020
	82	3	255	255	255	765	765				416	2	255	255	255	510	510
	83	2	255	255	255	510	510				417	2	255	255	255	510	510
	84	4	255	255	255	1020	1020				418	2	255	255	255	510	510
	85	2	255	255	255	510	510				419	2	255	255	255	510	510
	86	3	255	255	255	765	765				420	3	255	255	255	765	765
	87	37	255	255	255	9435	9435				421	7	255	255	255	1785	1785
	88	37	255	255	255	9435	9435				422	14	255	255	255	3570	3570
	89	2	255	255	255	510	510				423	3	255	255	255	765	765
	90	580	255	255	255	147900	147900				424	2	255	255	255	510	510
	91	83	255	255	255	21165	21165				425	78	255	255	255	19890	19890
	92	101	255	255	255	25755	25755				426	2	255	255	255	510	510
	93	3	255	255	255	765	765				427	3	255	255	255	765	765
	94	7	255	255	255	1785	1785				1	17	255	255	255	4335	4335
	95	4	255	255	255	1020	1020				2	5597	255	255	255	1427235	1427235
	96	3	255	255	255	765	765				3	35	255	255	255	8925	8925
	97	319	255	255	255	81345	81345				4	2	255	255	255	510	510
	98	2	255	255	255	510	510				5	33	255	255	255	8415	8415
	99	2	255	255	255	510	510				6	2	255	255	255	510	510
	100	7	255	255	255	1785	1785				7	89	255	255	255	22695	22695
	101	2	255	255	255	510	510				8	2	255	255	255	510	510
	102	18	255	255	255	4590	4590				9	68	255	255	255	17340	17340
	103	173	255	255	255	44115	44115				10	7	255	255	255	1785	1785
	104	2	255	255	255	510	510				11	2	255	255	255	510	510
	105	2	255	255	255	510	510				12	2	255	255	255	510	510
	106	2	255	255	255	510	510				13	2	255	255	255	510	510
	107	495	255	255	255	126225	126225				14	2	255	255	255	510	510
	108	105	255	255	255	26775	26775				15	2	255	255	255	510	510
	109	2	255	255	255	510	510				16	2	255	255	255	510	510
	110	5	255	255	255	1275	1275				17	5	255	255	255	1275	1275
	111	11	255	255	255	2805	2805				18	2	255	255	255	510	510
	112	143	255	255	255	36465	36465				19	3	255	255	255	765	765
	113	11	255	255	255	2805	2805				20	13	255	255	255	3315	3315
	114	92	255	255	255	23460	23460				21	2	255	255	255	510	510
	115	2	255	255	255	510	510				22	7	255	255	255	1785	1785
	116	2	255	255	255	510	510				23	3	255	255	255	765	765
	117	279	255	255	255	71145	71145				24	12	255	255	255	3060	3060
	118	8	255	255	255	2040	2040				25	2	255	255	255	510	510
	119	4	255	255	255	1020	1020				26	2	255	255	255	510	510
	120	2	255	255	255	510	510				27	2	255	255	255	510	510
	121	6	255	255	255	1530	1530				28	3	255	255	255	765	765
	122	12	255	255	255	3060	3060				29	2	255	255	255	510	510
	123	240	255	255	255	61200	61200				30	2	255	255	255	510	510
	124	2	255	255	255	510	510				31	2	255	255	255	510	510
	125	2	255	255	255	510	510				32	3	255	255	255	765	765
	126	14	255	255	255	3570	3570				33	122	255	255	255	31110	31110
	127	3	255	255	255	765	765				34	2	255	255	255	510	510
	128	2	255	255	255	510	510				35	2	255	255	255	510	510
	129	3	255	255	255	765	765				36	3	255	255	255	765	765
	130	25	255	255	255	6375	6375				37	28	255	255	255	7140	7140
	131	3	255	255	255	765	765				38	22	255	255	255	5610	5610
	132	69	255	255	255	17595	17595				39	19	255	255	255	4845	4845
	133	23	255	255	255	5865	5865				40	3	255	255	255	765	765
	134	41	255	255	255	10455	10455				41	1428	255	255	255	364140	364140
	135	11	255	255	255	2805	2805				42	5	255	255	255	1275	1275
	136	22	255	255	255	5610	5610				43	2	255	255	255	510	510
	137	2	255	255	255	510	510				44	2	255	255	255	510	510
	1	145	255	255	255	36975	36975				45	2	255	255	255	510	510
	2	1125	255	255	255	286875	286875				46	44	255	255	255	11220	11220
	3	127035	255	255	255	32393925	32393925				47	6	255	255	255	1530	1530
	4	148	255	255	255	37740	37740				48	5	255	255	255	1275	1275
	5	75	255	255	255	19125	19125				49	2	255	255	255	510	510
	6	307	255	255	255	78285	78285				50	12	255	255	255	3060	3060
	7	416	255	255	255	106080	106080				51	11	255	255	255	2805	2805
	8	3	255	255	255	765	765				52	13	255	255	255	3315	3315
	9	321	255	255	255	81855	81855				53	2	255	255	255	510	510
	10	3	255	255	255	765	765				54	36	255	255	255	9180	9180
	11	3	255	255	255	765	765				55	28	255	255	255	7140	7140
	12	3	255	255	255	765	765				56	3	255	255	255	765	765
	13	17	255	255	255	4335	4335				57	8	255	255	255	2040	2040
	14	2	255	255	255	510	510				58	22	255	255	255	5610	5610
	15	2	255	255	255	510	510				59	29	255	255	255	7395	7395
	16	3	255	255	255	765	765				60	2	255	255	255	510	510
	17	374	255	255	255	95370	95370				61	492	255	255	255	125460	125460
	18	3	255	255	255	765	765				62	15	255	255	255	3825	3825
	19	145	255	255	255	36975	36975				63	2	255	255	255	510	510
	20	5	255	255	255	1275	1275				64	19	255	255	255	4845	4845
	21	145	255	255	255	36975	36975				65	5	255	255	255	1275	1275
	22	246	255	255	255	62730	62730				66	13	255	255	255	3315	3315
	23	41	255	255	255	10455	10455				67	2	255	255	255	510	510
	24	2	255	255	255	510	510				68	72	255	255	255	18360	18360
	25	2	255	255	255	510	510				69	2	255	255	255	510	510
	26	6	255	255	255	1530	1530				70	1540	255	255	255	392700	392700
	27	2	255	255	255	510	510				71	6	255	255	255	1530	1530
	28	383	255	255	255	97665	97665				72	6	255	255	255	1530	1530
	29	109	255	255	255	27795	27795				73	2	255	255	255	510	510
	30	2	255	255	255	510	510				74	2	255	255	255	510	510
	31	22	255	255	255	5610	5610				75	4	255	255	255	1020	1020
	32	2	255	255	255	510	510				76	24	255	255	255	6120	6120
	33	3	255	255	255	765	765				77	79	255	255	255	20145	20145
	34	2	255	255	255	510	510				78	5	255	255	255	1275	1275
	35	21	255	255	255	5355	5355				79	218	255	255	255	55590	55590
	36	3	255	255	255	765	765				80	2	255	255	255	510	510
	37	996	255	255	255	253980	253980				81	3	255	255	255	765	765
	38	3	255	255	255	765	765				82	13	255	255	255	3315	3315
	39	2	255	255	255	510	510				83	13	255	255	255	3315	3315
	40	5	255	255	255	1275	1275				84	47	255	255	255	11985	11985
	41	2	255	255	255	510	510				85	47	255	255	255	11985	11985
	42	2	255	255	255	510	510				86	4	255	255	255	1020	1020
	43	2	255	255	255	510	510				87	3139	255	255	255	800445	800445
	44	19	255	255	255	4845	4845				88	32	255	255	255	8160	8160
	45	2	255	255	255	510	510				89	7	255	255	255	1785	1785
	46	2	255	255	255	510	510				90	28	255	255	255	7140	7140
	47	6	255	255	255	1530	1530				91	3	255	255	255	765	765
	48	4	255	255	255	1020	1020				92	2	255	255	255	510	510
	49	3	255	255	255	765	765				93	2	255	255	255	510	510
	50	20	255	255	255	5100	5100				94	12	255	255	255	3060	3060
	51	3	255	255	255	765	765				95	252	255	255	255	64260	64260
	52	13	255	255	255	3315	3315				96	15	255	255	255	3825	3825
	53	48	255	255	255	12240	12240				97	32	255	255	255	8160	8160
	54	28	255	255	255	7140	7140				98	211	255	255	255	53805	53805
	55	56	255	255	255	14280	14280				99	2	255	255	255	510	510
	56	41	255	255	255	10455	10455				100	2	255	255	255	510	510
	57	516	255	255	255	131580	131580				101	2	255	255	255	510	510
	58	138	255	255	255	35190	35190				102	15	255	255	255	3825	3825
	59	7	255	255	255	1785	1785				103	3	255	255	255	765	765
	60	278	255	255	255	70890	70890				104	47	255	255	255	11985	11985
	61	5	255	255	255	1275	1275				105	2	255	255	255	510	510
	62	29	255	255	255	7395	7395				106	2	255	255	255	510	510
	63	3	255	255	255	765	765				107	3	255	255	255	765	765
	64	12	255	255	255	3060	3060				108	18	255	255	255	4590	4590
	65	2	255	255	255	510	510				109	13	255	255	255	3315	3315
	66	2	255	255	255	510	510				110	8	255	255	255	2040	2040
	67	230	255	255	255	58650	58650				111	8	255	255	255	2040	2040
	68	7	255	255	255	1785	1785				112	8	255	255	255	2040	2040
	69	3	255	255	255	765	765				113	154	255	255	255	39270	39270
	70	3	255	255	255	765	765				114	88	255	255	255	22440	22440
	71	7	255	255	255	1785	1785				115	7	255	255	255	1785	1785
	72	2	255	255	255	510	510				116	4	255	255	255	1020	1020
	73	16	255	255	255	4080	4080				117	91	255	255	255	23205	23205
	74	5	255	255	255	1275	1275				118	3	255	255	255	765	765
	75	13	255	255	255	3315	3315				119	69	255	255	255	17595	17595
	76	8	255	255	255	2040	2040				120	5	255	255	255	1275	1275
	77	207	255	255	255	52785	52785				121	24	255	255	255	6120	6120
	78	2	255	255	255	510	510				122	7	255	255	255	1785	1785
	79	4	255	255	255	1020	1020				123	6174	255	255	255	1574370	1574370
	80	2	255	255	255	510	510				124	8	255	255	255	2040	2040
	81	7	255	255	255	1785	1785				125	13	255	255	255	3315	3315
	82	107	255	255	255	27285	27285				126	3	255	255	255	765	765
	83	2	255	255	255	510	510				127	13	255	255	255	3315	3315
	84	9	255	255	255	2295	2295				128	3	255	255	255	765	765
	85	152	255	255	255	38760	38760				129	4	255	255	255	1020	1020
	86	5	255	255	255	1275	1275				130	2	255	255	255	510	510
	87	7	255	255	255	1785	1785				131	2	255	255	255	510	510
	88	19	255	255	255	4845	4845				132	2	255	255	255	510	510
	89	6	255	255	255	1530	1530				133	6	255	255	255	1530	1530
	90	3	255	255	255	765	765				134	16	255	255	255	4080	4080
	91	3	255	255	255	765	765				135	57	255	255	255	14535	14535
	92	59	255	255	255	15045	15045				136	2	255	255	255	510	510
	93	341	255	255	255	86955	86955				137	3	255	255	255	765	765
	94	180	255	255	255	45900	45900				138	31	255	255	255	7905	7905
	95	4	255	255	255	1020	1020				139	56	255	255	255	14280	14280
	96	8	255	255	255	2040	2040				140	3	255	255	255	765	765
	97	782	255	255	255	199410	199410				141	2	255	255	255	510	510
	98	6	255	255	255	1530	1530				142	2	255	255	255	510	510
	99	189	255	255	255	48195	48195				143	108	255	255	255	27540	27540
	100	6	255	255	255	1530	1530				144	15	255	255	255	3825	3825
	101	3	255	255	255	765	765				145	8	255	255	255	2040	2040
	102	2	255	255	255	510	510				146	127	255	255	255	32385	32385
	103	2	255	255	255	510	510				147	5	255	255	255	1275	1275
	104	2	255	255	255	510	510				148	67	255	255	255	17085	17085
	105	85	255	255	255	21675	21675				149	44	255	255	255	11220	11220
	106	4	255	255	255	1020	1020				150	2	255	255	255	510	510
	107	2	255	255	255	510	510				151	2	255	255	255	510	510
	108	3	255	255	255	765	765				152	246	255	255	255	62730	62730
	109	86	255	255	255	21930	21930				153	4	255	255	255	1020	1020
	110	2	255	255	255	510	510				154	4	255	255	255	1020	1020
	111	3	255	255	255	765	765				155	869	255	255	255	221595	221595
	1	354	255	255	255	90270	90270				156	9	255	255	255	2295	2295
	2	59193	255	255	255	15094215	15094215				157	3	255	255	255	765	765
	3	2	255	255	255	510	510				158	3	255	255	255	765	765
	4	2	255	255	255	510	510				159	3	255	255	255	765	765
	5	2	255	255	255	510	510				160	5	255	255	255	1275	1275
	6	155	255	255	255	39525	39525				161	2	255	255	255	510	510
	7	5	255	255	255	1275	1275				162	2	255	255	255	510	510
	8	629	255	255	255	160395	160395				163	2	255	255	255	510	510
	9	114	255	255	255	29070	29070				164	2	255	255	255	510	510
	10	13	255	255	255	3315	3315				165	12	255	255	255	3060	3060
	11	2	255	255	255	510	510				166	3	255	255	255	765	765
	12	289	255	255	255	73695	73695				167	5	255	255	255	1275	1275
	13	2	255	255	255	510	510				168	2	255	255	255	510	510
	14	5	255	255	255	1275	1275				169	12	255	255	255	3060	3060
	15	52	255	255	255	13260	13260				170	4	255	255	255	1020	1020
	16	2	255	255	255	510	510				171	479	255	255	255	122145	122145
	17	2	255	255	255	510	510				172	2	255	255	255	510	510
	18	72	255	255	255	18360	18360				173	4	255	255	255	1020	1020
	19	13	255	255	255	3315	3315				174	6	255	255	255	1530	1530
	20	2	255	255	255	510	510				175	207	255	255	255	52785	52785
	21	5	255	255	255	1275	1275				176	2	255	255	255	510	510
	22	14	255	255	255	3570	3570				177	18	255	255	255	4590	4590
	23	3	255	255	255	765	765				178	2	255	255	255	510	510
	24	4	255	255	255	1020	1020				179	2	255	255	255	510	510
	25	2	255	255	255	510	510				180	77	255	255	255	19635	19635
	26	150	255	255	255	38250	38250				181	11	255	255	255	2805	2805
	27	65	255	255	255	16575	16575				182	16	255	255	255	4080	4080
	28	2	255	255	255	510	510				183	11	255	255	255	2805	2805
	29	154	255	255	255	39270	39270				184	5217	255	255	255	1330335	1330335
	30	144	255	255	255	36720	36720				185	16	255	255	255	4080	4080
	31	2	255	255	255	510	510				186	7	255	255	255	1785	1785
	32	2	255	255	255	510	510				187	60	255	255	255	15300	15300
	33	112	255	255	255	28560	28560				188	37	255	255	255	9435	9435
	34	2	255	255	255	510	510				189	11	255	255	255	2805	2805
	35	4	255	255	255	1020	1020				190	2	255	255	255	510	510
	36	66	255	255	255	16830	16830				191	2	255	255	255	510	510
	37	145	255	255	255	36975	36975				192	22	255	255	255	5610	5610
	38	2	255	255	255	510	510				193	170	255	255	255	43350	43350
	39	10	255	255	255	2550	2550				194	12	255	255	255	3060	3060
	40	3	255	255	255	765	765				195	2	255	255	255	510	510
	41	7	255	255	255	1785	1785				196	148	255	255	255	37740	37740
	42	14	255	255	255	3570	3570				197	21	255	255	255	5355	5355
	43	4	255	255	255	1020	1020				198	42	255	255	255	10710	10710
	44	2	255	255	255	510	510				199	2	255	255	255	510	510
	45	46	255	255	255	11730	11730				200	73	255	255	255	18615	18615
	46	93	255	255	255	23715	23715				201	2	255	255	255	510	510
	47	18	255	255	255	4590	4590				202	3	255	255	255	765	765
	48	2	255	255	255	510	510				203	2	255	255	255	510	510
	49	125	255	255	255	31875	31875				204	2	255	255	255	510	510
	50	2	255	255	255	510	510				205	2	255	255	255	510	510
	51	2	255	255	255	510	510				206	4	255	255	255	1020	1020
	52	19	255	255	255	4845	4845				207	4	255	255	255	1020	1020
	53	2	255	255	255	510	510				208	2	255	255	255	510	510
	54	143	255	255	255	36465	36465				209	2	255	255	255	510	510
	55	36	255	255	255	9180	9180				210	2	255	255	255	510	510
	56	93	255	255	255	23715	23715				211	5	255	255	255	1275	1275
	57	3	255	255	255	765	765				212	2	255	255	255	510	510
	58	2	255	255	255	510	510				213	25	255	255	255	6375	6375
	59	4	255	255	255	1020	1020				214	8	255	255	255	2040	2040
	60	95	255	255	255	24225	24225				215	2	255	255	255	510	510
	61	93	255	255	255	23715	23715				216	26	255	255	255	6630	6630
	62	2	255	255	255	510	510				217	2	255	255	255	510	510
	63	2	255	255	255	510	510				218	6	255	255	255	1530	1530
	64	2	255	255	255	510	510				219	2	255	255	255	510	510
	65	2	255	255	255	510	510				220	4	255	255	255	1020	1020
	66	4	255	255	255	1020	1020				221	2	255	255	255	510	510
	67	138	255	255	255	35190	35190				222	25	255	255	255	6375	6375
	68	296	255	255	255	75480	75480				223	2	255	255	255	510	510
	69	98	255	255	255	24990	24990				224	22	255	255	255	5610	5610
	70	5	255	255	255	1275	1275				225	124	255	255	255	31620	31620
	71	193	255	255	255	49215	49215				226	4	255	255	255	1020	1020
	72	2	255	255	255	510	510				227	4	255	255	255	1020	1020
	73	5	255	255	255	1275	1275				228	45	255	255	255	11475	11475
	74	57	255	255	255	14535	14535				229	2	255	255	255	510	510
	75	2	255	255	255	510	510				230	2	255	255	255	510	510
	76	4	255	255	255	1020	1020				231	6	255	255	255	1530	1530
	77	2	255	255	255	510	510				232	7	255	255	255	1785	1785
	78	35	255	255	255	8925	8925				233	14	255	255	255	3570	3570
	79	10	255	255	255	2550	2550				234	2	255	255	255	510	510
	80	183	255	255	255	46665	46665				235	2	255	255	255	510	510
	81	21	255	255	255	5355	5355				236	87	255	255	255	22185	22185
	82	115	255	255	255	29325	29325				237	5	255	255	255	1275	1275
	83	4	255	255	255	1020	1020				238	2	255	255	255	510	510
	84	4	255	255	255	1020	1020				239	2	255	255	255	510	510
	85	202	255	255	255	51510	51510				240	5	255	255	255	1275	1275
	86	221	255	255	255	56355	56355				241	3	255	255	255	765	765
	87	8	255	255	255	2040	2040				242	3	255	255	255	765	765
	88	68	255	255	255	17340	17340				243	195	255	255	255	49725	49725
	89	172	255	255	255	43860	43860				244	2	255	255	255	510	510
	90	10	255	255	255	2550	2550				245	10	255	255	255	2550	2550
	91	14	255	255	255	3570	3570				246	1023	255	255	255	260865	260865
	92	2	255	255	255	510	510				247	2	255	255	255	510	510
	93	2	255	255	255	510	510				248	3	255	255	255	765	765
	94	6	255	255	255	1530	1530				249	15	255	255	255	3825	3825
	95	4	255	255	255	1020	1020				250	2	255	255	255	510	510
	96	144	255	255	255	36720	36720				251	41	255	255	255	10455	10455
	97	4	255	255	255	1020	1020				252	3	255	255	255	765	765
	98	3	255	255	255	765	765				253	17	255	255	255	4335	4335
	99	22	255	255	255	5610	5610				254	14	255	255	255	3570	3570
	100	6	255	255	255	1530	1530				255	115	255	255	255	29325	29325
	101	69	255	255	255	17595	17595				256	2	255	255	255	510	510
	102	3	255	255	255	765	765				257	20	255	255	255	5100	5100
	103	99	255	255	255	25245	25245				258	37	255	255	255	9435	9435
	104	6	255	255	255	1530	1530				259	22	255	255	255	5610	5610
	105	3	255	255	255	765	765				260	3	255	255	255	765	765
	106	150	255	255	255	38250	38250				261	2	255	255	255	510	510
	107	5	255	255	255	1275	1275				262	8	255	255	255	2040	2040
	108	54	255	255	255	13770	13770				263	2	255	255	255	510	510
	109	209	255	255	255	53295	53295				264	2	255	255	255	510	510
	110	10	255	255	255	2550	2550				265	20	255	255	255	5100	5100
	111	2	255	255	255	510	510				266	2	255	255	255	510	510
	112	166	255	255	255	42330	42330				267	2	255	255	255	510	510
	113	2	255	255	255	510	510				268	540	255	255	255	137700	137700
	114	89	255	255	255	22695	22695				269	9	255	255	255	2295	2295
	115	2	255	255	255	510	510				270	3	255	255	255	765	765
	116	3	255	255	255	765	765				271	31	255	255	255	7905	7905
	117	45	255	255	255	11475	11475				272	3	255	255	255	765	765
	118	2	255	255	255	510	510				273	167	255	255	255	42585	42585
	119	2	255	255	255	510	510				274	12	255	255	255	3060	3060
	120	93	255	255	255	23715	23715				275	2	255	255	255	510	510
	121	5	255	255	255	1275	1275				276	20	255	255	255	5100	5100
	122	5	255	255	255	1275	1275				277	28	255	255	255	7140	7140
	123	2	255	255	255	510	510				278	2	255	255	255	510	510
	124	2	255	255	255	510	510				279	3	255	255	255	765	765
	125	2	255	255	255	510	510				1	283	255	255	255	72165	72165
	126	11	255	255	255	2805	2805				2	103	255	255	255	26265	26265
	127	48	255	255	255	12240	12240				3	88	255	255	255	22440	22440
	128	5	255	255	255	1275	1275				4	98	255	255	255	24990	24990
	129	6	255	255	255	1530	1530				5	2	255	255	255	510	510
	130	2	255	255	255	510	510				6	19	255	255	255	4845	4845
	131	2	255	255	255	510	510				7	3	255	255	255	765	765
											8	7	255	255	255	1785	1785
											9	3	255	255	255	765	765
											10	528	255	255	255	134640	134640
											11	449	255	255	255	114495	114495
											12	2	255	255	255	510	510
											13	113	255	255	255	28815	28815
											14	2	255	255	255	510	510
											15	61	255	255	255	15555	15555
											16	2	255	255	255	510	510
											17	137	255	255	255	34935	34935
											18	79	255	255	255	20145	20145
											19	98	255	255	255	24990	24990
											20	9	255	255	255	2295	2295
											21	2	255	255	255	510	510
											22	203	255	255	255	51765	51765
											23	7	255	255	255	1785	1785
											24	43	255	255	255	10965	10965
											25	6	255	255	255	1530	1530
											26	2	255	255	255	510	510
											27	20	255	255	255	5100	5100
											28	65	255	255	255	16575	16575
											29	2	255	255	255	510	510
											30	2	255	255	255	510	510
											31	2	255	255	255	510	510
											32	43	255	255	255	10965	10965
											33	6	255	255	255	1530	1530
											34	155	255	255	255	39525	39525
											35	6	255	255	255	1530	1530
											36	92	255	255	255	23460	23460
											37	17	255	255	255	4335	4335
											38	400	255	255	255	102000	102000
											39	2	255	255	255	510	510
											40	3	255	255	255	765	765
											41	14	255	255	255	3570	3570
											42	2	255	255	255	510	510
											43	3	255	255	255	765	765
											44	66	255	255	255	16830	16830
											45	50	255	255	255	12750	12750
											46	65	255	255	255	16575	16575
											47	98	255	255	255	24990	24990
											48	32	255	255	255	8160	8160
											49	3	255	255	255	765	765
											50	196	255	255	255	49980	49980
											51	2	255	255	255	510	510
											52	30	255	255	255	7650	7650
											53	3	255	255	255	765	765
											54	1041	255	255	255	265455	265455
											55	204	255	255	255	52020	52020
											56	12	255	255	255	3060	3060
											57	35	255	255	255	8925	8925
											58	2	255	255	255	510	510
											59	10	255	255	255	2550	2550
											60	570	255	255	255	145350	145350
											61	4	255	255	255	1020	1020
											62	2	255	255	255	510	510
											63	27	255	255	255	6885	6885
											64	237	255	255	255	60435	60435
											65	189	255	255	255	48195	48195
											66	2	255	255	255	510	510
											67	79	255	255	255	20145	20145
											68	21	255	255	255	5355	5355
											69	2	255	255	255	510	510
											70	2	255	255	255	510	510
											71	3	255	255	255	765	765
											72	73	255	255	255	18615	18615
											73	2	255	255	255	510	510
											74	2	255	255	255	510	510
											75	3	255	255	255	765	765
											76	150	255	255	255	38250	38250
											77	4	255	255	255	1020	1020
											78	6	255	255	255	1530	1530
											79	90	255	255	255	22950	22950
											80	36	255	255	255	9180	9180
											81	2	255	255	255	510	510
											82	3	255	255	255	765	765
											83	476	255	255	255	121380	121380
											84	163	255	255	255	41565	41565
											85	2	255	255	255	510	510
											86	2	255	255	255	510	510
											87	3	255	255	255	765	765
											88	335	255	255	255	85425	85425
											89	5	255	255	255	1275	1275
											90	63	255	255	255	16065	16065
											91	4	255	255	255	1020	1020
											92	167	255	255	255	42585	42585
											93	103	255	255	255	26265	26265
											94	4	255	255	255	1020	1020
											95	4	255	255	255	1020	1020
											96	4	255	255	255	1020	1020
											97	2	255	255	255	510	510
											98	428	255	255	255	109140	109140
											99	266	255	255	255	67830	67830
											100	2	255	255	255	510	510
											101	3	255	255	255	765	765
											102	18	255	255	255	4590	4590
											103	393	255	255	255	100215	100215
											104	2	255	255	255	510	510
											105	8	255	255	255	2040	2040
											106	150	255	255	255	38250	38250
											107	13	255	255	255	3315	3315
											108	536	255	255	255	136680	136680
											109	2	255	255	255	510	510
											110	3	255	255	255	765	765
											111	96	255	255	255	24480	24480
											112	3	255	255	255	765	765
											113	2	255	255	255	510	510
											114	82	255	255	255	20910	20910
											115	115	255	255	255	29325	29325
											116	92	255	255	255	23460	23460
											117	21	255	255	255	5355	5355
											118	2	255	255	255	510	510
											119	6	255	255	255	1530	1530
											120	106	255	255	255	27030	27030
											121	23	255	255	255	5865	5865
											122	76	255	255	255	19380	19380
											123	6	255	255	255	1530	1530
											124	102	255	255	255	26010	26010
											125	2	255	255	255	510	510
											126	79	255	255	255	20145	20145
											127	1160	255	255	255	295800	295800
											128	4	255	255	255	1020	1020
											129	49	255	255	255	12495	12495
											130	3	255	255	255	765	765
											131	64	255	255	255	16320	16320
											132	152	255	255	255	38760	38760
											133	9	255	255	255	2295	2295
											134	2	255	255	255	510	510
											135	23	255	255	255	5865	5865
											136	2	255	255	255	510	510
											137	3	255	255	255	765	765
											138	19	255	255	255	4845	4845
											139	687	255	255	255	175185	175185
											140	44	255	255	255	11220	11220
											141	2	255	255	255	510	510
											142	159	255	255	255	40545	40545
											143	65	255	255	255	16575	16575
											144	5	255	255	255	1275	1275
											145	6	255	255	255	1530	1530
											146	10	255	255	255	2550	2550
											147	114	255	255	255	29070	29070
											148	208	255	255	255	53040	53040
											149	3	255	255	255	765	765
											150	637	255	255	255	162435	162435
											151	97	255	255	255	24735	24735
											152	80	255	255	255	20400	20400
											153	103	255	255	255	26265	26265
											154	81	255	255	255	20655	20655
											155	29	255	255	255	7395	7395
											156	3	255	255	255	765	765
											157	2	255	255	255	510	510
											158	6	255	255	255	1530	1530
											159	2	255	255	255	510	510
											160	2	255	255	255	510	510
											161	13	255	255	255	3315	3315
											162	772	255	255	255	196860	196860
											163	4	255	255	255	1020	1020
											164	144	255	255	255	36720	36720
											165	6	255	255	255	1530	1530
											166	2	255	255	255	510	510
											167	218	255	255	255	55590	55590
											168	8	255	255	255	2040	2040
											169	9	255	255	255	2295	2295
											170	23	255	255	255	5865	5865
											171	89	255	255	255	22695	22695
											172	16	255	255	255	4080	4080
											173	8	255	255	255	2040	2040
											174	4	255	255	255	1020	1020
											175	25	255	255	255	6375	6375
											176	16	255	255	255	4080	4080
											177	5	255	255	255	1275	1275
											178	139	255	255	255	35445	35445
											179	93	255	255	255	23715	23715
											180	2	255	255	255	510	510
											181	2	255	255	255	510	510
											182	3	255	255	255	765	765
											183	35	255	255	255	8925	8925
											184	98	255	255	255	24990	24990
											185	20	255	255	255	5100	5100
											186	1020	255	255	255	260100	260100
											187	2	255	255	255	510	510
											188	2	255	255	255	510	510
											189	128	255	255	255	32640	32640
											190	4	255	255	255	1020	1020
											191	2	255	255	255	510	510
											192	3	255	255	255	765	765
											193	3	255	255	255	765	765
											194	20	255	255	255	5100	5100
											195	2	255	255	255	510	510
											196	238	255	255	255	60690	60690
											197	213	255	255	255	54315	54315
											198	37	255	255	255	9435	9435
											199	2	255	255	255	510	510
											200	94	255	255	255	23970	23970
											201	15	255	255	255	3825	3825
											202	5	255	255	255	1275	1275
											203	4	255	255	255	1020	1020
											204	54	255	255	255	13770	13770
											205	93	255	255	255	23715	23715
											206	4	255	255	255	1020	1020
											207	3	255	255	255	765	765
											208	2	255	255	255	510	510
											209	2	255	255	255	510	510
											210	10	255	255	255	2550	2550
											211	20	255	255	255	5100	5100
											212	45	255	255	255	11475	11475
											213	119	255	255	255	30345	30345
											214	73	255	255	255	18615	18615
											215	14	255	255	255	3570	3570
											216	601	255	255	255	153255	153255
											217	194	255	255	255	49470	49470
											218	2	255	255	255	510	510
											219	22	255	255	255	5610	5610
											220	3	255	255	255	765	765
											221	171	255	255	255	43605	43605
											222	21	255	255	255	5355	5355
											223	5	255	255	255	1275	1275
											224	10	255	255	255	2550	2550
											225	2	255	255	255	510	510
											226	3	255	255	255	765	765
											227	18	255	255	255	4590	4590
											228	2	255	255	255	510	510
											229	7	255	255	255	1785	1785
											230	2	255	255	255	510	510
											231	2	255	255	255	510	510
											232	2	255	255	255	510	510
											233	2	255	255	255	510	510
											234	297	255	255	255	75735	75735
											235	30	255	255	255	7650	7650
											236	4	255	255	255	1020	1020
											237	13	255	255	255	3315	3315
											238	13	255	255	255	3315	3315
											239	3	255	255	255	765	765
											240	4	255	255	255	1020	1020
											241	194	255	255	255	49470	49470
											242	2	255	255	255	510	510
											243	3	255	255	255	765	765
											244	2	255	255	255	510	510
											245	3	255	255	255	765	765
											246	2	255	255	255	510	510
											247	5	255	255	255	1275	1275
											248	109	255	255	255	27795	27795
											249	44	255	255	255	11220	11220
											250	2	255	255	255	510	510
											251	2	255	255	255	510	510
											252	29	255	255	255	7395	7395
											253	8	255	255	255	2040	2040
											254	19	255	255	255	4845	4845
											255	175	255	255	255	44625	44625
											256	3	255	255	255	765	765
											257	2	255	255	255	510	510
											258	2	255	255	255	510	510
											259	136	255	255	255	34680	34680
											260	2	255	255	255	510	510
											261	16	255	255	255	4080	4080
											262	2	255	255	255	510	510
											263	33	255	255	255	8415	8415
											264	102	255	255	255	26010	26010
											265	2	255	255	255	510	510
											266	90	255	255	255	22950	22950
											267	37	255	255	255	9435	9435
											268	126	255	255	255	32130	32130
											269	11	255	255	255	2805	2805
											270	4	255	255	255	1020	1020
											271	2	255	255	255	510	510
											272	241	255	255	255	61455	61455
											273	5	255	255	255	1275	1275
											274	4	255	255	255	1020	1020
											275	4	255	255	255	1020	1020
											276	4	255	255	255	1020	1020
											277	1607	255	255	255	409785	409785
											278	2	255	255	255	510	510
											279	108	255	255	255	27540	27540
											280	70	255	255	255	17850	17850
											281	3	255	255	255	765	765
											282	3	255	255	255	765	765
											283	13	255	255	255	3315	3315
											284	78	255	255	255	19890	19890
											285	2	255	255	255	510	510
											286	2	255	255	255	510	510
											287	23	255	255	255	5865	5865
											288	4	255	255	255	1020	1020
											289	66	255	255	255	16830	16830
											290	19	255	255	255	4845	4845
											291	3	255	255	255	765	765
											292	2	255	255	255	510	510
											293	5	255	255	255	1275	1275
											294	12	255	255	255	3060	3060
											295	3	255	255	255	765	765
											296	3	255	255	255	765	765
											297	5	255	255	255	1275	1275
											298	3	255	255	255	765	765
											299	2	255	255	255	510	510
											300	63	255	255	255	16065	16065
											301	22	255	255	255	5610	5610
											302	31	255	255	255	7905	7905
											303	14	255	255	255	3570	3570
											304	2	255	255	255	510	510
											305	4	255	255	255	1020	1020
											306	2	255	255	255	510	510
											307	131	255	255	255	33405	33405
											308	540	255	255	255	137700	137700
											309	2	255	255	255	510	510
											310	2	255	255	255	510	510
											311	2	255	255	255	510	510
											312	2	255	255	255	510	510
											313	2	255	255	255	510	510
											314	15	255	255	255	3825	3825
											315	26	255	255	255	6630	6630
											316	5	255	255	255	1275	1275
											1	32347	255	255	255	8248485	8248485
											2	7	255	255	255	1785	1785
											3	5	255	255	255	1275	1275
											4	52	255	255	255	13260	13260
											5	1492	255	255	255	380460	380460
											6	14	255	255	255	3570	3570
											7	2	255	255	255	510	510
											8	2	255	255	255	510	510
											9	452	255	255	255	115260	115260
											10	23	255	255	255	5865	5865
											11	2	255	255	255	510	510
											12	66	255	255	255	16830	16830
											13	2	255	255	255	510	510
											14	97	255	255	255	24735	24735
											15	6	255	255	255	1530	1530
											16	3	255	255	255	765	765
											17	3	255	255	255	765	765
											18	3	255	255	255	765	765
											19	2	255	255	255	510	510
											20	2	255	255	255	510	510
											21	2	255	255	255	510	510
											22	2	255	255	255	510	510
											23	214	255	255	255	54570	54570
											24	2	255	255	255	510	510
											25	2698	255	255	255	687990	687990
											26	2	255	255	255	510	510
											27	631	255	255	255	160905	160905
											28	5	255	255	255	1275	1275
											29	16	255	255	255	4080	4080
											30	10	255	255	255	2550	2550
											31	26	255	255	255	6630	6630
											32	4	255	255	255	1020	1020
											33	17	255	255	255	4335	4335
											34	2	255	255	255	510	510
											35	3	255	255	255	765	765
											36	2	255	255	255	510	510
											37	2	255	255	255	510	510
											38	103	255	255	255	26265	26265
											39	186	255	255	255	47430	47430
											40	3	255	255	255	765	765
											41	2	255	255	255	510	510
											42	4	255	255	255	1020	1020
											43	2	255	255	255	510	510
											44	250	255	255	255	63750	63750
											45	180	255	255	255	45900	45900
											46	274	255	255	255	69870	69870
											47	2	255	255	255	510	510
											48	4	255	255	255	1020	1020
											49	2	255	255	255	510	510
											50	61	255	255	255	15555	15555
											51	82	255	255	255	20910	20910
											52	5	255	255	255	1275	1275
											53	23	255	255	255	5865	5865
											54	124	255	255	255	31620	31620
											55	6	255	255	255	1530	1530
											56	196	255	255	255	49980	49980
											57	6	255	255	255	1530	1530
											58	2	255	255	255	510	510
											59	308	255	255	255	78540	78540
											60	8	255	255	255	2040	2040
											61	2	255	255	255	510	510
											62	3	255	255	255	765	765
											63	628	255	255	255	160140	160140
											64	6	255	255	255	1530	1530
											65	2	255	255	255	510	510
											66	2	255	255	255	510	510
											67	2	255	255	255	510	510
											68	5	255	255	255	1275	1275
											69	2	255	255	255	510	510
											70	2	255	255	255	510	510
											71	429	255	255	255	109395	109395
											72	11	255	255	255	2805	2805
											73	2	255	255	255	510	510
											74	7	255	255	255	1785	1785
											75	6	255	255	255	1530	1530
											76	2	255	255	255	510	510
											77	3	255	255	255	765	765
											78	2	255	255	255	510	510
											79	3	255	255	255	765	765
											80	4	255	255	255	1020	1020
											81	3	255	255	255	765	765
											82	231	255	255	255	58905	58905
											83	2	255	255	255	510	510
											84	3	255	255	255	765	765
											85	11	255	255	255	2805	2805
											86	5	255	255	255	1275	1275
											87	2	255	255	255	510	510
											88	2	255	255	255	510	510
											89	5	255	255	255	1275	1275
											90	279	255	255	255	71145	71145
											91	3	255	255	255	765	765
											92	107	255	255	255	27285	27285
											93	2	255	255	255	510	510
											94	102	255	255	255	26010	26010
											95	3	255	255	255	765	765
											96	2	255	255	255	510	510
											97	60	255	255	255	15300	15300
											98	2	255	255	255	510	510
											99	138	255	255	255	35190	35190
											100	119	255	255	255	30345	30345
											101	2	255	255	255	510	510
											102	2	255	255	255	510	510
											103	5	255	255	255	1275	1275
											104	3	255	255	255	765	765
											105	101	255	255	255	25755	25755
											106	224	255	255	255	57120	57120
											107	2	255	255	255	510	510
											108	2	255	255	255	510	510
											109	2	255	255	255	510	510
											110	2	255	255	255	510	510
											111	3	255	255	255	765	765
											112	7	255	255	255	1785	1785
											113	3	255	255	255	765	765
											114	182	255	255	255	46410	46410
											115	4	255	255	255	1020	1020
											116	3	255	255	255	765	765
											117	397	255	255	255	101235	101235
											118	2	255	255	255	510	510
											119	2	255	255	255	510	510
											120	2	255	255	255	510	510
											121	2	255	255	255	510	510
											122	813	255	255	255	207315	207315
											123	4	255	255	255	1020	1020
											124	2	255	255	255	510	510
											125	9	255	255	255	2295	2295
											126	2	255	255	255	510	510
											127	7	255	255	255	1785	1785
											128	74	255	255	255	18870	18870
											129	158	255	255	255	40290	40290
											130	5	255	255	255	1275	1275
											131	2	255	255	255	510	510
											132	4	255	255	255	1020	1020
											133	2	255	255	255	510	510
											134	2	255	255	255	510	510
											135	178	255	255	255	45390	45390
											136	228	255	255	255	58140	58140
											137	6	255	255	255	1530	1530
											138	3	255	255	255	765	765
											139	8	255	255	255	2040	2040
											140	463	255	255	255	118065	118065
											141	2	255	255	255	510	510
											142	5	255	255	255	1275	1275
											143	6	255	255	255	1530	1530
											144	3	255	255	255	765	765
											145	2	255	255	255	510	510
											146	38	255	255	255	9690	9690
											147	37	255	255	255	9435	9435
											148	42	255	255	255	10710	10710
											149	2	255	255	255	510	510
											150	15	255	255	255	3825	3825
											151	199	255	255	255	50745	50745
											152	687	255	255	255	175185	175185
											153	2	255	255	255	510	510
											154	2	255	255	255	510	510
											155	2	255	255	255	510	510
											156	4	255	255	255	1020	1020
											157	5	255	255	255	1275	1275
											158	613	255	255	255	156315	156315
											159	2	255	255	255	510	510
											160	2	255	255	255	510	510
											161	68	255	255	255	17340	17340
											162	2	255	255	255	510	510
											163	197	255	255	255	50235	50235
											164	29	255	255	255	7395	7395
											165	2	255	255	255	510	510
											166	2	255	255	255	510	510
											167	2	255	255	255	510	510
											168	4	255	255	255	1020	1020
											169	47	255	255	255	11985	11985
											170	799	255	255	255	203745	203745
											171	2	255	255	255	510	510
											172	8	255	255	255	2040	2040
											173	5	255	255	255	1275	1275
											174	10	255	255	255	2550	2550
											175	2	255	255	255	510	510
											176	5	255	255	255	1275	1275
											177	3	255	255	255	765	765
											178	2	255	255	255	510	510
											179	7	255	255	255	1785	1785
											180	2	255	255	255	510	510
											181	53	255	255	255	13515	13515
											182	706	255	255	255	180030	180030
											183	6	255	255	255	1530	1530
											184	14	255	255	255	3570	3570
											185	2	255	255	255	510	510
											186	2	255	255	255	510	510
											187	128	255	255	255	32640	32640
											188	2	255	255	255	510	510
											189	4	255	255	255	1020	1020
											190	64	255	255	255	16320	16320
											191	4	255	255	255	1020	1020
											192	3086	255	255	255	786930	786930
											193	8	255	255	255	2040	2040
											194	5	255	255	255	1275	1275
											195	25	255	255	255	6375	6375
											196	4	255	255	255	1020	1020
											197	2	255	255	255	510	510
											198	2	255	255	255	510	510
											199	19	255	255	255	4845	4845
											200	2	255	255	255	510	510
											201	2	255	255	255	510	510
											202	2	255	255	255	510	510
											203	149	255	255	255	37995	37995
											204	24	255	255	255	6120	6120
											205	2	255	255	255	510	510
											206	2	255	255	255	510	510
											207	16	255	255	255	4080	4080
											208	56	255	255	255	14280	14280
											209	18	255	255	255	4590	4590
											210	3	255	255	255	765	765
											211	2	255	255	255	510	510
											212	64	255	255	255	16320	16320
											213	4	255	255	255	1020	1020
											214	3	255	255	255	765	765
											215	3	255	255	255	765	765
											216	212	255	255	255	54060	54060
											217	247	255	255	255	62985	62985
											218	6	255	255	255	1530	1530
											219	13	255	255	255	3315	3315
											220	2	255	255	255	510	510
											221	4	255	255	255	1020	1020
											222	3	255	255	255	765	765
											223	5	255	255	255	1275	1275
											224	2	255	255	255	510	510
											225	3	255	255	255	765	765
											226	2	255	255	255	510	510
											227	4	255	255	255	1020	1020
											228	65	255	255	255	16575	16575
											229	3	255	255	255	765	765
											230	4	255	255	255	1020	1020
											231	3	255	255	255	765	765
											232	3	255	255	255	765	765
											233	2	255	255	255	510	510
											234	2	255	255	255	510	510
											235	2	255	255	255	510	510
											236	6	255	255	255	1530	1530
											237	2	255	255	255	510	510
											238	2	255	255	255	510	510
											239	43	255	255	255	10965	10965
											240	190	255	255	255	48450	48450
											241	76	255	255	255	19380	19380
											242	4	255	255	255	1020	1020
											243	3	255	255	255	765	765
											244	42	255	255	255	10710	10710
											245	79	255	255	255	20145	20145
											246	81	255	255	255	20655	20655
											247	2	255	255	255	510	510
											248	3	255	255	255	765	765
											249	2	255	255	255	510	510
											250	26	255	255	255	6630	6630
											251	3	255	255	255	765	765
											252	3	255	255	255	765	765
											253	3	255	255	255	765	765
											254	2	255	255	255	510	510
											255	2	255	255	255	510	510
											256	18	255	255	255	4590	4590
											257	2	255	255	255	510	510
											258	2	255	255	255	510	510
											259	2	255	255	255	510	510
											260	3	255	255	255	765	765
											261	2	255	255	255	510	510
											262	4	255	255	255	1020	1020
											263	2	255	255	255	510	510
											264	6	255	255	255	1530	1530
											265	323	255	255	255	82365	82365
											266	13	255	255	255	3315	3315
											267	2	255	255	255	510	510
											268	7	255	255	255	1785	1785
											269	674	255	255	255	171870	171870
											270	2	255	255	255	510	510
											271	4	255	255	255	1020	1020
											272	122	255	255	255	31110	31110
											273	960	255	255	255	244800	244800
											274	4	255	255	255	1020	1020
											275	3	255	255	255	765	765
											276	3	255	255	255	765	765
											277	4	255	255	255	1020	1020
											278	2	255	255	255	510	510
											279	2	255	255	255	510	510
											280	59	255	255	255	15045	15045
											281	2	255	255	255	510	510
											282	66	255	255	255	16830	16830
											283	119	255	255	255	30345	30345
											284	121	255	255	255	30855	30855
											285	2	255	255	255	510	510
											286	39	255	255	255	9945	9945
											287	3	255	255	255	765	765
											288	4	255	255	255	1020	1020
											289	8	255	255	255	2040	2040
											290	1401	255	255	255	357255	357255
											291	15	255	255	255	3825	3825
											292	6	255	255	255	1530	1530
											293	2	255	255	255	510	510
											294	2	255	255	255	510	510
											295	69	255	255	255	17595	17595
											296	3	255	255	255	765	765
											297	98	255	255	255	24990	24990
											298	7	255	255	255	1785	1785
											299	45	255	255	255	11475	11475
											300	2	255	255	255	510	510
											301	12	255	255	255	3060	3060
											302	2	255	255	255	510	510
											303	2	255	255	255	510	510
											304	178	255	255	255	45390	45390
											305	5	255	255	255	1275	1275
											306	3	255	255	255	765	765
											307	73	255	255	255	18615	18615
											308	2	255	255	255	510	510
											309	59	255	255	255	15045	15045
											310	167	255	255	255	42585	42585
											311	4749	255	255	255	1210995	1210995
											312	2	255	255	255	510	510
											313	2	255	255	255	510	510
											314	77	255	255	255	19635	19635
											315	86	255	255	255	21930	21930
											316	4	255	255	255	1020	1020
											317	2	255	255	255	510	510
											318	23	255	255	255	5865	5865
											319	2	255	255	255	510	510
											320	4	255	255	255	1020	1020
											321	111	255	255	255	28305	28305
											322	2	255	255	255	510	510
											323	2	255	255	255	510	510
											324	26	255	255	255	6630	6630
											325	2	255	255	255	510	510
											326	2	255	255	255	510	510
											327	2	255	255	255	510	510
											328	3	255	255	255	765	765
											329	42	255	255	255	10710	10710
											330	2	255	255	255	510	510
											331	636	255	255	255	162180	162180
											332	2	255	255	255	510	510
											333	87	255	255	255	22185	22185
											334	2	255	255	255	510	510
											335	3	255	255	255	765	765
											336	7	255	255	255	1785	1785
											337	2	255	255	255	510	510
											338	2	255	255	255	510	510
											339	189	255	255	255	48195	48195
											340	255	255	255	255	65025	65025
											341	3	255	255	255	765	765
											342	2	255	255	255	510	510
											343	3	255	255	255	765	765
											344	58	255	255	255	14790	14790
											345	3	255	255	255	765	765
											346	2	255	255	255	510	510
											347	2	255	255	255	510	510
											348	2	255	255	255	510	510
											349	6	255	255	255	1530	1530
											350	3	255	255	255	765	765
											351	17	255	255	255	4335	4335
											352	2	255	255	255	510	510
											353	16	255	255	255	4080	4080
											354	3	255	255	255	765	765
											355	8	255	255	255	2040	2040
											356	3	255	255	255	765	765
											357	2	255	255	255	510	510
											358	4	255	255	255	1020	1020
											359	2	255	255	255	510	510
											360	5	255	255	255	1275	1275
											361	2	255	255	255	510	510
											362	6	255	255	255	1530	1530
											363	6	255	255	255	1530	1530
											364	11	255	255	255	2805	2805
											365	12	255	255	255	3060	3060
											366	2	255	255	255	510	510
											367	2	255	255	255	510	510
											368	9	255	255	255	2295	2295
											369	5	255	255	255	1275	1275
											370	4	255	255	255	1020	1020
											371	81	255	255	255	20655	20655
											372	170	255	255	255	43350	43350
											373	2	255	255	255	510	510
											374	2	255	255	255	510	510
											375	2	255	255	255	510	510
											376	2	255	255	255	510	510
											377	2	255	255	255	510	510
											378	2	255	255	255	510	510
											379	3	255	255	255	765	765
											380	15	255	255	255	3825	3825
											381	5	255	255	255	1275	1275
											382	2	255	255	255	510	510
											383	2	255	255	255	510	510
											384	68	255	255	255	17340	17340
											385	2	255	255	255	510	510
											386	98	255	255	255	24990	24990
											387	2	255	255	255	510	510
											388	3	255	255	255	765	765
											389	15	255	255	255	3825	3825
											390	2	255	255	255	510	510
											391	2	255	255	255	510	510
											392	239	255	255	255	60945	60945
											393	2	255	255	255	510	510
											394	151	255	255	255	38505	38505
											395	2	255	255	255	510	510
											396	6	255	255	255	1530	1530
											397	214	255	255	255	54570	54570
											398	534	255	255	255	136170	136170
											399	2	255	255	255	510	510
											400	61	255	255	255	15555	15555
											401	5	255	255	255	1275	1275
											402	2	255	255	255	510	510
											403	3	255	255	255	765	765
											404	4	255	255	255	1020	1020
											405	2	255	255	255	510	510
											406	2	255	255	255	510	510
											407	3	255	255	255	765	765
											408	2	255	255	255	510	510
											409	80	255	255	255	20400	20400
											410	2	255	255	255	510	510
											411	70	255	255	255	17850	17850
											412	35	255	255	255	8925	8925
											413	98	255	255	255	24990	24990
											414	2	255	255	255	510	510
											415	3	255	255	255	765	765
											416	13	255	255	255	3315	3315
											417	6	255	255	255	1530	1530
											418	2	255	255	255	510	510
											419	22	255	255	255	5610	5610
											420	3	255	255	255	765	765
											421	4	255	255	255	1020	1020
											422	14	255	255	255	3570	3570
											423	5	255	255	255	1275	1275
											424	22	255	255	255	5610	5610
											425	15	255	255	255	3825	3825
											426	6	255	255	255	1530	1530
											427	2	255	255	255	510	510
											428	4	255	255	255	1020	1020
											1	41	255	255	255	10455	10455
											2	35561	255	255	255	9068055	9068055
											3	60	255	255	255	15300	15300
											4	37	255	255	255	9435	9435
											5	6	255	255	255	1530	1530
											6	181	255	255	255	46155	46155
											7	2	255	255	255	510	510
											8	91	255	255	255	23205	23205
											9	3	255	255	255	765	765
											10	5	255	255	255	1275	1275
											11	3	255	255	255	765	765
											12	3	255	255	255	765	765
											13	13	255	255	255	3315	3315
											14	15	255	255	255	3825	3825
											15	2	255	255	255	510	510
											16	5	255	255	255	1275	1275
											17	3	255	255	255	765	765
											18	2	255	255	255	510	510
											19	2	255	255	255	510	510
											20	3	255	255	255	765	765
											21	3	255	255	255	765	765
											22	2	255	255	255	510	510
											23	323	255	255	255	82365	82365
											24	2	255	255	255	510	510
											25	2	255	255	255	510	510
											26	18	255	255	255	4590	4590
											27	49	255	255	255	12495	12495
											28	2	255	255	255	510	510
											29	2	255	255	255	510	510
											30	2	255	255	255	510	510
											31	3	255	255	255	765	765
											32	83	255	255	255	21165	21165
											33	14	255	255	255	3570	3570
											34	5	255	255	255	1275	1275
											35	4	255	255	255	1020	1020
											36	2	255	255	255	510	510
											37	3	255	255	255	765	765
											38	214	255	255	255	54570	54570
											39	2	255	255	255	510	510
											40	11	255	255	255	2805	2805
											41	4	255	255	255	1020	1020
											42	3	255	255	255	765	765
											43	140	255	255	255	35700	35700
											44	69	255	255	255	17595	17595
											45	2	255	255	255	510	510
											46	2	255	255	255	510	510
											47	2	255	255	255	510	510
											48	3	255	255	255	765	765
											49	5	255	255	255	1275	1275
											50	101	255	255	255	25755	25755
											51	2	255	255	255	510	510
											52	2	255	255	255	510	510
											53	65	255	255	255	16575	16575
											54	3	255	255	255	765	765
											55	3	255	255	255	765	765
											56	2	255	255	255	510	510
											57	2	255	255	255	510	510
											58	40	255	255	255	10200	10200
											59	939	255	255	255	239445	239445
											60	3	255	255	255	765	765
											61	2	255	255	255	510	510
											62	5	255	255	255	1275	1275
											63	8	255	255	255	2040	2040
											64	2	255	255	255	510	510
											65	24	255	255	255	6120	6120
											66	3	255	255	255	765	765
											67	2	255	255	255	510	510
											68	2	255	255	255	510	510
											69	5	255	255	255	1275	1275
											70	3	255	255	255	765	765
											71	2	255	255	255	510	510
											72	2	255	255	255	510	510
											73	2	255	255	255	510	510
											74	2	255	255	255	510	510
											75	2	255	255	255	510	510
											76	3	255	255	255	765	765
											77	2	255	255	255	510	510
											78	2	255	255	255	510	510
											79	2	255	255	255	510	510
											80	5	255	255	255	1275	1275
											81	2	255	255	255	510	510
											82	5	255	255	255	1275	1275
											83	3	255	255	255	765	765
											84	2	255	255	255	510	510
											85	2	255	255	255	510	510
											86	3	255	255	255	765	765
											87	2	255	255	255	510	510
											88	4	255	255	255	1020	1020
											89	5	255	255	255	1275	1275
											90	95	255	255	255	24225	24225
											91	2	255	255	255	510	510
											92	120	255	255	255	30600	30600
											93	2	255	255	255	510	510
											94	23	255	255	255	5865	5865
											95	4	255	255	255	1020	1020
											96	3	255	255	255	765	765
											97	47	255	255	255	11985	11985
											98	2	255	255	255	510	510
											99	2	255	255	255	510	510
											100	2	255	255	255	510	510
											101	22	255	255	255	5610	5610
											102	4	255	255	255	1020	1020
											103	3	255	255	255	765	765
											104	2	255	255	255	510	510
											105	9	255	255	255	2295	2295
											106	10	255	255	255	2550	2550
											107	2	255	255	255	510	510
											108	4	255	255	255	1020	1020
											109	2	255	255	255	510	510
											110	37	255	255	255	9435	9435
											111	3	255	255	255	765	765
											112	2	255	255	255	510	510
											113	2	255	255	255	510	510
											114	25	255	255	255	6375	6375
											115	3	255	255	255	765	765
											116	447	255	255	255	113985	113985
											117	3	255	255	255	765	765
											118	4	255	255	255	1020	1020
											119	22	255	255	255	5610	5610
											120	7	255	255	255	1785	1785
											121	6	255	255	255	1530	1530
											122	42	255	255	255	10710	10710
											123	2	255	255	255	510	510
											124	4	255	255	255	1020	1020
											125	81	255	255	255	20655	20655
											126	2	255	255	255	510	510
											127	3	255	255	255	765	765
											128	2	255	255	255	510	510
											129	2	255	255	255	510	510
											130	3	255	255	255	765	765
											131	6	255	255	255	1530	1530
											132	68	255	255	255	17340	17340
											133	4	255	255	255	1020	1020
											134	124	255	255	255	31620	31620
											135	2	255	255	255	510	510
											136	9	255	255	255	2295	2295
											137	4	255	255	255	1020	1020
											138	3	255	255	255	765	765
											139	5	255	255	255	1275	1275
											140	2	255	255	255	510	510
											141	2	255	255	255	510	510
											142	55	255	255	255	14025	14025
											143	45	255	255	255	11475	11475
											144	2	255	255	255	510	510
											145	2	255	255	255	510	510
											146	2	255	255	255	510	510
											147	29	255	255	255	7395	7395
											148	2	255	255	255	510	510
											149	2	255	255	255	510	510
											150	2	255	255	255	510	510
											151	125	255	255	255	31875	31875
											152	4	255	255	255	1020	1020
											153	2	255	255	255	510	510
											154	2	255	255	255	510	510
											155	7	255	255	255	1785	1785
											156	186	255	255	255	47430	47430
											157	28	255	255	255	7140	7140
											158	3	255	255	255	765	765
											159	12	255	255	255	3060	3060
											160	181	255	255	255	46155	46155
											161	2	255	255	255	510	510
											162	5	255	255	255	1275	1275
											163	2	255	255	255	510	510
											164	3	255	255	255	765	765
											165	3	255	255	255	765	765
											166	2	255	255	255	510	510
											167	2	255	255	255	510	510
											168	128	255	255	255	32640	32640
											169	3	255	255	255	765	765
											170	4	255	255	255	1020	1020
											171	5	255	255	255	1275	1275
											172	2	255	255	255	510	510
											173	3	255	255	255	765	765
											174	6	255	255	255	1530	1530
											175	2	255	255	255	510	510
											176	3	255	255	255	765	765
											177	22	255	255	255	5610	5610
											178	2	255	255	255	510	510
											179	2	255	255	255	510	510
											180	102	255	255	255	26010	26010
											181	2	255	255	255	510	510
											182	14	255	255	255	3570	3570
											183	11	255	255	255	2805	2805
											184	2	255	255	255	510	510
											185	4	255	255	255	1020	1020
											186	2	255	255	255	510	510
											187	66	255	255	255	16830	16830
											188	115	255	255	255	29325	29325
											189	78	255	255	255	19890	19890
											190	2	255	255	255	510	510
											191	2	255	255	255	510	510
											192	2	255	255	255	510	510
											193	2	255	255	255	510	510
											194	2	255	255	255	510	510
											195	55	255	255	255	14025	14025
											196	2	255	255	255	510	510
											197	2	255	255	255	510	510
											198	117	255	255	255	29835	29835
											199	2	255	255	255	510	510
											200	18	255	255	255	4590	4590
											201	2	255	255	255	510	510
											202	37	255	255	255	9435	9435
											203	109	255	255	255	27795	27795
											204	76	255	255	255	19380	19380
											205	7	255	255	255	1785	1785
											206	2	255	255	255	510	510
											207	2	255	255	255	510	510
											208	87	255	255	255	22185	22185
											209	2	255	255	255	510	510
											210	4	255	255	255	1020	1020
											211	4	255	255	255	1020	1020
											212	8	255	255	255	2040	2040
											213	233	255	255	255	59415	59415
											214	6	255	255	255	1530	1530
											215	2	255	255	255	510	510
											216	3	255	255	255	765	765
											217	2	255	255	255	510	510
											218	3	255	255	255	765	765
											219	3	255	255	255	765	765
											220	17	255	255	255	4335	4335
											221	2	255	255	255	510	510
											222	2	255	255	255	510	510
											223	50	255	255	255	12750	12750
											224	2	255	255	255	510	510
											225	3	255	255	255	765	765
											226	3	255	255	255	765	765
											227	6	255	255	255	1530	1530
											228	2	255	255	255	510	510
											229	5	255	255	255	1275	1275
											230	2	255	255	255	510	510
											231	101	255	255	255	25755	25755
											232	6	255	255	255	1530	1530
											233	2	255	255	255	510	510
											234	2	255	255	255	510	510
											235	2	255	255	255	510	510
											236	2	255	255	255	510	510
											237	2	255	255	255	510	510
											238	19	255	255	255	4845	4845
											239	2	255	255	255	510	510
											240	52	255	255	255	13260	13260
											241	4	255	255	255	1020	1020
											242	3	255	255	255	765	765
											243	2	255	255	255	510	510
											244	4	255	255	255	1020	1020
											245	32	255	255	255	8160	8160
											246	8	255	255	255	2040	2040
											247	3	255	255	255	765	765
											248	2	255	255	255	510	510
											249	24	255	255	255	6120	6120
											250	2	255	255	255	510	510
											251	2	255	255	255	510	510
											252	71	255	255	255	18105	18105
											253	3	255	255	255	765	765
											254	2	255	255	255	510	510
											255	32	255	255	255	8160	8160
											256	2	255	255	255	510	510
											257	23	255	255	255	5865	5865
											258	2	255	255	255	510	510
											259	2	255	255	255	510	510
											260	56	255	255	255	14280	14280
											261	118	255	255	255	30090	30090
											262	2	255	255	255	510	510
											263	2	255	255	255	510	510
											264	2	255	255	255	510	510
											265	2	255	255	255	510	510
											266	6	255	255	255	1530	1530
											267	358	255	255	255	91290	91290
											268	7	255	255	255	1785	1785
											269	8	255	255	255	2040	2040
											270	3	255	255	255	765	765
											271	240	255	255	255	61200	61200
											272	2	255	255	255	510	510
											273	2	255	255	255	510	510
											274	2	255	255	255	510	510
											275	41	255	255	255	10455	10455
											276	2	255	255	255	510	510
											277	118	255	255	255	30090	30090
											278	15	255	255	255	3825	3825
											279	2	255	255	255	510	510
											280	6	255	255	255	1530	1530
											281	5	255	255	255	1275	1275
											282	3	255	255	255	765	765
											283	2	255	255	255	510	510
											284	5	255	255	255	1275	1275
											285	5	255	255	255	1275	1275
											286	3	255	255	255	765	765
											287	3	255	255	255	765	765
											288	4	255	255	255	1020	1020
											289	6	255	255	255	1530	1530
											290	21	255	255	255	5355	5355
											291	2	255	255	255	510	510
											292	2	255	255	255	510	510
											293	2	255	255	255	510	510
											294	3	255	255	255	765	765
											295	120	255	255	255	30600	30600
											296	3	255	255	255	765	765
											297	2	255	255	255	510	510
											298	3	255	255	255	765	765
											299	4	255	255	255	1020	1020
											300	2	255	255	255	510	510
											301	101	255	255	255	25755	25755
											302	33	255	255	255	8415	8415
											303	2	255	255	255	510	510
											304	2	255	255	255	510	510
											305	2	255	255	255	510	510
											306	2	255	255	255	510	510
											307	2	255	255	255	510	510
											308	86	255	255	255	21930	21930
											309	2	255	255	255	510	510
											310	4	255	255	255	1020	1020
											311	2	255	255	255	510	510
											312	107	255	255	255	27285	27285
											313	4	255	255	255	1020	1020
											314	3	255	255	255	765	765
											315	3	255	255	255	765	765
											316	2	255	255	255	510	510
											317	2	255	255	255	510	510
											318	2	255	255	255	510	510
											319	2	255	255	255	510	510
											320	42	255	255	255	10710	10710
											321	4	255	255	255	1020	1020
											322	5	255	255	255	1275	1275
											323	3	255	255	255	765	765
											324	2	255	255	255	510	510
											325	2	255	255	255	510	510
											326	12	255	255	255	3060	3060
											327	317	255	255	255	80835	80835
											328	2	255	255	255	510	510
											329	142	255	255	255	36210	36210
											330	3	255	255	255	765	765
											331	2	255	255	255	510	510
											332	22	255	255	255	5610	5610
											333	4	255	255	255	1020	1020
											334	2	255	255	255	510	510
											335	17	255	255	255	4335	4335
											336	2	255	255	255	510	510
											337	2	255	255	255	510	510
											338	2	255	255	255	510	510
											339	82	255	255	255	20910	20910
											340	37	255	255	255	9435	9435
											341	69	255	255	255	17595	17595
											342	3	255	255	255	765	765
											343	4	255	255	255	1020	1020
											344	3	255	255	255	765	765
											345	2	255	255	255	510	510
											346	2	255	255	255	510	510
											347	8	255	255	255	2040	2040
											348	531	255	255	255	135405	135405
											349	2	255	255	255	510	510
											350	2	255	255	255	510	510
											351	3	255	255	255	765	765
											352	12	255	255	255	3060	3060
											353	2	255	255	255	510	510
											354	73	255	255	255	18615	18615
											355	2	255	255	255	510	510
											356	9	255	255	255	2295	2295
											357	4	255	255	255	1020	1020
											358	2	255	255	255	510	510
											359	4	255	255	255	1020	1020
											360	2	255	255	255	510	510
											361	2	255	255	255	510	510
											362	3	255	255	255	765	765
											363	3	255	255	255	765	765
											364	4	255	255	255	1020	1020
											365	2	255	255	255	510	510
											366	219	255	255	255	55845	55845
											367	2	255	255	255	510	510
											368	2	255	255	255	510	510
											369	22	255	255	255	5610	5610
											370	2	255	255	255	510	510
											1	2	255	255	255	510	510
											2	24	255	255	255	6120	6120
											3	7228	255	255	255	1843140	1843140
											4	65	255	255	255	16575	16575
											5	3	255	255	255	765	765
											6	6	255	255	255	1530	1530
											7	5	255	255	255	1275	1275
											8	125	255	255	255	31875	31875
											9	184	255	255	255	46920	46920
											10	7	255	255	255	1785	1785
											11	23	255	255	255	5865	5865
											12	4	255	255	255	1020	1020
											13	3	255	255	255	765	765
											14	2	255	255	255	510	510
											15	83	255	255	255	21165	21165
											16	75	255	255	255	19125	19125
											17	2	255	255	255	510	510
											18	2	255	255	255	510	510
											19	4	255	255	255	1020	1020
											20	2	255	255	255	510	510
											21	139	255	255	255	35445	35445
											22	3	255	255	255	765	765
											23	160	255	255	255	40800	40800
											24	2	255	255	255	510	510
											25	2	255	255	255	510	510
											26	439	255	255	255	111945	111945
											27	6149	255	255	255	1567995	1567995
											28	3	255	255	255	765	765
											29	2	255	255	255	510	510
											30	2	255	255	255	510	510
											31	4	255	255	255	1020	1020
											32	2	255	255	255	510	510
											33	2	255	255	255	510	510
											34	2	255	255	255	510	510
											35	3	255	255	255	765	765
											36	2	255	255	255	510	510
											37	4	255	255	255	1020	1020
											38	132	255	255	255	33660	33660
											39	71	255	255	255	18105	18105
											40	6	255	255	255	1530	1530
											41	3	255	255	255	765	765
											42	5	255	255	255	1275	1275
											43	6	255	255	255	1530	1530
											44	3	255	255	255	765	765
											45	192	255	255	255	48960	48960
											46	719	255	255	255	183345	183345
											47	2	255	255	255	510	510
											48	4	255	255	255	1020	1020
											49	2	255	255	255	510	510
											50	2	255	255	255	510	510
											51	222	255	255	255	56610	56610
											52	2	255	255	255	510	510
											53	2	255	255	255	510	510
											54	2	255	255	255	510	510
											55	2	255	255	255	510	510
											56	2	255	255	255	510	510
											57	8	255	255	255	2040	2040
											58	56	255	255	255	14280	14280
											59	78	255	255	255	19890	19890
											60	43	255	255	255	10965	10965
											61	4	255	255	255	1020	1020
											62	4	255	255	255	1020	1020
											63	62	255	255	255	15810	15810
											64	2	255	255	255	510	510
											65	200	255	255	255	51000	51000
											66	122	255	255	255	31110	31110
											67	5	255	255	255	1275	1275
											68	2	255	255	255	510	510
											69	9	255	255	255	2295	2295
											70	3	255	255	255	765	765
											71	7	255	255	255	1785	1785
											72	2	255	255	255	510	510
											73	3	255	255	255	765	765
											74	84	255	255	255	21420	21420
											75	2	255	255	255	510	510
											76	2	255	255	255	510	510
											77	353	255	255	255	90015	90015
											78	2	255	255	255	510	510
											79	38	255	255	255	9690	9690
											80	4	255	255	255	1020	1020
											81	77	255	255	255	19635	19635
											82	167	255	255	255	42585	42585
											83	73	255	255	255	18615	18615
											84	38	255	255	255	9690	9690
											85	2	255	255	255	510	510
											86	3	255	255	255	765	765
											87	25	255	255	255	6375	6375
											88	2	255	255	255	510	510
											89	12	255	255	255	3060	3060
											90	2	255	255	255	510	510
											91	3	255	255	255	765	765
											92	812	255	255	255	207060	207060
											93	16	255	255	255	4080	4080
											94	3	255	255	255	765	765
											95	8	255	255	255	2040	2040
											96	4	255	255	255	1020	1020
											97	4	255	255	255	1020	1020
											98	2	255	255	255	510	510
											99	118	255	255	255	30090	30090
											100	2	255	255	255	510	510
											101	2	255	255	255	510	510
											102	7	255	255	255	1785	1785
											103	2	255	255	255	510	510
											104	59	255	255	255	15045	15045
											105	7	255	255	255	1785	1785
											106	17	255	255	255	4335	4335
											107	2	255	255	255	510	510
											108	87	255	255	255	22185	22185
											109	79	255	255	255	20145	20145
											110	553	255	255	255	141015	141015
											111	141	255	255	255	35955	35955
											112	79	255	255	255	20145	20145
											113	40	255	255	255	10200	10200
											114	224	255	255	255	57120	57120
											115	2	255	255	255	510	510
											116	382	255	255	255	97410	97410
											117	89	255	255	255	22695	22695
											118	2	255	255	255	510	510
											119	462	255	255	255	117810	117810
											120	4	255	255	255	1020	1020
											121	21	255	255	255	5355	5355
											122	2382	255	255	255	607410	607410
											123	65	255	255	255	16575	16575
											124	57	255	255	255	14535	14535
											125	2	255	255	255	510	510
											126	2	255	255	255	510	510
											127	96	255	255	255	24480	24480
											128	63	255	255	255	16065	16065
											129	90	255	255	255	22950	22950
											130	3	255	255	255	765	765
											131	2	255	255	255	510	510
											132	3	255	255	255	765	765
											133	9	255	255	255	2295	2295
											134	2	255	255	255	510	510
											135	13	255	255	255	3315	3315
											136	9	255	255	255	2295	2295
											137	2	255	255	255	510	510
											138	1326	255	255	255	338130	338130
											139	2	255	255	255	510	510
											140	5	255	255	255	1275	1275
											141	4	255	255	255	1020	1020
											142	3490	255	255	255	889950	889950
											143	91	255	255	255	23205	23205
											144	2	255	255	255	510	510
											145	258	255	255	255	65790	65790
											146	20	255	255	255	5100	5100
											147	3	255	255	255	765	765
											148	2	255	255	255	510	510
											149	2	255	255	255	510	510
											150	16	255	255	255	4080	4080
											151	137	255	255	255	34935	34935
											152	148	255	255	255	37740	37740
											153	76	255	255	255	19380	19380
											154	4	255	255	255	1020	1020
											155	137	255	255	255	34935	34935
											156	51	255	255	255	13005	13005
											157	13	255	255	255	3315	3315
											158	3	255	255	255	765	765
											159	440	255	255	255	112200	112200
											160	819	255	255	255	208845	208845
											161	4	255	255	255	1020	1020
											162	2	255	255	255	510	510
											163	2	255	255	255	510	510
											164	199	255	255	255	50745	50745
											165	2	255	255	255	510	510
											166	3	255	255	255	765	765
											167	2	255	255	255	510	510
											168	2	255	255	255	510	510
											169	20	255	255	255	5100	5100
											170	3	255	255	255	765	765
											171	98	255	255	255	24990	24990
											172	11	255	255	255	2805	2805
											173	2	255	255	255	510	510
											174	6	255	255	255	1530	1530
											175	4483	255	255	255	1143165	1143165
											176	48	255	255	255	12240	12240
											177	2	255	255	255	510	510
											178	4	255	255	255	1020	1020
[truncated: 54 more rows]

## Sheet: 419 - summary
BFP									TF-GFP
	Count	Total Area	Ave. Size	% Area	Mean	IntDen				Count	Total Area	Ave. Size	% Area	Mean	IntDen		TF normalised to BFP	%	Average
MAX_20211015_E35_TN_1_419.lif - Series002 - C=0	120	116738	972.817	44.532	255	248068			MAX_20211015_E35_TN_1_419.lif - Series002 - C=1	427	23213	54.363	8.855	255	13862.6		0.0558821	5.58821	14.8527
MAX_20211015_E35_TN_1_419.lif - Series004 - C=0	70	78108	1115.83	29.796	255	284536			MAX_20211015_E35_TN_1_419.lif - Series004 - C=1	279	32263	115.638	12.307	255	29487.7		0.103634	10.3634
MAX_20211015_E35_TN_1_419.lif - Series006 - C=0	144	84272	585.222	32.147	255	149232			MAX_20211015_E35_TN_1_419.lif - Series006 - C=1	316	24100	76.266	9.193	255	19447.8		0.130319	13.0319
MAX_20211015_E35_TN_1_419.lif - Series008 - C=0	137	129924	948.35	49.562	255	241829			MAX_20211015_E35_TN_1_419.lif - Series008 - C=1	428	67097	156.769	25.595	255	39976		0.165307	16.5307
MAX_20211015_E35_TN_1_419.lif - Series010 - C=0	111	135973	1224.98	51.87	255	312370			MAX_20211015_E35_TN_1_419.lif - Series010 - C=1	370	45431	122.786	17.331	255	31310.6		0.100235	10.0235
MAX_20211015_E35_TN_1_419.lif - Series012 - C=0	131	65784	502.168	25.095	255	128053			MAX_20211015_E35_TN_1_419.lif - Series012 - C=1	232	39120	168.621	14.923	255	42998.3		0.335785	33.5785

## Sheet: 420
BFP										TF-GFP
Embryo		Area	Mean	Min	Max	IntDen	RawIntDen			Embryo		Area	Mean	Min	Max	IntDen	RawIntDen
	1	80463	255	255	255	20518065	20518065				1	3094	255	255	255	788970	788970
	2	134	255	255	255	34170	34170				2	143	255	255	255	36465	36465
	3	12	255	255	255	3060	3060				3	2	255	255	255	510	510
	4	3	255	255	255	765	765				4	25	255	255	255	6375	6375
	5	7	255	255	255	1785	1785				5	141	255	255	255	35955	35955
	6	9	255	255	255	2295	2295				6	107	255	255	255	27285	27285
	7	13	255	255	255	3315	3315				7	59	255	255	255	15045	15045
	8	5	255	255	255	1275	1275				8	2	255	255	255	510	510
	9	8	255	255	255	2040	2040				9	2	255	255	255	510	510
	10	2	255	255	255	510	510				10	2	255	255	255	510	510
	11	21	255	255	255	5355	5355				11	2	255	255	255	510	510
	12	2	255	255	255	510	510				12	3	255	255	255	765	765
	13	2	255	255	255	510	510				13	2	255	255	255	510	510
	14	2	255	255	255	510	510				14	3	255	255	255	765	765
	15	103	255	255	255	26265	26265				15	465	255	255	255	118575	118575
	16	6	255	255	255	1530	1530				16	2	255	255	255	510	510
	17	2	255	255	255	510	510				17	35	255	255	255	8925	8925
	18	3	255	255	255	765	765				18	2	255	255	255	510	510
	19	5	255	255	255	1275	1275				19	2	255	255	255	510	510
	20	315	255	255	255	80325	80325				20	3	255	255	255	765	765
	21	187	255	255	255	47685	47685				21	472	255	255	255	120360	120360
	22	3	255	255	255	765	765				22	2	255	255	255	510	510
	23	3	255	255	255	765	765				23	2	255	255	255	510	510
	24	2	255	255	255	510	510				24	5	255	255	255	1275	1275
	25	4	255	255	255	1020	1020				25	6	255	255	255	1530	1530
	26	3	255	255	255	765	765				26	144	255	255	255	36720	36720
	27	8	255	255	255	2040	2040				27	63	255	255	255	16065	16065
	28	12	255	255	255	3060	3060				28	3	255	255	255	765	765
	29	3	255	255	255	765	765				29	5	255	255	255	1275	1275
	30	3	255	255	255	765	765				30	7	255	255	255	1785	1785
	31	13	255	255	255	3315	3315				31	2	255	255	255	510	510
	32	3	255	255	255	765	765				32	15	255	255	255	3825	3825
	33	388	255	255	255	98940	98940				33	12	255	255	255	3060	3060
	34	5	255	255	255	1275	1275				34	7	255	255	255	1785	1785
	35	3	255	255	255	765	765				35	2	255	255	255	510	510
	36	3	255	255	255	765	765				36	2	255	255	255	510	510
	37	2	255	255	255	510	510				37	2	255	255	255	510	510
	38	5	255	255	255	1275	1275				38	21	255	255	255	5355	5355
	39	214	255	255	255	54570	54570				39	7	255	255	255	1785	1785
	40	16	255	255	255	4080	4080				40	4	255	255	255	1020	1020
	41	8	255	255	255	2040	2040				41	33	255	255	255	8415	8415
	42	2	255	255	255	510	510				42	1992	255	255	255	507960	507960
	43	9	255	255	255	2295	2295				43	6	255	255	255	1530	1530
	44	42	255	255	255	10710	10710				44	58	255	255	255	14790	14790
	45	12	255	255	255	3060	3060				45	1041	255	255	255	265455	265455
	46	2	255	255	255	510	510				46	29	255	255	255	7395	7395
	47	2	255	255	255	510	510				47	64	255	255	255	16320	16320
	48	68	255	255	255	17340	17340				48	3	255	255	255	765	765
	49	2	255	255	255	510	510				49	9	255	255	255	2295	2295
	50	321	255	255	255	81855	81855				50	53	255	255	255	13515	13515
	51	5	255	255	255	1275	1275				51	4	255	255	255	1020	1020
	52	2	255	255	255	510	510				52	3	255	255	255	765	765
	53	2	255	255	255	510	510				53	1142	255	255	255	291210	291210
	54	2	255	255	255	510	510				54	4	255	255	255	1020	1020
	55	156	255	255	255	39780	39780				55	6	255	255	255	1530	1530
	56	2	255	255	255	510	510				56	2	255	255	255	510	510
	57	6	255	255	255	1530	1530				57	3	255	255	255	765	765
	58	5	255	255	255	1275	1275				58	5	255	255	255	1275	1275
	59	2	255	255	255	510	510				59	10	255	255	255	2550	2550
	60	12	255	255	255	3060	3060				60	258	255	255	255	65790	65790
	61	2	255	255	255	510	510				61	9	255	255	255	2295	2295
	62	23	255	255	255	5865	5865				62	2	255	255	255	510	510
	63	2	255	255	255	510	510				63	2	255	255	255	510	510
	64	10	255	255	255	2550	2550				64	2	255	255	255	510	510
	65	4	255	255	255	1020	1020				65	2	255	255	255	510	510
	66	3	255	255	255	765	765				66	9	255	255	255	2295	2295
	67	52	255	255	255	13260	13260				67	2	255	255	255	510	510
	68	2	255	255	255	510	510				68	13	255	255	255	3315	3315
	69	143	255	255	255	36465	36465				69	2	255	255	255	510	510
	70	2	255	255	255	510	510				70	14	255	255	255	3570	3570
	71	2	255	255	255	510	510				71	9	255	255	255	2295	2295
	72	157	255	255	255	40035	40035				72	38	255	255	255	9690	9690
	73	9	255	255	255	2295	2295				73	2	255	255	255	510	510
	74	2	255	255	255	510	510				74	2	255	255	255	510	510
	75	43	255	255	255	10965	10965				75	73	255	255	255	18615	18615
	76	3	255	255	255	765	765				76	5	255	255	255	1275	1275
	77	213	255	255	255	54315	54315				77	21	255	255	255	5355	5355
	78	2	255	255	255	510	510				78	5	255	255	255	1275	1275
	79	2	255	255	255	510	510				79	8	255	255	255	2040	2040
	80	5	255	255	255	1275	1275				80	2	255	255	255	510	510
	81	21	255	255	255	5355	5355				81	4	255	255	255	1020	1020
	82	12	255	255	255	3060	3060				82	11	255	255	255	2805	2805
	83	41	255	255	255	10455	10455				83	4	255	255	255	1020	1020
	84	2	255	255	255	510	510				84	6	255	255	255	1530	1530
	85	3	255	255	255	765	765				85	162	255	255	255	41310	41310
	86	4	255	255	255	1020	1020				86	3	255	255	255	765	765
	87	191	255	255	255	48705	48705				87	66	255	255	255	16830	16830
	88	2	255	255	255	510	510				88	27	255	255	255	6885	6885
	89	5	255	255	255	1275	1275				89	2	255	255	255	510	510
	90	7	255	255	255	1785	1785				90	4	255	255	255	1020	1020
	91	2	255	255	255	510	510				91	84	255	255	255	21420	21420
	92	2	255	255	255	510	510				92	4	255	255	255	1020	1020
	93	2	255	255	255	510	510				93	2	255	255	255	510	510
	94	10	255	255	255	2550	2550				94	77	255	255	255	19635	19635
	95	2	255	255	255	510	510				95	21	255	255	255	5355	5355
	96	2	255	255	255	510	510				96	3	255	255	255	765	765
	97	3	255	255	255	765	765				97	2	255	255	255	510	510
	98	2	255	255	255	510	510				98	164	255	255	255	41820	41820
	99	2	255	255	255	510	510				99	350	255	255	255	89250	89250
	100	2	255	255	255	510	510				100	5	255	255	255	1275	1275
	101	2	255	255	255	510	510				101	2	255	255	255	510	510
	102	2	255	255	255	510	510				102	5	255	255	255	1275	1275
	103	14	255	255	255	3570	3570				103	4	255	255	255	1020	1020
	104	13	255	255	255	3315	3315				104	2	255	255	255	510	510
	105	5	255	255	255	1275	1275				105	110	255	255	255	28050	28050
	106	2	255	255	255	510	510				106	93	255	255	255	23715	23715
	107	7	255	255	255	1785	1785				107	60	255	255	255	15300	15300
	108	7	255	255	255	1785	1785				108	66	255	255	255	16830	16830
	109	3	255	255	255	765	765				109	3	255	255	255	765	765
	110	4	255	255	255	1020	1020				110	2	255	255	255	510	510
	111	7	255	255	255	1785	1785				111	327	255	255	255	83385	83385
	112	2	255	255	255	510	510				112	2	255	255	255	510	510
	113	3	255	255	255	765	765				113	2	255	255	255	510	510
	114	7	255	255	255	1785	1785				114	19	255	255	255	4845	4845
	115	3	255	255	255	765	765				115	135	255	255	255	34425	34425
	116	3	255	255	255	765	765				116	146	255	255	255	37230	37230
	117	14	255	255	255	3570	3570				117	62	255	255	255	15810	15810
	118	3	255	255	255	765	765				118	171	255	255	255	43605	43605
	119	2	255	255	255	510	510				119	175	255	255	255	44625	44625
	120	40	255	255	255	10200	10200				120	3	255	255	255	765	765
	121	2	255	255	255	510	510				121	113	255	255	255	28815	28815
	122	5	255	255	255	1275	1275				122	18	255	255	255	4590	4590
	123	6	255	255	255	1530	1530				123	2	255	255	255	510	510
	124	24	255	255	255	6120	6120				124	43	255	255	255	10965	10965
	125	10	255	255	255	2550	2550				125	9	255	255	255	2295	2295
	126	10	255	255	255	2550	2550				126	54	255	255	255	13770	13770
	127	2	255	255	255	510	510				127	25	255	255	255	6375	6375
	128	4	255	255	255	1020	1020				128	16	255	255	255	4080	4080
	129	14	255	255	255	3570	3570				129	2	255	255	255	510	510
	130	8	255	255	255	2040	2040				130	7	255	255	255	1785	1785
	131	8	255	255	255	2040	2040				131	5	255	255	255	1275	1275
	132	6	255	255	255	1530	1530				132	236	255	255	255	60180	60180
	133	3	255	255	255	765	765				133	2	255	255	255	510	510
	134	10	255	255	255	2550	2550				134	91	255	255	255	23205	23205
	135	4	255	255	255	1020	1020				135	3	255	255	255	765	765
	136	2	255	255	255	510	510				136	130	255	255	255	33150	33150
	137	2	255	255	255	510	510				137	301	255	255	255	76755	76755
	138	6	255	255	255	1530	1530				138	30	255	255	255	7650	7650
	139	4	255	255	255	1020	1020				139	2	255	255	255	510	510
	140	2	255	255	255	510	510				140	2	255	255	255	510	510
	141	125	255	255	255	31875	31875				141	93	255	255	255	23715	23715
	142	3	255	255	255	765	765				142	6	255	255	255	1530	1530
	143	2	255	255	255	510	510				143	85	255	255	255	21675	21675
	144	6	255	255	255	1530	1530				144	2	255	255	255	510	510
	145	7	255	255	255	1785	1785				145	2	255	255	255	510	510
	146	72	255	255	255	18360	18360				146	128	255	255	255	32640	32640
	147	2	255	255	255	510	510				147	2	255	255	255	510	510
	148	23	255	255	255	5865	5865				148	2	255	255	255	510	510
	149	3	255	255	255	765	765				149	4	255	255	255	1020	1020
	150	2	255	255	255	510	510				150	4	255	255	255	1020	1020
	151	3	255	255	255	765	765				151	55	255	255	255	14025	14025
	152	15	255	255	255	3825	3825				152	2	255	255	255	510	510
	153	3	255	255	255	765	765				153	154	255	255	255	39270	39270
	154	6	255	255	255	1530	1530				154	285	255	255	255	72675	72675
	155	6	255	255	255	1530	1530				155	245	255	255	255	62475	62475
	156	2	255	255	255	510	510				156	6	255	255	255	1530	1530
	157	2	255	255	255	510	510				157	4	255	255	255	1020	1020
	158	15	255	255	255	3825	3825				158	225	255	255	255	57375	57375
	159	3	255	255	255	765	765				159	85	255	255	255	21675	21675
	160	3	255	255	255	765	765				160	3	255	255	255	765	765
	161	2	255	255	255	510	510				161	44	255	255	255	11220	11220
	162	2	255	255	255	510	510				162	2	255	255	255	510	510
	163	23	255	255	255	5865	5865				163	134	255	255	255	34170	34170
	164	2	255	255	255	510	510				164	86	255	255	255	21930	21930
	165	22	255	255	255	5610	5610				165	3	255	255	255	765	765
	166	70	255	255	255	17850	17850				166	2	255	255	255	510	510
	167	2	255	255	255	510	510				167	7	255	255	255	1785	1785
	168	2	255	255	255	510	510				168	445	255	255	255	113475	113475
	169	4	255	255	255	1020	1020				169	30	255	255	255	7650	7650
	170	25	255	255	255	6375	6375				170	5	255	255	255	1275	1275
	171	8	255	255	255	2040	2040				171	255	255	255	255	65025	65025
	172	8	255	255	255	2040	2040				172	622	255	255	255	158610	158610
	173	2	255	255	255	510	510				173	8	255	255	255	2040	2040
	174	6	255	255	255	1530	1530				174	2	255	255	255	510	510
	175	3	255	255	255	765	765				175	2	255	255	255	510	510
	176	19	255	255	255	4845	4845				176	216	255	255	255	55080	55080
	177	42	255	255	255	10710	10710				177	376	255	255	255	95880	95880
	178	6	255	255	255	1530	1530				178	2	255	255	255	510	510
	179	2	255	255	255	510	510				179	5	255	255	255	1275	1275
	180	2	255	255	255	510	510				180	12	255	255	255	3060	3060
	181	2	255	255	255	510	510				181	2	255	255	255	510	510
	182	5	255	255	255	1275	1275				182	3	255	255	255	765	765
	183	134	255	255	255	34170	34170				183	12	255	255	255	3060	3060
	184	3	255	255	255	765	765				184	2	255	255	255	510	510
	185	2	255	255	255	510	510				185	389	255	255	255	99195	99195
	186	72	255	255	255	18360	18360				186	4	255	255	255	1020	1020
	187	236	255	255	255	60180	60180				187	2	255	255	255	510	510
	188	11	255	255	255	2805	2805				188	2	255	255	255	510	510
	189	6	255	255	255	1530	1530				189	3	255	255	255	765	765
	190	2	255	255	255	510	510				190	113	255	255	255	28815	28815
	191	4	255	255	255	1020	1020				191	2	255	255	255	510	510
	192	2	255	255	255	510	510				192	14	255	255	255	3570	3570
	193	10	255	255	255	2550	2550				193	2	255	255	255	510	510
	194	4	255	255	255	1020	1020				194	3	255	255	255	765	765
	195	4	255	255	255	1020	1020				195	4	255	255	255	1020	1020
	196	8	255	255	255	2040	2040				196	2	255	255	255	510	510
	197	211	255	255	255	53805	53805				197	2	255	255	255	510	510
	198	30	255	255	255	7650	7650				198	3	255	255	255	765	765
	199	23	255	255	255	5865	5865				199	10	255	255	255	2550	2550
	200	6	255	255	255	1530	1530				200	2	255	255	255	510	510
	201	8	255	255	255	2040	2040				201	4	255	255	255	1020	1020
	202	3	255	255	255	765	765				202	6	255	255	255	1530	1530
	203	4	255	255	255	1020	1020				203	43	255	255	255	10965	10965
	204	4	255	255	255	1020	1020				204	1640	255	255	255	418200	418200
	205	6	255	255	255	1530	1530				205	2	255	255	255	510	510
	206	2	255	255	255	510	510				206	2	255	255	255	510	510
	207	2	255	255	255	510	510				207	9	255	255	255	2295	2295
	208	458	255	255	255	116790	116790				208	2	255	255	255	510	510
	209	133	255	255	255	33915	33915				209	171	255	255	255	43605	43605
	210	3	255	255	255	765	765				210	2	255	255	255	510	510
	211	4	255	255	255	1020	1020				211	3	255	255	255	765	765
	212	22	255	255	255	5610	5610				212	104	255	255	255	26520	26520
	213	5	255	255	255	1275	1275				213	15	255	255	255	3825	3825
	214	42	255	255	255	10710	10710				214	29	255	255	255	7395	7395
	215	5	255	255	255	1275	1275				215	90	255	255	255	22950	22950
	216	2	255	255	255	510	510				216	2	255	255	255	510	510
	217	7	255	255	255	1785	1785				217	2	255	255	255	510	510
	218	14	255	255	255	3570	3570				218	5	255	255	255	1275	1275
	219	2	255	255	255	510	510				219	2	255	255	255	510	510
	220	39	255	255	255	9945	9945				220	3	255	255	255	765	765
	221	2	255	255	255	510	510				221	104	255	255	255	26520	26520
	222	127	255	255	255	32385	32385				222	2	255	255	255	510	510
	223	3	255	255	255	765	765				223	5	255	255	255	1275	1275
	224	2	255	255	255	510	510				224	73	255	255	255	18615	18615
	225	82	255	255	255	20910	20910				225	71	255	255	255	18105	18105
	226	7	255	255	255	1785	1785				226	2	255	255	255	510	510
	227	2	255	255	255	510	510				227	10	255	255	255	2550	2550
	228	2	255	255	255	510	510				228	2	255	255	255	510	510
	229	286	255	255	255	72930	72930				229	4	255	255	255	1020	1020
	230	2	255	255	255	510	510				230	76	255	255	255	19380	19380
	231	43	255	255	255	10965	10965				231	2	255	255	255	510	510
	232	248	255	255	255	63240	63240				232	3	255	255	255	765	765
	233	13	255	255	255	3315	3315				233	3	255	255	255	765	765
	234	30	255	255	255	7650	7650				234	10	255	255	255	2550	2550
	235	3	255	255	255	765	765				235	85	255	255	255	21675	21675
	236	2	255	255	255	510	510				236	47	255	255	255	11985	11985
	237	29	255	255	255	7395	7395				237	2	255	255	255	510	510
	1	71852	255	255	255	18322260	18322260				238	903	255	255	255	230265	230265
	2	2	255	255	255	510	510				239	212	255	255	255	54060	54060
	3	2	255	255	255	510	510				240	2	255	255	255	510	510
	4	15	255	255	255	3825	3825				241	2	255	255	255	510	510
	5	3	255	255	255	765	765				242	2	255	255	255	510	510
	6	355	255	255	255	90525	90525				243	34	255	255	255	8670	8670
	7	109	255	255	255	27795	27795				244	2	255	255	255	510	510
	8	6	255	255	255	1530	1530				245	4	255	255	255	1020	1020
	9	3	255	255	255	765	765				246	97	255	255	255	24735	24735
	10	2	255	255	255	510	510				247	153	255	255	255	39015	39015
	11	14	255	255	255	3570	3570				248	12	255	255	255	3060	3060
	12	2	255	255	255	510	510				249	3	255	255	255	765	765
	13	3	255	255	255	765	765				250	883	255	255	255	225165	225165
	14	4	255	255	255	1020	1020				251	10	255	255	255	2550	2550
	15	2	255	255	255	510	510				252	5	255	255	255	1275	1275
	16	232	255	255	255	59160	59160				253	7	255	255	255	1785	1785
	17	7	255	255	255	1785	1785				254	5	255	255	255	1275	1275
	18	6	255	255	255	1530	1530				255	3	255	255	255	765	765
	19	3	255	255	255	765	765				256	180	255	255	255	45900	45900
	20	4	255	255	255	1020	1020				257	7	255	255	255	1785	1785
	21	2	255	255	255	510	510				258	3	255	255	255	765	765
	22	2	255	255	255	510	510				259	41	255	255	255	10455	10455
	23	4	255	255	255	1020	1020				260	107	255	255	255	27285	27285
	24	16	255	255	255	4080	4080				261	7	255	255	255	1785	1785
	25	13	255	255	255	3315	3315				262	2	255	255	255	510	510
	26	8	255	255	255	2040	2040				263	2	255	255	255	510	510
	27	46	255	255	255	11730	11730				264	47	255	255	255	11985	11985
	28	182	255	255	255	46410	46410				265	33	255	255	255	8415	8415
	29	129	255	255	255	32895	32895				266	2	255	255	255	510	510
	30	28	255	255	255	7140	7140				267	3	255	255	255	765	765
	31	2	255	255	255	510	510				268	2	255	255	255	510	510
	32	2	255	255	255	510	510				269	30	255	255	255	7650	7650
	33	6	255	255	255	1530	1530				270	6	255	255	255	1530	1530
	34	2	255	255	255	510	510				271	330	255	255	255	84150	84150
	35	52	255	255	255	13260	13260				272	102	255	255	255	26010	26010
	36	9	255	255	255	2295	2295				273	3	255	255	255	765	765
	37	163	255	255	255	41565	41565				274	26	255	255	255	6630	6630
	38	7	255	255	255	1785	1785				275	19	255	255	255	4845	4845
	39	14	255	255	255	3570	3570				276	3	255	255	255	765	765
	40	45	255	255	255	11475	11475				277	2	255	255	255	510	510
	41	3	255	255	255	765	765				278	60	255	255	255	15300	15300
	42	130	255	255	255	33150	33150				279	2	255	255	255	510	510
	43	5	255	255	255	1275	1275				280	94	255	255	255	23970	23970
	44	6	255	255	255	1530	1530				281	37	255	255	255	9435	9435
	45	62	255	255	255	15810	15810				282	2	255	255	255	510	510
	46	341	255	255	255	86955	86955				283	51	255	255	255	13005	13005
	47	28	255	255	255	7140	7140				284	2	255	255	255	510	510
	48	4	255	255	255	1020	1020				285	14	255	255	255	3570	3570
	49	59	255	255	255	15045	15045				286	40	255	255	255	10200	10200
	50	2	255	255	255	510	510				287	40	255	255	255	10200	10200
	51	24	255	255	255	6120	6120				288	3	255	255	255	765	765
	52	108	255	255	255	27540	27540				289	154	255	255	255	39270	39270
	53	3	255	255	255	765	765				290	2	255	255	255	510	510
	54	3	255	255	255	765	765				291	36	255	255	255	9180	9180
	55	2	255	255	255	510	510				292	2	255	255	255	510	510
	56	9	255	255	255	2295	2295				293	243	255	255	255	61965	61965
	57	6	255	255	255	1530	1530				294	65	255	255	255	16575	16575
	58	2	255	255	255	510	510				295	2	255	255	255	510	510
	59	130	255	255	255	33150	33150				296	192	255	255	255	48960	48960
	60	222	255	255	255	56610	56610				297	73	255	255	255	18615	18615
	61	3	255	255	255	765	765				298	2	255	255	255	510	510
	62	3	255	255	255	765	765				299	4	255	255	255	1020	1020
	63	5	255	255	255	1275	1275				300	37	255	255	255	9435	9435
	64	65	255	255	255	16575	16575				301	105	255	255	255	26775	26775
	65	47	255	255	255	11985	11985				302	41	255	255	255	10455	10455
	66	7	255	255	255	1785	1785				303	2	255	255	255	510	510
	67	2	255	255	255	510	510				304	14	255	255	255	3570	3570
	68	11	255	255	255	2805	2805				305	2	255	255	255	510	510
	69	47	255	255	255	11985	11985				306	2	255	255	255	510	510
	70	3	255	255	255	765	765				307	23	255	255	255	5865	5865
	71	79	255	255	255	20145	20145				308	2	255	255	255	510	510
	72	99	255	255	255	25245	25245				309	87	255	255	255	22185	22185
	73	77	255	255	255	19635	19635				310	9	255	255	255	2295	2295
	74	2	255	255	255	510	510				311	14	255	255	255	3570	3570
	75	171	255	255	255	43605	43605				312	120	255	255	255	30600	30600
	76	148	255	255	255	37740	37740				313	5	255	255	255	1275	1275
	77	6	255	255	255	1530	1530				314	2	255	255	255	510	510
	78	1381	255	255	255	352155	352155				315	166	255	255	255	42330	42330
	79	180	255	255	255	45900	45900				316	3	255	255	255	765	765
	80	44	255	255	255	11220	11220				317	2	255	255	255	510	510
	81	97	255	255	255	24735	24735				318	32	255	255	255	8160	8160
	82	313	255	255	255	79815	79815				319	2	255	255	255	510	510
	83	3	255	255	255	765	765				320	4	255	255	255	1020	1020
	84	2	255	255	255	510	510				321	81	255	255	255	20655	20655
	85	185	255	255	255	47175	47175				322	34	255	255	255	8670	8670
	86	157	255	255	255	40035	40035				323	2	255	255	255	510	510
	87	5	255	255	255	1275	1275				324	2	255	255	255	510	510
	88	4	255	255	255	1020	1020				325	6	255	255	255	1530	1530
	89	3	255	255	255	765	765				326	6	255	255	255	1530	1530
	90	263	255	255	255	67065	67065				327	2	255	255	255	510	510
	91	14	255	255	255	3570	3570				1	21664	255	255	255	5524320	5524320
	92	62	255	255	255	15810	15810				2	158	255	255	255	40290	40290
	93	72	255	255	255	18360	18360				3	27	255	255	255	6885	6885
	94	64	255	255	255	16320	16320				4	2	255	255	255	510	510
	95	2	255	255	255	510	510				5	2	255	255	255	510	510
	96	13	255	255	255	3315	3315				6	102	255	255	255	26010	26010
	97	3	255	255	255	765	765				7	5	255	255	255	1275	1275
	98	366	255	255	255	93330	93330				8	114	255	255	255	29070	29070
	99	236	255	255	255	60180	60180				9	20	255	255	255	5100	5100
	100	2	255	255	255	510	510				10	2	255	255	255	510	510
	101	101	255	255	255	25755	25755				11	2	255	255	255	510	510
	102	3	255	255	255	765	765				12	2	255	255	255	510	510
	103	3	255	255	255	765	765				13	2	255	255	255	510	510
	104	21	255	255	255	5355	5355				14	9	255	255	255	2295	2295
	105	9	255	255	255	2295	2295				15	47	255	255	255	11985	11985
	106	4	255	255	255	1020	1020				16	2	255	255	255	510	510
	107	27	255	255	255	6885	6885				17	66	255	255	255	16830	16830
	108	5259	255	255	255	1341045	1341045				18	4	255	255	255	1020	1020
	109	2	255	255	255	510	510				19	132	255	255	255	33660	33660
	110	2	255	255	255	510	510				20	4	255	255	255	1020	1020
	111	4	255	255	255	1020	1020				21	2	255	255	255	510	510
	112	159	255	255	255	40545	40545				22	5	255	255	255	1275	1275
	113	8	255	255	255	2040	2040				23	2	255	255	255	510	510
	114	2	255	255	255	510	510				24	20	255	255	255	5100	5100
	115	98	255	255	255	24990	24990				25	66	255	255	255	16830	16830
	116	6	255	255	255	1530	1530				26	43	255	255	255	10965	10965
	117	5	255	255	255	1275	1275				27	2	255	255	255	510	510
	118	4	255	255	255	1020	1020				28	15	255	255	255	3825	3825
	119	2	255	255	255	510	510				29	6	255	255	255	1530	1530
	120	7	255	255	255	1785	1785				30	2	255	255	255	510	510
	121	2	255	255	255	510	510				31	4	255	255	255	1020	1020
	122	2	255	255	255	510	510				32	2	255	255	255	510	510
	123	317	255	255	255	80835	80835				33	3	255	255	255	765	765
	124	2	255	255	255	510	510				34	772	255	255	255	196860	196860
	125	225	255	255	255	57375	57375				35	30	255	255	255	7650	7650
	126	3	255	255	255	765	765				36	2	255	255	255	510	510
	127	16	255	255	255	4080	4080				37	28	255	255	255	7140	7140
	128	3	255	255	255	765	765				38	59	255	255	255	15045	15045
	129	25	255	255	255	6375	6375				39	3	255	255	255	765	765
	130	19	255	255	255	4845	4845				40	22	255	255	255	5610	5610
	131	7	255	255	255	1785	1785				41	2	255	255	255	510	510
	1	119702	255	255	255	30524010	30524010				42	21	255	255	255	5355	5355
	2	19	255	255	255	4845	4845				43	13	255	255	255	3315	3315
	3	2	255	255	255	510	510				44	4	255	255	255	1020	1020
	4	2	255	255	255	510	510				45	3	255	255	255	765	765
	5	52	255	255	255	13260	13260				46	4	255	255	255	1020	1020
	6	2	255	255	255	510	510				47	2	255	255	255	510	510
	7	14	255	255	255	3570	3570				48	3	255	255	255	765	765
	8	16	255	255	255	4080	4080				49	54	255	255	255	13770	13770
	9	3	255	255	255	765	765				50	176	255	255	255	44880	44880
	10	463	255	255	255	118065	118065				51	2	255	255	255	510	510
	11	9	255	255	255	2295	2295				52	2	255	255	255	510	510
	12	10	255	255	255	2550	2550				53	39	255	255	255	9945	9945
	13	2	255	255	255	510	510				54	3	255	255	255	765	765
	14	519	255	255	255	132345	132345				55	2	255	255	255	510	510
	15	19	255	255	255	4845	4845				56	6	255	255	255	1530	1530
	16	846	255	255	255	215730	215730				57	4	255	255	255	1020	1020
	17	2	255	255	255	510	510				58	946	255	255	255	241230	241230
	18	188	255	255	255	47940	47940				59	2	255	255	255	510	510
	19	2	255	255	255	510	510				60	3	255	255	255	765	765
	20	202	255	255	255	51510	51510				61	3	255	255	255	765	765
	21	3	255	255	255	765	765				62	19	255	255	255	4845	4845
	22	2	255	255	255	510	510				63	2	255	255	255	510	510
	23	18	255	255	255	4590	4590				64	51	255	255	255	13005	13005
	24	3	255	255	255	765	765				65	170	255	255	255	43350	43350
	25	2	255	255	255	510	510				66	2	255	255	255	510	510
	26	4	255	255	255	1020	1020				67	4	255	255	255	1020	1020
	27	143	255	255	255	36465	36465				68	15	255	255	255	3825	3825
	28	608	255	255	255	155040	155040				69	142	255	255	255	36210	36210
	29	137	255	255	255	34935	34935				70	54	255	255	255	13770	13770
	30	183	255	255	255	46665	46665				71	3	255	255	255	765	765
	31	2	255	255	255	510	510				72	2	255	255	255	510	510
	32	13	255	255	255	3315	3315				73	2	255	255	255	510	510
	33	2	255	255	255	510	510				74	3	255	255	255	765	765
	34	4	255	255	255	1020	1020				75	83	255	255	255	21165	21165
	35	4	255	255	255	1020	1020				76	2	255	255	255	510	510
	36	4	255	255	255	1020	1020				77	2	255	255	255	510	510
	37	80	255	255	255	20400	20400				78	3	255	255	255	765	765
	38	4	255	255	255	1020	1020				79	3	255	255	255	765	765
	39	3	255	255	255	765	765				80	4	255	255	255	1020	1020
	40	3	255	255	255	765	765				81	2	255	255	255	510	510
	41	2	255	255	255	510	510				82	3	255	255	255	765	765
	42	3	255	255	255	765	765				83	8	255	255	255	2040	2040
	43	3	255	255	255	765	765				84	95	255	255	255	24225	24225
	44	2	255	255	255	510	510				85	2	255	255	255	510	510
	45	176	255	255	255	44880	44880				86	2	255	255	255	510	510
	46	11	255	255	255	2805	2805				87	4	255	255	255	1020	1020
	47	4	255	255	255	1020	1020				88	8	255	255	255	2040	2040
	48	4	255	255	255	1020	1020				89	6	255	255	255	1530	1530
	49	27	255	255	255	6885	6885				90	2	255	255	255	510	510
	50	141	255	255	255	35955	35955				91	2	255	255	255	510	510
	51	2	255	255	255	510	510				92	15	255	255	255	3825	3825
	52	14	255	255	255	3570	3570				93	2	255	255	255	510	510
	53	6	255	255	255	1530	1530				94	4	255	255	255	1020	1020
	54	4	255	255	255	1020	1020				95	5	255	255	255	1275	1275
	55	2	255	255	255	510	510				96	2	255	255	255	510	510
	56	2	255	255	255	510	510				97	3	255	255	255	765	765
	57	4	255	255	255	1020	1020				98	2	255	255	255	510	510
	58	2	255	255	255	510	510				99	3	255	255	255	765	765
	59	2	255	255	255	510	510				100	3	255	255	255	765	765
	60	3	255	255	255	765	765				101	2	255	255	255	510	510
	61	8	255	255	255	2040	2040				102	2	255	255	255	510	510
	62	9	255	255	255	2295	2295				103	2	255	255	255	510	510
	63	19	255	255	255	4845	4845				104	2	255	255	255	510	510
	64	4	255	255	255	1020	1020				105	2	255	255	255	510	510
	65	2	255	255	255	510	510				106	3	255	255	255	765	765
	66	5	255	255	255	1275	1275				107	17	255	255	255	4335	4335
	67	3	255	255	255	765	765				108	99	255	255	255	25245	25245
	68	2	255	255	255	510	510				109	2	255	255	255	510	510
	69	7	255	255	255	1785	1785				110	3	255	255	255	765	765
	70	2	255	255	255	510	510				111	2	255	255	255	510	510
	71	60	255	255	255	15300	15300				112	3	255	255	255	765	765
	72	2	255	255	255	510	510				113	2	255	255	255	510	510
	73	2	255	255	255	510	510				114	2	255	255	255	510	510
	74	22	255	255	255	5610	5610				115	2	255	255	255	510	510
	75	2	255	255	255	510	510				116	8	255	255	255	2040	2040
	76	6	255	255	255	1530	1530				117	22	255	255	255	5610	5610
	77	464	255	255	255	118320	118320				118	2	255	255	255	510	510
	78	2	255	255	255	510	510				119	2	255	255	255	510	510
	79	2	255	255	255	510	510				120	2	255	255	255	510	510
	80	4	255	255	255	1020	1020				121	2	255	255	255	510	510
	81	3	255	255	255	765	765				122	40	255	255	255	10200	10200
	82	6	255	255	255	1530	1530				123	2	255	255	255	510	510
	83	170	255	255	255	43350	43350				124	13	255	255	255	3315	3315
	84	5	255	255	255	1275	1275				125	2	255	255	255	510	510
	85	12	255	255	255	3060	3060				126	3	255	255	255	765	765
	1	103011	255	255	255	26267805	26267805				127	2	255	255	255	510	510
	2	2	255	255	255	510	510				128	8	255	255	255	2040	2040
	3	262	255	255	255	66810	66810				129	3	255	255	255	765	765
	4	19	255	255	255	4845	4845				130	9	255	255	255	2295	2295
	5	5	255	255	255	1275	1275				131	108	255	255	255	27540	27540
	6	303	255	255	255	77265	77265				132	4	255	255	255	1020	1020
	7	27	255	255	255	6885	6885				133	2	255	255	255	510	510
	8	173	255	255	255	44115	44115				134	3	255	255	255	765	765
	9	21	255	255	255	5355	5355				135	3	255	255	255	765	765
	10	9	255	255	255	2295	2295				136	4	255	255	255	1020	1020
	11	44	255	255	255	11220	11220				137	145	255	255	255	36975	36975
	12	2	255	255	255	510	510				138	2	255	255	255	510	510
	13	5	255	255	255	1275	1275				139	3	255	255	255	765	765
	14	107	255	255	255	27285	27285				140	45	255	255	255	11475	11475
	15	2	255	255	255	510	510				141	15	255	255	255	3825	3825
	16	72	255	255	255	18360	18360				142	2	255	255	255	510	510
	17	26	255	255	255	6630	6630				143	2	255	255	255	510	510
	18	123	255	255	255	31365	31365				144	2	255	255	255	510	510
	19	2	255	255	255	510	510				145	2	255	255	255	510	510
	20	9	255	255	255	2295	2295				146	2	255	255	255	510	510
	21	2	255	255	255	510	510				147	3	255	255	255	765	765
	22	57	255	255	255	14535	14535				148	2	255	255	255	510	510
	23	2	255	255	255	510	510				149	2	255	255	255	510	510
	24	2	255	255	255	510	510				150	297	255	255	255	75735	75735
	25	3	255	255	255	765	765				151	2	255	255	255	510	510
	26	119	255	255	255	30345	30345				152	204	255	255	255	52020	52020
	27	67	255	255	255	17085	17085				153	79	255	255	255	20145	20145
	28	4	255	255	255	1020	1020				154	2	255	255	255	510	510
	29	456	255	255	255	116280	116280				155	72	255	255	255	18360	18360
	30	23	255	255	255	5865	5865				156	3	255	255	255	765	765
	31	57	255	255	255	14535	14535				157	2	255	255	255	510	510
	32	2	255	255	255	510	510				158	8	255	255	255	2040	2040
	33	5	255	255	255	1275	1275				159	8	255	255	255	2040	2040
	34	3	255	255	255	765	765				160	498	255	255	255	126990	126990
	35	10	255	255	255	2550	2550				161	2	255	255	255	510	510
	36	23	255	255	255	5865	5865				162	2	255	255	255	510	510
	37	34	255	255	255	8670	8670				163	2	255	255	255	510	510
	38	4	255	255	255	1020	1020				164	183	255	255	255	46665	46665
	39	7	255	255	255	1785	1785				165	3	255	255	255	765	765
	40	7	255	255	255	1785	1785				166	34	255	255	255	8670	8670
	41	137	255	255	255	34935	34935				167	2	255	255	255	510	510
	42	2	255	255	255	510	510				168	5	255	255	255	1275	1275
	43	42	255	255	255	10710	10710				169	2	255	255	255	510	510
	44	21	255	255	255	5355	5355				170	2	255	255	255	510	510
	45	24	255	255	255	6120	6120				171	2	255	255	255	510	510
	46	4	255	255	255	1020	1020				172	41	255	255	255	10455	10455
	47	2	255	255	255	510	510				173	7	255	255	255	1785	1785
	48	2	255	255	255	510	510				174	2	255	255	255	510	510
	49	3	255	255	255	765	765				175	2	255	255	255	510	510
	50	2	255	255	255	510	510				176	4	255	255	255	1020	1020
	51	3	255	255	255	765	765				177	10	255	255	255	2550	2550
	52	21	255	255	255	5355	5355				178	3	255	255	255	765	765
	53	2	255	255	255	510	510				179	2	255	255	255	510	510
	54	86	255	255	255	21930	21930				180	2	255	255	255	510	510
	55	2	255	255	255	510	510				181	60	255	255	255	15300	15300
	56	81	255	255	255	20655	20655				182	7	255	255	255	1785	1785
	57	540	255	255	255	137700	137700				183	211	255	255	255	53805	53805
	58	5	255	255	255	1275	1275				184	126	255	255	255	32130	32130
	59	4	255	255	255	1020	1020				185	135	255	255	255	34425	34425
	60	203	255	255	255	51765	51765				186	3	255	255	255	765	765
	61	3	255	255	255	765	765				187	3	255	255	255	765	765
	62	69	255	255	255	17595	17595				188	2	255	255	255	510	510
	63	21	255	255	255	5355	5355				189	14	255	255	255	3570	3570
	64	12	255	255	255	3060	3060				190	2	255	255	255	510	510
	65	5	255	255	255	1275	1275				191	2	255	255	255	510	510
	66	341	255	255	255	86955	86955				192	4	255	255	255	1020	1020
	67	137	255	255	255	34935	34935				193	3	255	255	255	765	765
	68	2	255	255	255	510	510				194	7	255	255	255	1785	1785
	69	3	255	255	255	765	765				195	4	255	255	255	1020	1020
	70	3	255	255	255	765	765				196	130	255	255	255	33150	33150
	71	2	255	255	255	510	510				197	67	255	255	255	17085	17085
	72	141	255	255	255	35955	35955				198	2	255	255	255	510	510
	73	261	255	255	255	66555	66555				199	73	255	255	255	18615	18615
	74	2	255	255	255	510	510				200	2	255	255	255	510	510
	75	5	255	255	255	1275	1275				201	2	255	255	255	510	510
	76	20	255	255	255	5100	5100				202	24	255	255	255	6120	6120
	77	4	255	255	255	1020	1020				203	2	255	255	255	510	510
	78	213	255	255	255	54315	54315				204	12	255	255	255	3060	3060
	79	2	255	255	255	510	510				205	2	255	255	255	510	510
	80	239	255	255	255	60945	60945				206	2	255	255	255	510	510
	81	20	255	255	255	5100	5100				207	119	255	255	255	30345	30345
	82	5	255	255	255	1275	1275				208	2	255	255	255	510	510
	83	43	255	255	255	10965	10965				209	56	255	255	255	14280	14280
	84	2	255	255	255	510	510				210	11	255	255	255	2805	2805
	85	226	255	255	255	57630	57630				211	147	255	255	255	37485	37485
	86	3	255	255	255	765	765				212	83	255	255	255	21165	21165
	87	142	255	255	255	36210	36210				213	104	255	255	255	26520	26520
	88	2	255	255	255	510	510				214	3	255	255	255	765	765
	89	4	255	255	255	1020	1020				215	7	255	255	255	1785	1785
	90	5	255	255	255	1275	1275				216	58	255	255	255	14790	14790
	91	61	255	255	255	15555	15555				217	2	255	255	255	510	510
	92	169	255	255	255	43095	43095				218	11679	255	255	255	2978145	2978145
	93	195	255	255	255	49725	49725				219	3	255	255	255	765	765
	94	6	255	255	255	1530	1530				220	158	255	255	255	40290	40290
	95	2	255	255	255	510	510				221	5	255	255	255	1275	1275
	96	33	255	255	255	8415	8415				222	3	255	255	255	765	765
	97	230	255	255	255	58650	58650				223	2	255	255	255	510	510
	98	2	255	255	255	510	510				224	15	255	255	255	3825	3825
	99	252	255	255	255	64260	64260				225	3	255	255	255	765	765
	100	31	255	255	255	7905	7905				226	2	255	255	255	510	510
	101	85	255	255	255	21675	21675				227	3	255	255	255	765	765
	102	6	255	255	255	1530	1530				228	37	255	255	255	9435	9435
	103	2	255	255	255	510	510				229	7	255	255	255	1785	1785
	104	126	255	255	255	32130	32130				230	2	255	255	255	510	510
	105	2	255	255	255	510	510				231	10	255	255	255	2550	2550
	106	8	255	255	255	2040	2040				232	447	255	255	255	113985	113985
	107	52	255	255	255	13260	13260				233	2	255	255	255	510	510
	108	34	255	255	255	8670	8670				234	2	255	255	255	510	510
	109	9	255	255	255	2295	2295				235	3	255	255	255	765	765
	110	8	255	255	255	2040	2040				236	66	255	255	255	16830	16830
	111	2	255	255	255	510	510				237	3	255	255	255	765	765
	112	297	255	255	255	75735	75735				238	2	255	255	255	510	510
	113	178	255	255	255	45390	45390				239	80	255	255	255	20400	20400
	114	6	255	255	255	1530	1530				240	49	255	255	255	12495	12495
	1	104428	255	255	255	26629140	26629140				241	94	255	255	255	23970	23970
	2	3	255	255	255	765	765				242	2	255	255	255	510	510
	3	77	255	255	255	19635	19635				243	3	255	255	255	765	765
	4	61	255	255	255	15555	15555				244	111	255	255	255	28305	28305
	5	4	255	255	255	1020	1020				245	2	255	255	255	510	510
	6	135	255	255	255	34425	34425				246	73	255	255	255	18615	18615
	7	2	255	255	255	510	510				247	2	255	255	255	510	510
	8	3	255	255	255	765	765				248	225	255	255	255	57375	57375
	9	101	255	255	255	25755	25755				249	127	255	255	255	32385	32385
	10	2	255	255	255	510	510				250	2	255	255	255	510	510
	11	79	255	255	255	20145	20145				251	2	255	255	255	510	510
	12	2	255	255	255	510	510				252	2	255	255	255	510	510
	13	12	255	255	255	3060	3060				253	2	255	255	255	510	510
	14	3	255	255	255	765	765				254	2	255	255	255	510	510
	15	8	255	255	255	2040	2040				255	160	255	255	255	40800	40800
	16	139	255	255	255	35445	35445				256	3	255	255	255	765	765
	17	2	255	255	255	510	510				257	2	255	255	255	510	510
	18	4	255	255	255	1020	1020				258	9	255	255	255	2295	2295
	19	149	255	255	255	37995	37995				259	5	255	255	255	1275	1275
	20	2	255	255	255	510	510				260	2	255	255	255	510	510
	21	6	255	255	255	1530	1530				261	2	255	255	255	510	510
	22	7	255	255	255	1785	1785				262	3	255	255	255	765	765
	23	2	255	255	255	510	510				263	7	255	255	255	1785	1785
	24	4	255	255	255	1020	1020				264	49	255	255	255	12495	12495
	25	5	255	255	255	1275	1275				265	2	255	255	255	510	510
	26	2	255	255	255	510	510				266	5	255	255	255	1275	1275
	27	38	255	255	255	9690	9690				267	40	255	255	255	10200	10200
	28	9	255	255	255	2295	2295				268	2	255	255	255	510	510
	29	11	255	255	255	2805	2805				269	134	255	255	255	34170	34170
	30	2	255	255	255	510	510				270	120	255	255	255	30600	30600
	31	4	255	255	255	1020	1020				271	69	255	255	255	17595	17595
	32	6	255	255	255	1530	1530				272	2	255	255	255	510	510
	33	4	255	255	255	1020	1020				273	2	255	255	255	510	510
	34	9	255	255	255	2295	2295				274	4	255	255	255	1020	1020
	35	54	255	255	255	13770	13770				275	3	255	255	255	765	765
	36	3	255	255	255	765	765				276	9	255	255	255	2295	2295
	37	5	255	255	255	1275	1275				277	3	255	255	255	765	765
	38	19	255	255	255	4845	4845				278	2	255	255	255	510	510
	39	19	255	255	255	4845	4845				279	3	255	255	255	765	765
	40	2	255	255	255	510	510				280	4	255	255	255	1020	1020
	41	2	255	255	255	510	510				281	55	255	255	255	14025	14025
	42	2	255	255	255	510	510				282	4	255	255	255	1020	1020
	43	2	255	255	255	510	510				283	3	255	255	255	765	765
	44	2	255	255	255	510	510				284	3	255	255	255	765	765
	45	188	255	255	255	47940	47940				285	3	255	255	255	765	765
	46	2	255	255	255	510	510				286	3	255	255	255	765	765
	47	186	255	255	255	47430	47430				287	2	255	255	255	510	510
	48	9	255	255	255	2295	2295				288	2	255	255	255	510	510
	49	11	255	255	255	2805	2805				289	5	255	255	255	1275	1275
	50	47	255	255	255	11985	11985				290	3	255	255	255	765	765
	51	12	255	255	255	3060	3060				291	5	255	255	255	1275	1275
	52	6	255	255	255	1530	1530				292	2	255	255	255	510	510
	53	5	255	255	255	1275	1275				293	5	255	255	255	1275	1275
	54	5	255	255	255	1275	1275				294	2	255	255	255	510	510
	55	3	255	255	255	765	765				295	2	255	255	255	510	510
	56	2	255	255	255	510	510				296	2	255	255	255	510	510
	57	3	255	255	255	765	765				297	7	255	255	255	1785	1785
	58	3	255	255	255	765	765				298	2	255	255	255	510	510
	59	2	255	255	255	510	510				299	23	255	255	255	5865	5865
	60	14	255	255	255	3570	3570				300	6	255	255	255	1530	1530
	61	2	255	255	255	510	510				301	102	255	255	255	26010	26010
	62	6	255	255	255	1530	1530				302	3	255	255	255	765	765
	63	21	255	255	255	5355	5355				303	74	255	255	255	18870	18870
	64	3	255	255	255	765	765				304	2	255	255	255	510	510
	65	2	255	255	255	510	510				305	22	255	255	255	5610	5610
	66	3	255	255	255	765	765				306	3	255	255	255	765	765
	67	2	255	255	255	510	510				307	118	255	255	255	30090	30090
	68	2	255	255	255	510	510				308	6	255	255	255	1530	1530
	69	2	255	255	255	510	510				309	119	255	255	255	30345	30345
	70	3	255	255	255	765	765				310	127	255	255	255	32385	32385
	71	2	255	255	255	510	510				311	4	255	255	255	1020	1020
	72	7	255	255	255	1785	1785				312	2	255	255	255	510	510
	73	4	255	255	255	1020	1020				313	5	255	255	255	1275	1275
	74	3	255	255	255	765	765				314	54	255	255	255	13770	13770
	75	2	255	255	255	510	510				315	2	255	255	255	510	510
	76	31	255	255	255	7905	7905				316	5	255	255	255	1275	1275
	77	4	255	255	255	1020	1020				317	257	255	255	255	65535	65535
	78	122	255	255	255	31110	31110				318	2	255	255	255	510	510
	79	61	255	255	255	15555	15555				319	16	255	255	255	4080	4080
	80	2	255	255	255	510	510				320	94	255	255	255	23970	23970
	81	2	255	255	255	510	510				321	8	255	255	255	2040	2040
	82	2	255	255	255	510	510				322	2	255	255	255	510	510
	83	2	255	255	255	510	510				323	5	255	255	255	1275	1275
	84	4	255	255	255	1020	1020				1	133	255	255	255	33915	33915
	85	2	255	255	255	510	510				2	52	255	255	255	13260	13260
	1	271	255	255	255	69105	69105				3	230	255	255	255	58650	58650
	2	109610	255	255	255	27950550	27950550				4	55	255	255	255	14025	14025
	3	9	255	255	255	2295	2295				5	2	255	255	255	510	510
	4	3	255	255	255	765	765				6	37	255	255	255	9435	9435
	5	3	255	255	255	765	765				7	7	255	255	255	1785	1785
	6	14	255	255	255	3570	3570				8	4	255	255	255	1020	1020
	7	5	255	255	255	1275	1275				9	4	255	255	255	1020	1020
	8	3	255	255	255	765	765				10	4	255	255	255	1020	1020
	9	126	255	255	255	32130	32130				11	38	255	255	255	9690	9690
	10	161	255	255	255	41055	41055				12	9	255	255	255	2295	2295
	11	2	255	255	255	510	510				13	636	255	255	255	162180	162180
	12	2	255	255	255	510	510				14	8	255	255	255	2040	2040
	13	169	255	255	255	43095	43095				15	13	255	255	255	3315	3315
	14	2	255	255	255	510	510				16	9	255	255	255	2295	2295
	15	153	255	255	255	39015	39015				17	60	255	255	255	15300	15300
	16	2	255	255	255	510	510				18	2	255	255	255	510	510
	17	255	255	255	255	65025	65025				19	6	255	255	255	1530	1530
	18	11	255	255	255	2805	2805				20	20	255	255	255	5100	5100
	19	36	255	255	255	9180	9180				21	3	255	255	255	765	765
	20	2	255	255	255	510	510				22	323	255	255	255	82365	82365
	21	17	255	255	255	4335	4335				23	2	255	255	255	510	510
	22	4	255	255	255	1020	1020				24	4	255	255	255	1020	1020
	23	218	255	255	255	55590	55590				25	13	255	255	255	3315	3315
	24	208	255	255	255	53040	53040				26	2	255	255	255	510	510
	25	24	255	255	255	6120	6120				27	2	255	255	255	510	510
	26	6	255	255	255	1530	1530				28	466	255	255	255	118830	118830
	27	19	255	255	255	4845	4845				29	380	255	255	255	96900	96900
	28	3	255	255	255	765	765				30	7	255	255	255	1785	1785
	29	4	255	255	255	1020	1020				31	2	255	255	255	510	510
	30	16	255	255	255	4080	4080				32	101	255	255	255	25755	25755
	31	3	255	255	255	765	765				33	7	255	255	255	1785	1785
	32	150	255	255	255	38250	38250				34	2	255	255	255	510	510
	33	2	255	255	255	510	510				35	2	255	255	255	510	510
	34	4	255	255	255	1020	1020				36	3	255	255	255	765	765
	35	21	255	255	255	5355	5355				37	86	255	255	255	21930	21930
	36	4	255	255	255	1020	1020				38	12	255	255	255	3060	3060
	37	2	255	255	255	510	510				39	3	255	255	255	765	765
	38	243	255	255	255	61965	61965				40	2	255	255	255	510	510
	39	2	255	255	255	510	510				41	2	255	255	255	510	510
	40	56	255	255	255	14280	14280				42	105	255	255	255	26775	26775
	41	12	255	255	255	3060	3060				43	61	255	255	255	15555	15555
	42	2	255	255	255	510	510				44	2	255	255	255	510	510
	43	3	255	255	255	765	765				45	3	255	255	255	765	765
	44	168	255	255	255	42840	42840				46	2	255	255	255	510	510
	45	4	255	255	255	1020	1020				47	19	255	255	255	4845	4845
	46	3	255	255	255	765	765				48	12	255	255	255	3060	3060
	47	9	255	255	255	2295	2295				49	158	255	255	255	40290	40290
	48	24	255	255	255	6120	6120				50	39	255	255	255	9945	9945
	49	2	255	255	255	510	510				51	10	255	255	255	2550	2550
											52	2	255	255	255	510	510
											53	2	255	255	255	510	510
											54	49	255	255	255	12495	12495
											55	2	255	255	255	510	510
											56	32	255	255	255	8160	8160
											57	645	255	255	255	164475	164475
											58	57	255	255	255	14535	14535
											59	2	255	255	255	510	510
											60	49	255	255	255	12495	12495
											61	2	255	255	255	510	510
											62	2	255	255	255	510	510
											63	218	255	255	255	55590	55590
											64	4	255	255	255	1020	1020
											65	57	255	255	255	14535	14535
											66	2	255	255	255	510	510
											67	2	255	255	255	510	510
											68	2	255	255	255	510	510
											69	5	255	255	255	1275	1275
											70	90	255	255	255	22950	22950
											71	9	255	255	255	2295	2295
											72	5	255	255	255	1275	1275
											73	528	255	255	255	134640	134640
											74	39	255	255	255	9945	9945
											75	3	255	255	255	765	765
											76	389	255	255	255	99195	99195
											77	2	255	255	255	510	510
											78	50	255	255	255	12750	12750
											79	203	255	255	255	51765	51765
											80	4	255	255	255	1020	1020
											81	6	255	255	255	1530	1530
											82	3	255	255	255	765	765
											83	2	255	255	255	510	510
											84	3	255	255	255	765	765
											85	11	255	255	255	2805	2805
											86	7	255	255	255	1785	1785
											87	2	255	255	255	510	510
											88	317	255	255	255	80835	80835
											89	3	255	255	255	765	765
											90	2	255	255	255	510	510
											91	136	255	255	255	34680	34680
											92	8	255	255	255	2040	2040
											93	3	255	255	255	765	765
											94	175	255	255	255	44625	44625
											95	2	255	255	255	510	510
											96	105	255	255	255	26775	26775
											97	23	255	255	255	5865	5865
											98	179	255	255	255	45645	45645
											99	2	255	255	255	510	510
											100	2	255	255	255	510	510
											101	2	255	255	255	510	510
											102	2	255	255	255	510	510
											103	121	255	255	255	30855	30855
											104	2	255	255	255	510	510
											105	2	255	255	255	510	510
											106	5	255	255	255	1275	1275
											107	2	255	255	255	510	510
											108	105	255	255	255	26775	26775
											109	2	255	255	255	510	510
											110	2	255	255	255	510	510
											111	3	255	255	255	765	765
											112	2	255	255	255	510	510
											113	191	255	255	255	48705	48705
											114	11	255	255	255	2805	2805
											115	3	255	255	255	765	765
											116	9	255	255	255	2295	2295
											117	23	255	255	255	5865	5865
											118	2	255	255	255	510	510
											119	95	255	255	255	24225	24225
											120	4	255	255	255	1020	1020
											121	143	255	255	255	36465	36465
											122	180	255	255	255	45900	45900
											123	69	255	255	255	17595	17595
											124	2	255	255	255	510	510
											125	2	255	255	255	510	510
											126	65	255	255	255	16575	16575
											127	315	255	255	255	80325	80325
											128	67	255	255	255	17085	17085
											129	2	255	255	255	510	510
											130	86	255	255	255	21930	21930
											131	146	255	255	255	37230	37230
											132	112	255	255	255	28560	28560
											133	3	255	255	255	765	765
											134	206	255	255	255	52530	52530
											135	4	255	255	255	1020	1020
											136	7	255	255	255	1785	1785
											137	2	255	255	255	510	510
											138	2	255	255	255	510	510
											139	2	255	255	255	510	510
											140	3	255	255	255	765	765
											141	2	255	255	255	510	510
											142	4	255	255	255	1020	1020
											143	2	255	255	255	510	510
											144	77	255	255	255	19635	19635
											145	4	255	255	255	1020	1020
											146	5	255	255	255	1275	1275
											147	4	255	255	255	1020	1020
											148	9	255	255	255	2295	2295
											149	4	255	255	255	1020	1020
											150	8	255	255	255	2040	2040
											151	18	255	255	255	4590	4590
											152	53	255	255	255	13515	13515
											153	2	255	255	255	510	510
											154	52	255	255	255	13260	13260
											155	2	255	255	255	510	510
											156	17	255	255	255	4335	4335
											157	2	255	255	255	510	510
											158	90	255	255	255	22950	22950
											159	2	255	255	255	510	510
											160	104	255	255	255	26520	26520
											161	57	255	255	255	14535	14535
											162	34	255	255	255	8670	8670
											163	17	255	255	255	4335	4335
											164	4	255	255	255	1020	1020
											165	43	255	255	255	10965	10965
											166	2	255	255	255	510	510
											167	43	255	255	255	10965	10965
											168	17	255	255	255	4335	4335
											169	16	255	255	255	4080	4080
											170	61	255	255	255	15555	15555
											171	346	255	255	255	88230	88230
											172	4	255	255	255	1020	1020
											173	131	255	255	255	33405	33405
											174	116	255	255	255	29580	29580
											175	212	255	255	255	54060	54060
											176	64	255	255	255	16320	16320
											177	2	255	255	255	510	510
											178	290	255	255	255	73950	73950
											179	4	255	255	255	1020	1020
											180	16	255	255	255	4080	4080
											181	39	255	255	255	9945	9945
											182	56	255	255	255	14280	14280
											183	68	255	255	255	17340	17340
											184	2	255	255	255	510	510
											185	4	255	255	255	1020	1020
											186	200	255	255	255	51000	51000
											187	75	255	255	255	19125	19125
											188	208	255	255	255	53040	53040
											189	2	255	255	255	510	510
											190	2	255	255	255	510	510
											191	85	255	255	255	21675	21675
											192	32	255	255	255	8160	8160
											193	61	255	255	255	15555	15555
											194	92	255	255	255	23460	23460
											195	8	255	255	255	2040	2040
											196	222	255	255	255	56610	56610
											197	2	255	255	255	510	510
											198	2	255	255	255	510	510
											199	2	255	255	255	510	510
											200	2	255	255	255	510	510
											201	612	255	255	255	156060	156060
											202	2	255	255	255	510	510
											203	2	255	255	255	510	510
											204	3	255	255	255	765	765
											205	2	255	255	255	510	510
											206	2	255	255	255	510	510
											207	66	255	255	255	16830	16830
											208	2	255	255	255	510	510
											209	130	255	255	255	33150	33150
											210	12	255	255	255	3060	3060
											211	5	255	255	255	1275	1275
											212	6	255	255	255	1530	1530
											213	11	255	255	255	2805	2805
											214	13	255	255	255	3315	3315
											215	65	255	255	255	16575	16575
											216	23	255	255	255	5865	5865
											217	2	255	255	255	510	510
											218	3	255	255	255	765	765
											219	5	255	255	255	1275	1275
											220	2	255	255	255	510	510
											221	3	255	255	255	765	765
											222	7	255	255	255	1785	1785
											223	10	255	255	255	2550	2550
											224	5	255	255	255	1275	1275
											225	11	255	255	255	2805	2805
											226	77	255	255	255	19635	19635
											227	3	255	255	255	765	765
											228	79	255	255	255	20145	20145
											229	2	255	255	255	510	510
											230	5	255	255	255	1275	1275
											231	434	255	255	255	110670	110670
											232	2	255	255	255	510	510
											233	2	255	255	255	510	510
											234	4	255	255	255	1020	1020
											235	119	255	255	255	30345	30345
											236	2	255	255	255	510	510
											237	52	255	255	255	13260	13260
											238	13	255	255	255	3315	3315
											239	2	255	255	255	510	510
											240	63	255	255	255	16065	16065
											241	7	255	255	255	1785	1785
											242	2	255	255	255	510	510
											243	68	255	255	255	17340	17340
											244	3	255	255	255	765	765
											245	3	255	255	255	765	765
											246	65	255	255	255	16575	16575
											247	3	255	255	255	765	765
											248	5	255	255	255	1275	1275
											249	3	255	255	255	765	765
											250	115	255	255	255	29325	29325
											251	2	255	255	255	510	510
											252	4	255	255	255	1020	1020
											253	3	255	255	255	765	765
											254	2	255	255	255	510	510
											255	4	255	255	255	1020	1020
											256	2	255	255	255	510	510
											257	66	255	255	255	16830	16830
											258	7	255	255	255	1785	1785
											259	2	255	255	255	510	510
											260	124	255	255	255	31620	31620
											261	2	255	255	255	510	510
											262	26	255	255	255	6630	6630
											263	22	255	255	255	5610	5610
											264	45	255	255	255	11475	11475
											265	31	255	255	255	7905	7905
											266	3	255	255	255	765	765
											267	92	255	255	255	23460	23460
											268	66	255	255	255	16830	16830
											269	8	255	255	255	2040	2040
											270	10	255	255	255	2550	2550
											271	92	255	255	255	23460	23460
											272	66	255	255	255	16830	16830
											273	2	255	255	255	510	510
											274	4	255	255	255	1020	1020
											275	6	255	255	255	1530	1530
											276	3	255	255	255	765	765
											277	507	255	255	255	129285	129285
											278	4	255	255	255	1020	1020
											279	4	255	255	255	1020	1020
											280	40	255	255	255	10200	10200
											281	2	255	255	255	510	510
											282	2	255	255	255	510	510
											283	37	255	255	255	9435	9435
											284	71	255	255	255	18105	18105
											285	2	255	255	255	510	510
											286	3	255	255	255	765	765
											287	7	255	255	255	1785	1785
											288	107	255	255	255	27285	27285
											289	2	255	255	255	510	510
											290	35	255	255	255	8925	8925
											291	98	255	255	255	24990	24990
											292	2	255	255	255	510	510
											293	13	255	255	255	3315	3315
											294	14	255	255	255	3570	3570
											295	2	255	255	255	510	510
											296	106	255	255	255	27030	27030
											297	98	255	255	255	24990	24990
											298	208	255	255	255	53040	53040
											299	181	255	255	255	46155	46155
											300	90	255	255	255	22950	22950
											301	73	255	255	255	18615	18615
											302	44	255	255	255	11220	11220
											303	3	255	255	255	765	765
											304	2	255	255	255	510	510
											305	19	255	255	255	4845	4845
											306	199	255	255	255	50745	50745
											307	2	255	255	255	510	510
											308	27	255	255	255	6885	6885
											309	62	255	255	255	15810	15810
											310	50	255	255	255	12750	12750
											311	2	255	255	255	510	510
											312	31	255	255	255	7905	7905
											313	4	255	255	255	1020	1020
											314	23	255	255	255	5865	5865
											315	2	255	255	255	510	510
											316	2	255	255	255	510	510
											317	2	255	255	255	510	510
											1	44	255	255	255	11220	11220
											2	172	255	255	255	43860	43860
											3	37352	255	255	255	9524760	9524760
											4	2674	255	255	255	681870	681870
											5	72	255	255	255	18360	18360
											6	152	255	255	255	38760	38760
											7	3	255	255	255	765	765
											8	46	255	255	255	11730	11730
											9	5	255	255	255	1275	1275
											10	2	255	255	255	510	510
											11	7	255	255	255	1785	1785
											12	511	255	255	255	130305	130305
											13	4	255	255	255	1020	1020
											14	2	255	255	255	510	510
											15	2	255	255	255	510	510
											16	2	255	255	255	510	510
											17	5	255	255	255	1275	1275
											18	2	255	255	255	510	510
											19	5	255	255	255	1275	1275
											20	2	255	255	255	510	510
											21	2	255	255	255	510	510
											22	2	255	255	255	510	510
											23	2	255	255	255	510	510
											24	5	255	255	255	1275	1275
											25	3	255	255	255	765	765
											26	2	255	255	255	510	510
											27	2	255	255	255	510	510
											28	2	255	255	255	510	510
											29	2	255	255	255	510	510
											30	2	255	255	255	510	510
											31	2	255	255	255	510	510
											32	2	255	255	255	510	510
											33	2	255	255	255	510	510
											34	3	255	255	255	765	765
											35	3	255	255	255	765	765
											36	2	255	255	255	510	510
											37	127	255	255	255	32385	32385
											38	11	255	255	255	2805	2805
											39	2	255	255	255	510	510
											40	27	255	255	255	6885	6885
											41	6	255	255	255	1530	1530
											42	3	255	255	255	765	765
											43	1278	255	255	255	325890	325890
											44	4	255	255	255	1020	1020
											45	2	255	255	255	510	510
											46	6	255	255	255	1530	1530
											47	4	255	255	255	1020	1020
											48	5	255	255	255	1275	1275
											49	4	255	255	255	1020	1020
											50	2	255	255	255	510	510
											51	2	255	255	255	510	510
											52	6	255	255	255	1530	1530
											53	3	255	255	255	765	765
											54	4	255	255	255	1020	1020
											55	2	255	255	255	510	510
											56	321	255	255	255	81855	81855
											57	31	255	255	255	7905	7905
											58	7	255	255	255	1785	1785
											59	3	255	255	255	765	765
											60	5	255	255	255	1275	1275
											61	3	255	255	255	765	765
											62	2	255	255	255	510	510
											63	2	255	255	255	510	510
											64	18	255	255	255	4590	4590
											65	2	255	255	255	510	510
											66	2	255	255	255	510	510
											67	3	255	255	255	765	765
											68	4	255	255	255	1020	1020
											69	3	255	255	255	765	765
											70	3	255	255	255	765	765
											71	10	255	255	255	2550	2550
											72	2	255	255	255	510	510
											73	2	255	255	255	510	510
											74	13	255	255	255	3315	3315
											75	2	255	255	255	510	510
											76	2	255	255	255	510	510
											77	6	255	255	255	1530	1530
											78	12	255	255	255	3060	3060
											79	2	255	255	255	510	510
											80	2	255	255	255	510	510
											81	27	255	255	255	6885	6885
											82	3	255	255	255	765	765
											83	174	255	255	255	44370	44370
											84	2	255	255	255	510	510
											85	4	255	255	255	1020	1020
											86	14	255	255	255	3570	3570
											87	183	255	255	255	46665	46665
											88	5	255	255	255	1275	1275
											89	2	255	255	255	510	510
											90	4	255	255	255	1020	1020
											91	2	255	255	255	510	510
											92	11	255	255	255	2805	2805
											93	3	255	255	255	765	765
											94	57	255	255	255	14535	14535
											95	16	255	255	255	4080	4080
											96	106	255	255	255	27030	27030
											97	4	255	255	255	1020	1020
											98	2	255	255	255	510	510
											99	21	255	255	255	5355	5355
											100	395	255	255	255	100725	100725
											101	90	255	255	255	22950	22950
											102	10	255	255	255	2550	2550
											103	185	255	255	255	47175	47175
											104	2	255	255	255	510	510
											105	4	255	255	255	1020	1020
											106	14	255	255	255	3570	3570
											107	119	255	255	255	30345	30345
											108	5	255	255	255	1275	1275
											109	2	255	255	255	510	510
											110	67	255	255	255	17085	17085
											111	2	255	255	255	510	510
											112	2	255	255	255	510	510
											113	4	255	255	255	1020	1020
											114	5	255	255	255	1275	1275
											115	2	255	255	255	510	510
											116	68	255	255	255	17340	17340
											117	23	255	255	255	5865	5865
											118	194	255	255	255	49470	49470
											119	40	255	255	255	10200	10200
											120	2	255	255	255	510	510
											121	97	255	255	255	24735	24735
											122	448	255	255	255	114240	114240
											123	92	255	255	255	23460	23460
											124	2	255	255	255	510	510
											125	2	255	255	255	510	510
											126	2	255	255	255	510	510
											127	7	255	255	255	1785	1785
											128	47	255	255	255	11985	11985
											129	85	255	255	255	21675	21675
											130	3	255	255	255	765	765
											131	3	255	255	255	765	765
											132	2	255	255	255	510	510
											133	3	255	255	255	765	765
											134	3	255	255	255	765	765
											135	2	255	255	255	510	510
											136	2	255	255	255	510	510
											137	25	255	255	255	6375	6375
											138	5	255	255	255	1275	1275
											139	9	255	255	255	2295	2295
											140	3	255	255	255	765	765
											141	4	255	255	255	1020	1020
											142	2	255	255	255	510	510
											143	2	255	255	255	510	510
											144	2	255	255	255	510	510
											145	3	255	255	255	765	765
											146	32	255	255	255	8160	8160
											147	207	255	255	255	52785	52785
											148	7	255	255	255	1785	1785
											149	2	255	255	255	510	510
											150	2	255	255	255	510	510
											151	55	255	255	255	14025	14025
											152	3	255	255	255	765	765
											153	2	255	255	255	510	510
											154	3	255	255	255	765	765
											155	2	255	255	255	510	510
											156	3	255	255	255	765	765
											157	14	255	255	255	3570	3570
											158	10	255	255	255	2550	2550
											159	2	255	255	255	510	510
											160	2	255	255	255	510	510
											161	2	255	255	255	510	510
											162	2	255	255	255	510	510
											163	577	255	255	255	147135	147135
											164	2	255	255	255	510	510
											165	2	255	255	255	510	510
											166	2	255	255	255	510	510
											167	2	255	255	255	510	510
											168	2	255	255	255	510	510
											169	9	255	255	255	2295	2295
											170	139	255	255	255	35445	35445
											171	2	255	255	255	510	510
											172	46	255	255	255	11730	11730
											173	26	255	255	255	6630	6630
											174	360	255	255	255	91800	91800
											175	79	255	255	255	20145	20145
											176	106	255	255	255	27030	27030
											177	2	255	255	255	510	510
											178	2	255	255	255	510	510
											179	2	255	255	255	510	510
											180	254	255	255	255	64770	64770
											181	2	255	255	255	510	510
											182	26	255	255	255	6630	6630
											183	2	255	255	255	510	510
											184	5	255	255	255	1275	1275
											185	3	255	255	255	765	765
											186	2	255	255	255	510	510
											187	2	255	255	255	510	510
											188	16	255	255	255	4080	4080
											189	75	255	255	255	19125	19125
											190	2	255	255	255	510	510
											191	2	255	255	255	510	510
											192	168	255	255	255	42840	42840
											193	3	255	255	255	765	765
											194	5	255	255	255	1275	1275
											195	2	255	255	255	510	510
											196	2	255	255	255	510	510
											197	3	255	255	255	765	765
											198	2	255	255	255	510	510
											199	64	255	255	255	16320	16320
											200	88	255	255	255	22440	22440
											201	2	255	255	255	510	510
											202	3	255	255	255	765	765
											203	2	255	255	255	510	510
											204	234	255	255	255	59670	59670
											205	2	255	255	255	510	510
											206	4	255	255	255	1020	1020
											207	2	255	255	255	510	510
											208	5399	255	255	255	1376745	1376745
											209	4	255	255	255	1020	1020
											210	51	255	255	255	13005	13005
											211	2	255	255	255	510	510
											212	10	255	255	255	2550	2550
											213	72	255	255	255	18360	18360
											214	3	255	255	255	765	765
											215	587	255	255	255	149685	149685
											216	2	255	255	255	510	510
											217	72	255	255	255	18360	18360
											218	3	255	255	255	765	765
											219	2	255	255	255	510	510
											220	5	255	255	255	1275	1275
											221	6	255	255	255	1530	1530
											222	4	255	255	255	1020	1020
											223	7	255	255	255	1785	1785
											224	91	255	255	255	23205	23205
											225	6	255	255	255	1530	1530
											226	4	255	255	255	1020	1020
											227	3	255	255	255	765	765
											228	341	255	255	255	86955	86955
											229	3	255	255	255	765	765
											230	2	255	255	255	510	510
											231	3	255	255	255	765	765
											232	2	255	255	255	510	510
											233	2	255	255	255	510	510
											234	1029	255	255	255	262395	262395
											235	2	255	255	255	510	510
											236	2	255	255	255	510	510
											237	2	255	255	255	510	510
											238	2	255	255	255	510	510
											239	4	255	255	255	1020	1020
											240	2	255	255	255	510	510
											241	65	255	255	255	16575	16575
											242	2	255	255	255	510	510
											243	3	255	255	255	765	765
											244	21	255	255	255	5355	5355
											245	102	255	255	255	26010	26010
											246	126	255	255	255	32130	32130
											247	2	255	255	255	510	510
											248	2	255	255	255	510	510
											249	2	255	255	255	510	510
											250	2	255	255	255	510	510
											251	2	255	255	255	510	510
											252	2	255	255	255	510	510
											253	2	255	255	255	510	510
											254	2	255	255	255	510	510
											255	6	255	255	255	1530	1530
											256	3	255	255	255	765	765
											257	3	255	255	255	765	765
											258	2	255	255	255	510	510
											259	2	255	255	255	510	510
											260	3	255	255	255	765	765
											261	6	255	255	255	1530	1530
											262	3	255	255	255	765	765
											263	3	255	255	255	765	765
											264	269	255	255	255	68595	68595
											265	715	255	255	255	182325	182325
											266	9	255	255	255	2295	2295
											267	59	255	255	255	15045	15045
											268	5	255	255	255	1275	1275
											269	7	255	255	255	1785	1785
											270	2	255	255	255	510	510
											271	2	255	255	255	510	510
											272	2	255	255	255	510	510
											273	2	255	255	255	510	510
											274	2	255	255	255	510	510
											275	70	255	255	255	17850	17850
											276	2	255	255	255	510	510
											277	46	255	255	255	11730	11730
											278	20	255	255	255	5100	5100
											279	41	255	255	255	10455	10455
											280	3	255	255	255	765	765
											281	2	255	255	255	510	510
											282	2	255	255	255	510	510
											283	287	255	255	255	73185	73185
											284	2	255	255	255	510	510
											285	4	255	255	255	1020	1020
											286	6	255	255	255	1530	1530
											287	2	255	255	255	510	510
											288	5	255	255	255	1275	1275
											289	2	255	255	255	510	510
											290	4	255	255	255	1020	1020
											291	3	255	255	255	765	765
											292	74	255	255	255	18870	18870
											293	2	255	255	255	510	510
											294	234	255	255	255	59670	59670
											295	66	255	255	255	16830	16830
											296	2	255	255	255	510	510
											297	2	255	255	255	510	510
											298	3	255	255	255	765	765
											299	2	255	255	255	510	510
											300	2	255	255	255	510	510
											301	2	255	255	255	510	510
											302	2	255	255	255	510	510
											303	2	255	255	255	510	510
											304	2	255	255	255	510	510
											305	3	255	255	255	765	765
											306	2	255	255	255	510	510
											307	66	255	255	255	16830	16830
											308	2	255	255	255	510	510
											309	2	255	255	255	510	510
											310	16	255	255	255	4080	4080
											311	2	255	255	255	510	510
											312	3	255	255	255	765	765
											313	4	255	255	255	1020	1020
											314	2	255	255	255	510	510
											315	3	255	255	255	765	765
											316	10	255	255	255	2550	2550
											317	3	255	255	255	765	765
											318	3	255	255	255	765	765
											319	2	255	255	255	510	510
											320	280	255	255	255	71400	71400
											321	30	255	255	255	7650	7650
											322	64	255	255	255	16320	16320
											323	2	255	255	255	510	510
											324	5	255	255	255	1275	1275
											325	2	255	255	255	510	510
											326	96	255	255	255	24480	24480
											327	2	255	255	255	510	510
											328	3	255	255	255	765	765
											329	3	255	255	255	765	765
											330	4	255	255	255	1020	1020
											331	5	255	255	255	1275	1275
											332	4	255	255	255	1020	1020
											333	3	255	255	255	765	765
											334	3	255	255	255	765	765
											335	5	255	255	255	1275	1275
											336	2	255	255	255	510	510
											337	4	255	255	255	1020	1020
											338	2	255	255	255	510	510
											339	2	255	255	255	510	510
											340	3	255	255	255	765	765
											341	98	255	255	255	24990	24990
											342	2	255	255	255	510	510
											343	2	255	255	255	510	510
											344	2	255	255	255	510	510
											345	3	255	255	255	765	765
											346	3	255	255	255	765	765
											347	22	255	255	255	5610	5610
											348	123	255	255	255	31365	31365
											349	2	255	255	255	510	510
											350	2	255	255	255	510	510
											351	2	255	255	255	510	510
											352	2	255	255	255	510	510
											353	2	255	255	255	510	510
											354	1356	255	255	255	345780	345780
											355	3	255	255	255	765	765
											356	3	255	255	255	765	765
											357	93	255	255	255	23715	23715
											358	2	255	255	255	510	510
											359	112	255	255	255	28560	28560
											360	2	255	255	255	510	510
											361	2	255	255	255	510	510
											362	74	255	255	255	18870	18870
											363	3	255	255	255	765	765
											364	2	255	255	255	510	510
											365	93	255	255	255	23715	23715
											366	4	255	255	255	1020	1020
											367	5	255	255	255	1275	1275
											368	58	255	255	255	14790	14790
											369	2	255	255	255	510	510
											370	5	255	255	255	1275	1275
											371	2	255	255	255	510	510
											372	84	255	255	255	21420	21420
											373	2	255	255	255	510	510
											374	965	255	255	255	246075	246075
											375	2	255	255	255	510	510
											376	3	255	255	255	765	765
											377	60	255	255	255	15300	15300
											378	49	255	255	255	12495	12495
											379	6	255	255	255	1530	1530
											380	29	255	255	255	7395	7395
											381	2	255	255	255	510	510
											382	4	255	255	255	1020	1020
											383	2	255	255	255	510	510
											384	2	255	255	255	510	510
											385	2	255	255	255	510	510
											386	79	255	255	255	20145	20145
											387	2	255	255	255	510	510
											388	70	255	255	255	17850	17850
											389	117	255	255	255	29835	29835
											390	95	255	255	255	24225	24225
											391	5	255	255	255	1275	1275
											392	2	255	255	255	510	510
											393	2	255	255	255	510	510
											394	42	255	255	255	10710	10710
											395	2	255	255	255	510	510
											396	3	255	255	255	765	765
											397	2	255	255	255	510	510
											398	7	255	255	255	1785	1785
											399	2	255	255	255	510	510
											400	2	255	255	255	510	510
											401	2	255	255	255	510	510
											402	2	255	255	255	510	510
											403	94	255	255	255	23970	23970
											404	126	255	255	255	32130	32130
											405	181	255	255	255	46155	46155
											406	6	255	255	255	1530	1530
											407	2	255	255	255	510	510
											408	2	255	255	255	510	510
											409	3	255	255	255	765	765
											410	2	255	255	255	510	510
											411	2	255	255	255	510	510
											412	56	255	255	255	14280	14280
											413	59	255	255	255	15045	15045
											414	2	255	255	255	510	510
											415	3	255	255	255	765	765
											416	4	255	255	255	1020	1020
											417	4	255	255	255	1020	1020
											418	14	255	255	255	3570	3570
											419	2	255	255	255	510	510
											420	2	255	255	255	510	510
											421	52	255	255	255	13260	13260
											422	2	255	255	255	510	510
											423	2	255	255	255	510	510
											424	2	255	255	255	510	510
											425	2	255	255	255	510	510
											426	31	255	255	255	7905	7905
											427	2	255	255	255	510	510
											428	4	255	255	255	1020	1020
											429	2	255	255	255	510	510
											430	4	255	255	255	1020	1020
											431	78	255	255	255	19890	19890
											432	2	255	255	255	510	510
											433	2	255	255	255	510	510
											434	3	255	255	255	765	765
											435	5	255	255	255	1275	1275
											436	4	255	255	255	1020	1020
											437	3	255	255	255	765	765
											438	4	255	255	255	1020	1020
											439	53	255	255	255	13515	13515
											440	74	255	255	255	18870	18870
											441	2	255	255	255	510	510
											442	2	255	255	255	510	510
											443	3	255	255	255	765	765
											444	46	255	255	255	11730	11730
											445	4	255	255	255	1020	1020
											446	52	255	255	255	13260	13260
											447	3	255	255	255	765	765
											448	2	255	255	255	510	510
											449	2	255	255	255	510	510
											450	89	255	255	255	22695	22695
											451	2	255	255	255	510	510
											452	136	255	255	255	34680	34680
											453	9	255	255	255	2295	2295
											454	2	255	255	255	510	510
											455	2	255	255	255	510	510
											456	118	255	255	255	30090	30090
											457	4	255	255	255	1020	1020
											458	2	255	255	255	510	510
											459	2	255	255	255	510	510
											460	2	255	255	255	510	510
											461	2	255	255	255	510	510
											462	16	255	255	255	4080	4080
											463	2	255	255	255	510	510
											464	590	255	255	255	150450	150450
											465	2	255	255	255	510	510
											466	494	255	255	255	125970	125970
											467	4	255	255	255	1020	1020
											468	46	255	255	255	11730	11730
											469	2	255	255	255	510	510
											470	4	255	255	255	1020	1020
											471	40	255	255	255	10200	10200
											472	2	255	255	255	510	510
											473	3	255	255	255	765	765
											474	2	255	255	255	510	510
											475	42	255	255	255	10710	10710
											476	25	255	255	255	6375	6375
											477	49	255	255	255	12495	12495
											478	31	255	255	255	7905	7905
											479	3	255	255	255	765	765
											480	3	255	255	255	765	765
											481	14	255	255	255	3570	3570
											482	5	255	255	255	1275	1275
											483	2	255	255	255	510	510
											1	3	255	255	255	765	765
											2	61961	255	255	255	15800055	15800055
											3	26	255	255	255	6630	6630
											4	27	255	255	255	6885	6885
											5	2	255	255	255	510	510
											6	56	255	255	255	14280	14280
											7	31	255	255	255	7905	7905
											8	2	255	255	255	510	510
											9	41	255	255	255	10455	10455
											10	114	255	255	255	29070	29070
											11	76	255	255	255	19380	19380
											12	2	255	255	255	510	510
											13	2	255	255	255	510	510
											14	3	255	255	255	765	765
											15	2	255	255	255	510	510
											16	3	255	255	255	765	765
											17	2	255	255	255	510	510
											18	3	255	255	255	765	765
											19	4	255	255	255	1020	1020
											20	7	255	255	255	1785	1785
											21	27	255	255	255	6885	6885
											22	5	255	255	255	1275	1275
											23	2	255	255	255	510	510
											24	2	255	255	255	510	510
											25	3	255	255	255	765	765
											26	3	255	255	255	765	765
											27	3	255	255	255	765	765
											28	3	255	255	255	765	765
											29	2	255	255	255	510	510
											30	4	255	255	255	1020	1020
											31	117	255	255	255	29835	29835
											32	22	255	255	255	5610	5610
											33	2	255	255	255	510	510
											34	15	255	255	255	3825	3825
											35	39	255	255	255	9945	9945
											36	10	255	255	255	2550	2550
											37	2	255	255	255	510	510
											38	300	255	255	255	76500	76500
											39	3	255	255	255	765	765
											40	2	255	255	255	510	510
											41	5	255	255	255	1275	1275
											42	2	255	255	255	510	510
											43	2	255	255	255	510	510
											44	3	255	255	255	765	765
											45	2	255	255	255	510	510
											46	4	255	255	255	1020	1020
											47	2	255	255	255	510	510
											48	2	255	255	255	510	510
											49	70	255	255	255	17850	17850
											50	43	255	255	255	10965	10965
											51	2	255	255	255	510	510
											52	2	255	255	255	510	510
											53	27	255	255	255	6885	6885
											54	2	255	255	255	510	510
											55	2	255	255	255	510	510
											56	4	255	255	255	1020	1020
											57	2	255	255	255	510	510
											58	2	255	255	255	510	510
											59	2	255	255	255	510	510
											60	3	255	255	255	765	765
											61	34	255	255	255	8670	8670
											62	2	255	255	255	510	510
											63	3	255	255	255	765	765
											64	2	255	255	255	510	510
											65	94	255	255	255	23970	23970
											66	3	255	255	255	765	765
											67	25	255	255	255	6375	6375
											68	2	255	255	255	510	510
											69	3	255	255	255	765	765
											70	2	255	255	255	510	510
											71	2	255	255	255	510	510
											72	2	255	255	255	510	510
											73	2	255	255	255	510	510
											74	2	255	255	255	510	510
											75	3	255	255	255	765	765
											76	17	255	255	255	4335	4335
											77	86	255	255	255	21930	21930
											78	3	255	255	255	765	765
											79	2	255	255	255	510	510
											80	2	255	255	255	510	510
											81	44	255	255	255	11220	11220
											82	2	255	255	255	510	510
											83	63	255	255	255	16065	16065
											84	45	255	255	255	11475	11475
											85	22	255	255	255	5610	5610
											86	2	255	255	255	510	510
											87	2	255	255	255	510	510
											88	2	255	255	255	510	510
											89	123	255	255	255	31365	31365
											90	2	255	255	255	510	510
											91	3	255	255	255	765	765
											92	4	255	255	255	1020	1020
											93	2	255	255	255	510	510
											94	2	255	255	255	510	510
											95	2	255	255	255	510	510
											96	224	255	255	255	57120	57120
											97	5	255	255	255	1275	1275
											98	5	255	255	255	1275	1275
											99	102	255	255	255	26010	26010
											100	5	255	255	255	1275	1275
											101	5	255	255	255	1275	1275
											102	3	255	255	255	765	765
											103	36	255	255	255	9180	9180
											104	130	255	255	255	33150	33150
											105	6	255	255	255	1530	1530
											106	4	255	255	255	1020	1020
											107	7	255	255	255	1785	1785
											108	3	255	255	255	765	765
											109	6	255	255	255	1530	1530
											110	52	255	255	255	13260	13260
											111	2	255	255	255	510	510
											112	121	255	255	255	30855	30855
											113	199	255	255	255	50745	50745
											114	2	255	255	255	510	510
											115	2	255	255	255	510	510
											116	49	255	255	255	12495	12495
											117	6	255	255	255	1530	1530
											118	2	255	255	255	510	510
											119	3	255	255	255	765	765
											120	2	255	255	255	510	510
											121	8	255	255	255	2040	2040
											122	3	255	255	255	765	765
											123	80	255	255	255	20400	20400
											124	572	255	255	255	145860	145860
											125	2	255	255	255	510	510
											126	2	255	255	255	510	510
											127	3	255	255	255	765	765
											128	2	255	255	255	510	510
											129	2	255	255	255	510	510
											130	2	255	255	255	510	510
											131	3	255	255	255	765	765
											132	2	255	255	255	510	510
											133	2	255	255	255	510	510
											134	92	255	255	255	23460	23460
											135	2	255	255	255	510	510
											136	3	255	255	255	765	765
											137	119	255	255	255	30345	30345
											138	12	255	255	255	3060	3060
											139	2	255	255	255	510	510
											140	2	255	255	255	510	510
											141	2	255	255	255	510	510
											142	2	255	255	255	510	510
											143	2	255	255	255	510	510
											144	17	255	255	255	4335	4335
											145	3	255	255	255	765	765
											146	7	255	255	255	1785	1785
											147	2	255	255	255	510	510
											148	2	255	255	255	510	510
											149	74	255	255	255	18870	18870
											150	2	255	255	255	510	510
											151	2	255	255	255	510	510
											152	2	255	255	255	510	510
											153	2	255	255	255	510	510
											154	46	255	255	255	11730	11730
											155	3	255	255	255	765	765
											156	6	255	255	255	1530	1530
											157	2	255	255	255	510	510
											158	10	255	255	255	2550	2550
											159	5	255	255	255	1275	1275
											160	3	255	255	255	765	765
											161	197	255	255	255	50235	50235
											162	5	255	255	255	1275	1275
											163	2	255	255	255	510	510
											164	8	255	255	255	2040	2040
											165	19	255	255	255	4845	4845
											166	2	255	255	255	510	510
											167	2	255	255	255	510	510
											168	2	255	255	255	510	510
											169	11	255	255	255	2805	2805
											170	8	255	255	255	2040	2040
											171	2	255	255	255	510	510
											172	2	255	255	255	510	510
											173	2	255	255	255	510	510
											174	3	255	255	255	765	765
											175	2	255	255	255	510	510
											176	12	255	255	255	3060	3060
											177	134	255	255	255	34170	34170
											178	6	255	255	255	1530	1530
											179	3	255	255	255	765	765
											180	3	255	255	255	765	765
											181	44	255	255	255	11220	11220
											182	25	255	255	255	6375	6375
											183	2	255	255	255	510	510
											184	5	255	255	255	1275	1275
											185	2	255	255	255	510	510
											186	3	255	255	255	765	765
											187	6	255	255	255	1530	1530
											188	280	255	255	255	71400	71400
											189	2	255	255	255	510	510
											190	3	255	255	255	765	765
											191	8	255	255	255	2040	2040
											192	3	255	255	255	765	765
											193	2	255	255	255	510	510
											194	5	255	255	255	1275	1275
											195	2	255	255	255	510	510
											196	3	255	255	255	765	765
											197	3	255	255	255	765	765
											198	85	255	255	255	21675	21675
											199	4	255	255	255	1020	1020
											200	3	255	255	255	765	765
											201	144	255	255	255	36720	36720
											202	2	255	255	255	510	510
											203	29	255	255	255	7395	7395
											204	6	255	255	255	1530	1530
											205	3	255	255	255	765	765
											206	2	255	255	255	510	510
											207	3	255	255	255	765	765
											208	2	255	255	255	510	510
											209	30	255	255	255	7650	7650
											210	2	255	255	255	510	510
											211	2	255	255	255	510	510
											212	12	255	255	255	3060	3060
											213	2	255	255	255	510	510
											214	3	255	255	255	765	765
											215	2	255	255	255	510	510
											216	5	255	255	255	1275	1275
											217	4	255	255	255	1020	1020
											218	2	255	255	255	510	510
											219	42	255	255	255	10710	10710
											220	2	255	255	255	510	510
											221	108	255	255	255	27540	27540
											222	3	255	255	255	765	765
											223	3	255	255	255	765	765
											224	2	255	255	255	510	510
											225	106	255	255	255	27030	27030
											226	3	255	255	255	765	765
											227	2	255	255	255	510	510
											228	7	255	255	255	1785	1785
											229	38	255	255	255	9690	9690
											230	3	255	255	255	765	765
											231	149	255	255	255	37995	37995
											232	2	255	255	255	510	510
											233	368	255	255	255	93840	93840
											234	2	255	255	255	510	510
											235	2	255	255	255	510	510
											236	2	255	255	255	510	510
											237	2	255	255	255	510	510
											238	2	255	255	255	510	510
											239	122	255	255	255	31110	31110
											240	7	255	255	255	1785	1785
											241	2	255	255	255	510	510
											242	2	255	255	255	510	510
											243	30	255	255	255	7650	7650
											244	309	255	255	255	78795	78795
											245	2	255	255	255	510	510
											246	3	255	255	255	765	765
											247	2	255	255	255	510	510
											248	199	255	255	255	50745	50745
											249	3	255	255	255	765	765
											250	16	255	255	255	4080	4080
											251	2	255	255	255	510	510
											252	2	255	255	255	510	510
											253	112	255	255	255	28560	28560
											254	2	255	255	255	510	510
											255	2	255	255	255	510	510
											256	66	255	255	255	16830	16830
											257	77	255	255	255	19635	19635
											258	2	255	255	255	510	510
											259	2	255	255	255	510	510
											260	2	255	255	255	510	510
											261	2	255	255	255	510	510
											262	3	255	255	255	765	765
											263	2	255	255	255	510	510
											264	2	255	255	255	510	510
											265	5	255	255	255	1275	1275
											266	3	255	255	255	765	765
											267	5	255	255	255	1275	1275
											268	5	255	255	255	1275	1275
											269	2	255	255	255	510	510
											270	2	255	255	255	510	510
											271	2	255	255	255	510	510
											272	11	255	255	255	2805	2805
											273	78	255	255	255	19890	19890
											274	2	255	255	255	510	510
											275	4	255	255	255	1020	1020
											276	2	255	255	255	510	510
											277	3	255	255	255	765	765
											278	2	255	255	255	510	510
											279	2	255	255	255	510	510
											280	3	255	255	255	765	765
											281	9	255	255	255	2295	2295
											282	5	255	255	255	1275	1275
											283	2	255	255	255	510	510
											284	2	255	255	255	510	510
											285	2	255	255	255	510	510
											286	9	255	255	255	2295	2295
											287	65	255	255	255	16575	16575
											288	3	255	255	255	765	765
											289	18	255	255	255	4590	4590
											290	2	255	255	255	510	510
											291	2	255	255	255	510	510
											292	2	255	255	255	510	510
											293	2	255	255	255	510	510
											294	2	255	255	255	510	510
											295	7	255	255	255	1785	1785
											296	3	255	255	255	765	765
											297	4	255	255	255	1020	1020
											298	59	255	255	255	15045	15045
											299	2	255	255	255	510	510
											300	63	255	255	255	16065	16065
											301	61	255	255	255	15555	15555
											302	253	255	255	255	64515	64515
											303	109	255	255	255	27795	27795
											304	57	255	255	255	14535	14535
											305	2	255	255	255	510	510
											306	2	255	255	255	510	510
											307	2	255	255	255	510	510
											308	2	255	255	255	510	510
											309	2	255	255	255	510	510
											310	2	255	255	255	510	510
											311	78	255	255	255	19890	19890
											312	89	255	255	255	22695	22695
											313	5	255	255	255	1275	1275
											314	4	255	255	255	1020	1020
											315	2	255	255	255	510	510
											316	2	255	255	255	510	510
											317	2	255	255	255	510	510
											318	2	255	255	255	510	510
											319	398	255	255	255	101490	101490
											320	44	255	255	255	11220	11220
											321	2	255	255	255	510	510
											322	176	255	255	255	44880	44880
											323	5	255	255	255	1275	1275
											324	2	255	255	255	510	510
											325	26	255	255	255	6630	6630
											326	3	255	255	255	765	765
											327	5	255	255	255	1275	1275
											328	2	255	255	255	510	510
											1	61696	255	255	255	15732480	15732480
											2	4	255	255	255	1020	1020
											3	52	255	255	255	13260	13260
											4	883	255	255	255	225165	225165
											5	2	255	255	255	510	510
											6	2	255	255	255	510	510
											7	79	255	255	255	20145	20145
											8	53	255	255	255	13515	13515
											9	65	255	255	255	16575	16575
											10	58	255	255	255	14790	14790
											11	2	255	255	255	510	510
											12	3	255	255	255	765	765
											13	43	255	255	255	10965	10965
											14	64	255	255	255	16320	16320
											15	2	255	255	255	510	510
											16	3	255	255	255	765	765
											17	4	255	255	255	1020	1020
											18	2	255	255	255	510	510
											19	2	255	255	255	510	510
											20	39	255	255	255	9945	9945
											21	464	255	255	255	118320	118320
											22	2	255	255	255	510	510
											23	66	255	255	255	16830	16830
											24	156	255	255	255	39780	39780
											25	2	255	255	255	510	510
											26	2	255	255	255	510	510
											27	7	255	255	255	1785	1785
											28	2	255	255	255	510	510
											29	5	255	255	255	1275	1275
											30	17	255	255	255	4335	4335
											31	5	255	255	255	1275	1275
											32	2	255	255	255	510	510
											33	2	255	255	255	510	510
											34	6	255	255	255	1530	1530
											35	2	255	255	255	510	510
											36	7	255	255	255	1785	1785
											37	2	255	255	255	510	510
											38	55	255	255	255	14025	14025
											39	2	255	255	255	510	510
											40	133	255	255	255	33915	33915
											41	2	255	255	255	510	510
											42	2	255	255	255	510	510
											43	3	255	255	255	765	765
											44	2	255	255	255	510	510
											45	3	255	255	255	765	765
											46	23	255	255	255	5865	5865
											47	5	255	255	255	1275	1275
											48	3	255	255	255	765	765
											49	5	255	255	255	1275	1275
											50	4	255	255	255	1020	1020
											51	4	255	255	255	1020	1020
											52	2	255	255	255	510	510
											53	8	255	255	255	2040	2040
											54	8	255	255	255	2040	2040
											55	4	255	255	255	1020	1020
											56	95	255	255	255	24225	24225
											57	2	255	255	255	510	510
											58	384	255	255	255	97920	97920
											59	2	255	255	255	510	510
											60	4	255	255	255	1020	1020
											61	2	255	255	255	510	510
											62	2	255	255	255	510	510
											63	2	255	255	255	510	510
											64	56	255	255	255	14280	14280
											65	2	255	255	255	510	510
											66	24	255	255	255	6120	6120
											67	3	255	255	255	765	765
											68	6	255	255	255	1530	1530
											69	2	255	255	255	510	510
											70	2	255	255	255	510	510
											71	13	255	255	255	3315	3315
											72	2	255	255	255	510	510
											73	718	255	255	255	183090	183090
											74	5	255	255	255	1275	1275
											75	8	255	255	255	2040	2040
											76	31	255	255	255	7905	7905
											77	2	255	255	255	510	510
											78	2	255	255	255	510	510
											79	320	255	255	255	81600	81600
											80	6	255	255	255	1530	1530
											81	6	255	255	255	1530	1530
											82	46	255	255	255	11730	11730
											83	4	255	255	255	1020	1020
											84	2	255	255	255	510	510
											85	2	255	255	255	510	510
											86	2	255	255	255	510	510
											87	2	255	255	255	510	510
											88	2	255	255	255	510	510
											89	2	255	255	255	510	510
											90	415	255	255	255	105825	105825
											91	3	255	255	255	765	765
											92	2	255	255	255	510	510
											93	2	255	255	255	510	510
											94	2	255	255	255	510	510
											95	2	255	255	255	510	510
											96	13	255	255	255	3315	3315
											97	2	255	255	255	510	510
											98	2	255	255	255	510	510
											99	2	255	255	255	510	510
											100	41	255	255	255	10455	10455
											101	2	255	255	255	510	510
											102	4	255	255	255	1020	1020
											103	61	255	255	255	15555	15555
											104	2	255	255	255	510	510
											105	2	255	255	255	510	510
											106	5	255	255	255	1275	1275
											107	2	255	255	255	510	510
											108	16	255	255	255	4080	4080
											109	5	255	255	255	1275	1275
											110	2	255	255	255	510	510
											111	2	255	255	255	510	510
											112	3	255	255	255	765	765
											113	2	255	255	255	510	510
											114	39	255	255	255	9945	9945
											115	3	255	255	255	765	765
											116	2	255	255	255	510	510
											117	35	255	255	255	8925	8925
											118	2	255	255	255	510	510
											119	4	255	255	255	1020	1020
											120	3	255	255	255	765	765
											121	218	255	255	255	55590	55590
											122	21	255	255	255	5355	5355
											123	2	255	255	255	510	510
											124	12	255	255	255	3060	3060
											125	2	255	255	255	510	510
											126	3	255	255	255	765	765
											127	3	255	255	255	765	765
											128	2	255	255	255	510	510
											129	2	255	255	255	510	510
											130	143	255	255	255	36465	36465
											131	57	255	255	255	14535	14535
											132	4	255	255	255	1020	1020
											133	103	255	255	255	26265	26265
											134	174	255	255	255	44370	44370
											135	2	255	255	255	510	510
											136	2	255	255	255	510	510
											137	2	255	255	255	510	510
											138	6	255	255	255	1530	1530
											139	2	255	255	255	510	510
											140	2	255	255	255	510	510
											141	3	255	255	255	765	765
											142	2	255	255	255	510	510
											143	2	255	255	255	510	510
											144	2	255	255	255	510	510
											145	9	255	255	255	2295	2295
											146	7	255	255	255	1785	1785
											147	2	255	255	255	510	510
											148	74	255	255	255	18870	18870
											149	2	255	255	255	510	510
											150	2	255	255	255	510	510
											151	2	255	255	255	510	510
											152	5	255	255	255	1275	1275
											153	3	255	255	255	765	765
											154	71	255	255	255	18105	18105
											155	4	255	255	255	1020	1020
											156	2	255	255	255	510	510
											157	2	255	255	255	510	510
											158	3	255	255	255	765	765
											159	2	255	255	255	510	510
											160	3	255	255	255	765	765
											161	2	255	255	255	510	510
											162	2	255	255	255	510	510
											163	13	255	255	255	3315	3315
											164	241	255	255	255	61455	61455
											165	2	255	255	255	510	510
											166	72	255	255	255	18360	18360
											167	2	255	255	255	510	510
											168	9	255	255	255	2295	2295
											169	2	255	255	255	510	510
											170	3	255	255	255	765	765
											171	2	255	255	255	510	510
											172	4	255	255	255	1020	1020
											173	77	255	255	255	19635	19635
											174	2	255	255	255	510	510
											175	4	255	255	255	1020	1020
											176	18	255	255	255	4590	4590
											177	3	255	255	255	765	765
											178	25	255	255	255	6375	6375
											179	19	255	255	255	4845	4845
											180	219	255	255	255	55845	55845
											181	54	255	255	255	13770	13770
											182	2	255	255	255	510	510
											183	3	255	255	255	765	765
											184	3	255	255	255	765	765
											185	2	255	255	255	510	510
											186	377	255	255	255	96135	96135
											187	2	255	255	255	510	510
											188	86	255	255	255	21930	21930
											189	3	255	255	255	765	765
											190	3	255	255	255	765	765
											191	2	255	255	255	510	510
											192	7	255	255	255	1785	1785
											193	33	255	255	255	8415	8415
											194	2	255	255	255	510	510
											195	2	255	255	255	510	510
											196	27	255	255	255	6885	6885
											197	9	255	255	255	2295	2295
											198	234	255	255	255	59670	59670
											199	2	255	255	255	510	510
											200	79	255	255	255	20145	20145
											201	85	255	255	255	21675	21675
											202	3	255	255	255	765	765
											203	5	255	255	255	1275	1275
											204	3	255	255	255	765	765
											205	3	255	255	255	765	765

## Sheet: 420 - summary
BFP									TF-GFP
	Count	Total Area	Ave. Size	% Area	Mean	IntDen				Count	Total Area	Ave. Size	% Area	Mean	IntDen		TF normalised to BFP	%	Average
MAX_20211015_E35_TN_1_420.lif - Series009 - C=0	237	86910	366.709	33.154	255	93510.8			MAX_20211015_E35_TN_1_420.lif - Series009 - C=1	327	25393	77.654	9.687	255	19801.9		0.21176	21.176	15.313
MAX_20211015_E35_TN_1_420.lif - Series011 - C=0	131	85100	649.618	32.463	255	165653			MAX_20211015_E35_TN_1_420.lif - Series011 - C=1	323	44132	136.632	16.835	255	34841.1		0.210326	21.0326
MAX_20211015_E35_TN_1_420.lif - Series013 - C=0	85	124533	1465.09	47.506	255	373599			MAX_20211015_E35_TN_1_420.lif - Series013 - C=1	317	16734	52.789	6.384	255	13461.1		0.0360309	3.60309
MAX_20211015_E35_TN_1_420.lif - Series015 - C=0	114	110030	965.175	41.973	255	246120			MAX_20211015_E35_TN_1_420.lif - Series015 - C=1	483	65687	135.998	25.058	255	34679.5		0.140905	14.0905
MAX_20211015_E35_TN_1_420.lif - Series017 - C=0	85	106229	1249.75	40.523	255	318687			MAX_20211015_E35_TN_1_420.lif - Series017 - C=1	328	70543	215.07	26.91	255	54842.9		0.17209	17.209
MAX_20211015_E35_TN_1_420.lif - Series019 - C=0	49	112072	2287.18	42.752	255	583232			MAX_20211015_E35_TN_1_420.lif - Series019 - C=1	205	69236	337.737	26.411	255	86122.8		0.147665	14.7665

## Sheet: General summary
					Normalised IntDen
				12xTF	0.919151
					0.443626
					1.22862		1.01726
					0.977092
					1.51782
				16xTF plain	5.58821
					10.3634
					13.0319		11.1076
					16.5307
					10.0235
				16xTF enhanced	21.176
					21.0326
					14.7665		17.6549
					14.0905
					17.209
